# Supplementary material
Source: PubMed Central journal article supplement (PMC3324774)
Supplement: pro0021-0299-SD1.pdf [file pro0021-0299-SD1.pdf]

**SUPPLEMENTARY MATERIAL**  
**for**  
**Protein topology from predicted**  
**residue contacts**

William R. Taylor, David T. Jones and Michael I. Sadowski

November 8, 2011

# 1 Protein Data

For each protein, following a summary taken from the main paper, the following data sets are included:

1. RASMOL images are shown of the  $\alpha$ -carbon trace of the best (reranked) model: [*top left*] coloured by secondary structure type as: red =  $\alpha$ -helix and green =  $\beta$ -strand and [*top right*] coloured by chain position (blue = amino to red = carboxy terminus). [*lower left*] The native structure coloured by chain position. [*lower right*] The top ranked model superposed on the native structure (using the SAP program) and coloured by chain position.

All structures are viewed along the first  $\beta$ -strand in the sheet with it approaching the viewer and with the first  $\alpha$ -helix following this strand lying above the sheet. This corresponds to the orientation of the topology diagram taken from the topology string when 'A' is the top layer and 'a' is the bottom layer with negative numbers to the left and positive to the right. (See Figure of the main text for examples).

2. Multiple sequence alignment and predicted secondary structures. [*panel 1*] Amino acids are coloured individually using the colour wheel defined by Taylor, Prot.Eng. (1997) 10:743-746. [*panel 2*] Secondary structure predicted by PSIPRED and coloured red =  $\alpha$  and green =  $\beta$ . [*panel 3*] The average colour values in panel 2. [*panel 4*] The average colour values in panel 1.
3. Dot plot of predicted (red) and observed (green) residue contacts. The latter are plotted first with a slightly larger dot size to allow coincident points to be distinguished. (Plots were made with GNUPLOT). An observed contacts is plotted if two virtual centroids positions come within  $8\text{\AA}$ . The virtual centroid is a point  $2\text{\AA}$  distant from the  $\alpha$ -carbon along the line bisecting the virtual  $\alpha$ -carbon bond angle. It generally lies between the

$\beta$ -carbon and  $\gamma$ -carbon positions of the side-chain. No allowance is made for glycine as the model represents a multiple sequence alignment and not a single sequence.

4. Ranked topology lists: (only the top part of the file is shown here. The full lists can be obtained from the data archive given below.) [*upper*] The full list of models ranked on field 7 which is the product of the PLATO score (field 8) and the the contact score (field 9). The topology string is field 12. [*middle*] the best list (top 500 models from the full list). [*lower*] the best list reranked on contact score (field 9).

All the above data are included in the zipped tar archive at  
[http://mathbio.nimr.mrc.ac.uk/wiki/Software#Supplementary\\_info](http://mathbio.nimr.mrc.ac.uk/wiki/Software#Supplementary_info)

## 1.1 ‘Training’ test set

2trxA (108) = +B+0.-A+0.+B-2.-a+0.+B-1.[-A-1.]-B-3.+B-4.-a-1.

**Thioredoxin** has a typical glutaredoxin fold. The protein contains the unusual topological feature of a helix located in a loop between two antiparallel  $\beta$ -strands. This helix (bracketed in the topology string) is usually poorly predicted by the secondary structure prediction methods and often is modelled as a loop giving a larger RMS value when compared to the PDB structure for a protein of this size.

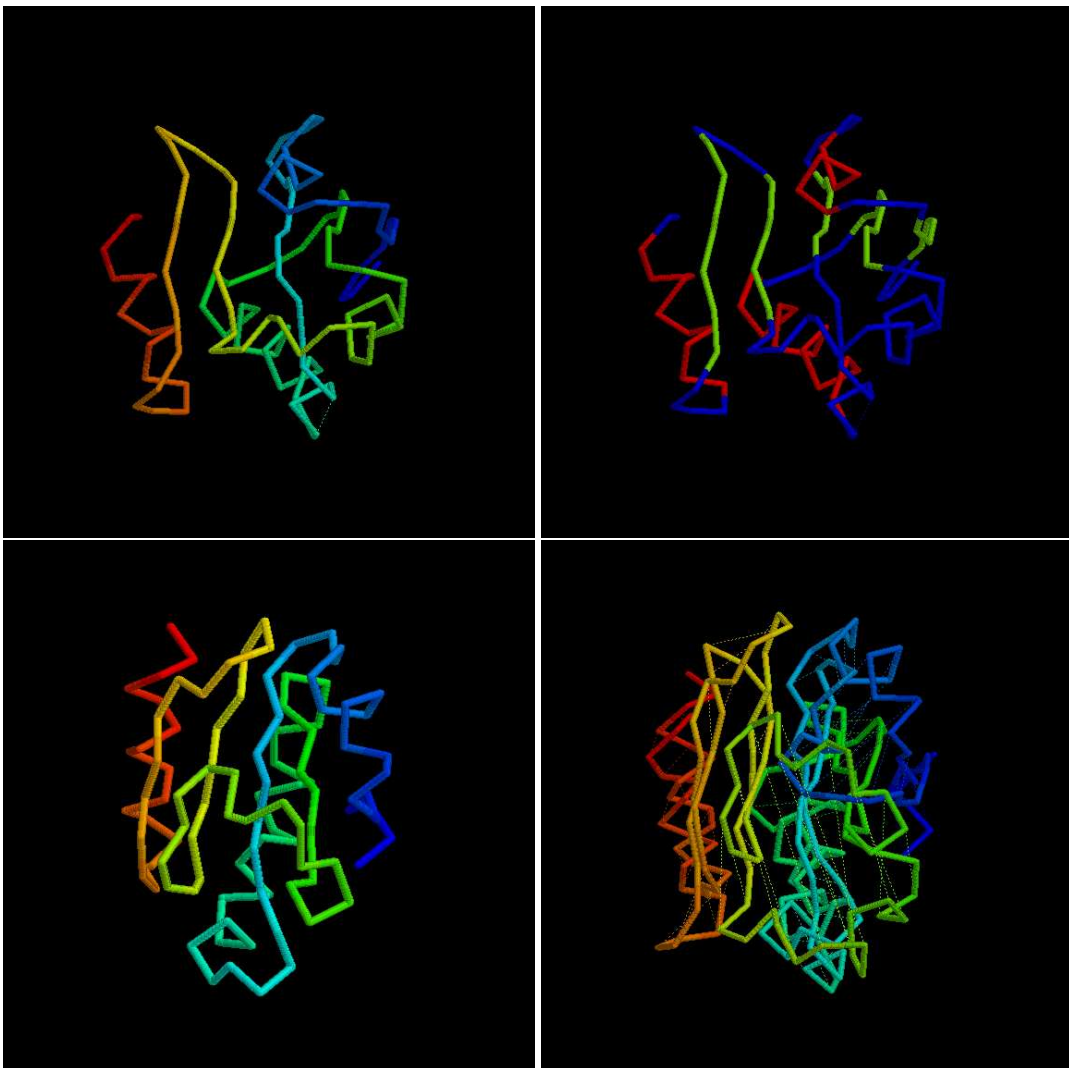

EFNEANFETEVLQSTEPVLVDFWAPWCGPRLQAPVI DQLSQEYES GAKVGVVDTDQNP SLARKYGI QSI P TVMI F KDGEVVSQFMGVQP KS KLQEAIDSA  
LEITDATFEEQVLSKDKPVLVDFWAAWCGP RMVGPVIEEAGEYEGKAVI VGVVVDANQEF AAKYGVNRNI P TVLMFKNGEVVGRQVGVAP KATYTEAIDGLL  
MSGKYL VATQNFKAEVLES GKVALVDFWAAWCGP MMLGPVIEELAGDYEGKAVI AKVNVDDNPNTAAQYGI RSI P TMLVFKNGQVVDQMGAMP KNMI AKKI DEHI  
DSPVKL N S N FDETL K N N E N V V V D F W A E W C M P C K M I A P V I E E L A K E Y A G K V V F G K L N T D E N P T I A A R Y G I S A I P T L I F F K K G K P V D Q L V G A M P K S E L K R W Q R N L  
NVTDS SFKNEVLES DLPVMVDFWAEWCGPKMLIPII DEI S KELQDRVVKVKMNI DENPKTPSEYGI RSI P TI MLFKNGEQKDTKI GLQOKNSLLDWI NKS I  
HVLVEMDASFNEEVI KSSYPVLVDFWAPWCGP RMVAPVVNQI AHEYKDKLKVVTLNTDKNPSTAAEYGI RSI P TLI I F I EGQRVHTVVGAI P KSTLI STL NKHL  
QVSDASFEDVLDSELPLVDFWAPWCGP RMVAPVVDEI S QOYEGKVVVKVLTNDENPNTAS QYGI RSI P TLM I F K G G Q R V D M V V G A V P K T T L A S T L E K Y L  
VSDSFESDVI NASGPVLVDFWAEWCGPKQI SPAL EEI AEEMS G S L T V A K V N I D D H P M T P G K Y G V R G I P T L M I F K D G Q V V S T K I G A M A K G K I S E W V Q E T L  
MSANTVAVSDSFEADVLSKSGPVLVDFWAEWCGPKMI APAL EEI GA E Y Q G R L K V A K V N I D S N P E A P T K Y G V R S I P T L I V F K D G K P V A Q Q M G A L P K S Q L K A W I D Q S L  
SEVLHTT DAT FDTDVL KSDI P VLLDF WAPWCGP RMI GPI L E E L S A E L G D R V K I V K I N I D E N Q A T P A O F G V R S I P T L I F F K E G K A V A T Q V G A L P K N Q L V N F I N Q N  
MSEQIKHISDASFQDQVLSKDKPVLVDFWAEWCGPKMI API L D E V A K D Y G D R L Q I A K I N V D D N Q A T P A K F G V R G I P T L I L F K N G A A A A Q K V G A L S K S Q L T A F L D S H L  
MSDKI VYLS DDS FENDVLSKETPVLVDFWAEWCGPKMI API L N D V A E E Y A G K L T V A K L N V D Q N N V S P A K Y G V R G I P T L L M F K G G E L V A T K V G A L S K T Q L K E F I D A K I  
MSDKI I YLS DDS FENDVLSKDLPLVDFWAEWCGPKMI API L D D V S E E Y A G R V T I A K L N V D Q N N V S P A K Y G V R G I P T L L L F K N G E L A A T K V G A L S K T Q L K E F I D A Q I  
MSDAI LYVS DDS FETDVLKSSKPVLVDFWAEWCGPKMI API L E E I A D E Y A D R L R V A K F N I D E N P N T P Q Y A I R G I P T L L L F K A G K L E A T K V G A L S K A Q L T A F L D S Q L  
MSDKI I HLS DDS FDTDVLKASGLVLVDFWAEWCGPKMI API L D E I A B E Y E G R L T I T K L N I D E N Q T A P K Y G I R G I P T L L L F R D G E V V A T K V G A L S K G Q L K A F L D A N L

EFNEANFETEVLQSTEPVLVDFWAPWCGPRLQAPVI DQLSQEYES GAKVGVVDTDQNP SLARKYGI QSI P TVMI F KDGEVVSQFMGVQP KS KLQEAIDSA  
LEITDATFEEQVLSKDKPVLVDFWAAWCGP RMVGPVIEEAGEYEGKAVI VGVVVDANQEF AAKYGVNRNI P TVLMFKNGEVVGRQVGVAP KATYTEAIDGLL  
MSGKYL VATQNFKAEVLES GKVALVDFWAAWCGP MMLGPVIEELAGDYEGKAVI AKVNVDDNPNTAAQYGI RSI P TMLVFKNGQVVDQMGAMP KNMI AKKI DEHI  
DSPVKL N S N FDETL K N N E N V V V D F W A E W C M P C K M I A P V I E E L A K E Y A G K V V F G K L N T D E N P T I A A R Y G I S A I P T L I F F K K G K P V D Q L V G A M P K S E L K R W Q R N L  
NVTDS SFKNEVLES DLPVMVDFWAEWCGPKMLIPII DEI S KELQDRVVKVKMNI DENPKTPSEYGI RSI P TI MLFKNGEQKDTKI GLQOKNSLLDWI NKS I  
HVLVEMDASFNEEVI KSSYPVLVDFWAPWCGP RMVAPVVNQI AHEYKDKLKVVTLNTDKNPSTAAEYGI RSI P TLI I F I EGQRVHTVVGAI P KSTLI STL NKHL  
QVSDASFEDVLDSELPLVDFWAPWCGP RMVAPVVDEI S QOYEGKVVVKVLTNDENPNTAS QYGI RSI P TLM I F K G G Q R V D M V V G A V P K T T L A S T L E K Y L  
VSDSFESDVI NASGPVLVDFWAEWCGPKQI SPAL EEI AEEMS G S L T V A K V N I D D H P M T P G K Y G V R G I P T L M I F K D G Q V V S T K I G A M A K G K I S E W V Q E T L  
MSANTVAVSDSFEADVLSKSGPVLVDFWAEWCGPKMI APAL EEI GA E Y Q G R L K V A K V N I D S N P E A P T K Y G V R S I P T L I V F K D G K P V A Q Q M G A L P K S Q L K A W I D Q S L  
SEVLHTT DAT FDTDVL KSDI P VLLDF WAPWCGP RMI GPI L E E L S A E L G D R V K I V K I N I D E N Q A T P A O F G V R S I P T L I F F K E G K A V A T Q V G A L P K N Q L V N F I N Q N  
MSEQIKHISDASFQDQVLSKDKPVLVDFWAEWCGPKMI API L D E V A K D Y G D R L Q I A K I N V D D N Q A T P A K F G V R G I P T L I L F K N G A A A A Q K V G A L S K S Q L T A F L D S H L  
MSDKI VYLS DDS FENDVLSKETPVLVDFWAEWCGPKMI API L N D V A E E Y A G K L T V A K L N V D Q N N V S P A K Y G V R G I P T L L M F K G G E L V A T K V G A L S K T Q L K E F I D A K I  
MSDKI I YLS DDS FENDVLSKDLPLVDFWAEWCGPKMI API L D D V S E E Y A G R V T I A K L N V D Q N N V S P A K Y G V R G I P T L L L F K N G E L A A T K V G A L S K T Q L K E F I D A Q I  
MSDAI LYVS DDS FETDVLKSSKPVLVDFWAEWCGPKMI API L E E I A D E Y A D R L R V A K F N I D E N P N T P Q Y A I R G I P T L L L F K A G K L E A T K V G A L S K A Q L T A F L D S Q L  
MSDKI I HLS DDS FDTDVLKASGLVLVDFWAEWCGPKMI API L D E I A B E Y E G R L T I T K L N I D E N Q T A P K Y G I R G I P T L L L F R D G E V V A T K V G A L S K G Q L K A F L D A N L

EFNEANFETEVLQSTEPVLVDFWAPWCGPRLQAPVI DQLSQEYES GAKVGVVDTDQNP SLARKYGI QSI P TVMI F KDGEVVSQFMGVQP KS KLQEAIDSA  
LEITDATFEEQVLSKDKPVLVDFWAAWCGP RMVGPVIEEAGEYEGKAVI VGVVVDANQEF AAKYGVNRNI P TVLMFKNGEVVGRQVGVAP KATYTEAIDGLL  
MSGKYL VATQNFKAEVLES GKVALVDFWAAWCGP MMLGPVIEELAGDYEGKAVI AKVNVDDNPNTAAQYGI RSI P TMLVFKNGQVVDQMGAMP KNMI AKKI DEHI  
DSPVKL N S N FDETL K N N E N V V V D F W A E W C M P C K M I A P V I E E L A K E Y A G K V V F G K L N T D E N P T I A A R Y G I S A I P T L I F F K K G K P V D Q L V G A M P K S E L K R W Q R N L  
NVTDS SFKNEVLES DLPVMVDFWAEWCGPKMLIPII DEI S KELQDRVVKVKMNI DENPKTPSEYGI RSI P TI MLFKNGEQKDTKI GLQOKNSLLDWI NKS I  
HVLVEMDASFNEEVI KSSYPVLVDFWAPWCGP RMVAPVVNQI AHEYKDKLKVVTLNTDKNPSTAAEYGI RSI P TLI I F I EGQRVHTVVGAI P KSTLI STL NKHL  
QVSDASFEDVLDSELPLVDFWAPWCGP RMVAPVVDEI S QOYEGKVVVKVLTNDENPNTAS QYGI RSI P TLM I F K G G Q R V D M V V G A V P K T T L A S T L E K Y L  
VSDSFESDVI NASGPVLVDFWAEWCGPKQI SPAL EEI AEEMS G S L T V A K V N I D D H P M T P G K Y G V R G I P T L M I F K D G Q V V S T K I G A M A K G K I S E W V Q E T L  
MSANTVAVSDSFEADVLSKSGPVLVDFWAEWCGPKMI APAL EEI GA E Y Q G R L K V A K V N I D S N P E A P T K Y G V R S I P T L I V F K D G K P V A Q Q M G A L P K S Q L K A W I D Q S L  
SEVLHTT DAT FDTDVL KSDI P VLLDF WAPWCGP RMI GPI L E E L S A E L G D R V K I V K I N I D E N Q A T P A O F G V R S I P T L I F F K E G K A V A T Q V G A L P K N Q L V N F I N Q N  
MSEQIKHISDASFQDQVLSKDKPVLVDFWAEWCGPKMI API L D E V A K D Y G D R L Q I A K I N V D D N Q A T P A K F G V R G I P T L I L F K N G A A A A Q K V G A L S K S Q L T A F L D S H L  
MSDKI VYLS DDS FENDVLSKETPVLVDFWAEWCGPKMI API L N D V A E E Y A G K L T V A K L N V D Q N N V S P A K Y G V R G I P T L L M F K G G E L V A T K V G A L S K T Q L K E F I D A K I  
MSDKI I YLS DDS FENDVLSKDLPLVDFWAEWCGPKMI API L D D V S E E Y A G R V T I A K L N V D Q N N V S P A K Y G V R G I P T L L L F K N G E L A A T K V G A L S K T Q L K E F I D A Q I  
MSDAI LYVS DDS FETDVLKSSKPVLVDFWAEWCGPKMI API L E E I A D E Y A D R L R V A K F N I D E N P N T P Q Y A I R G I P T L L L F K A G K L E A T K V G A L S K A Q L T A F L D S Q L  
MSDKI I HLS DDS FDTDVLKASGLVLVDFWAEWCGPKMI API L D E I A B E Y E G R L T I T K L N I D E N Q T A P K Y G I R G I P T L L L F R D G E V V A T K V G A L S K G Q L K A F L D A N L

EFNEANFETEVLQSTEPVLVDFWAPWCGPRLQAPVI DQLSQEYES GAKVGVVDTDQNP SLARKYGI QSI P TVMI F KDGEVVSQFMGVQP KS KLQEAIDSA  
LEITDATFEEQVLSKDKPVLVDFWAAWCGP RMVGPVIEEAGEYEGKAVI VGVVVDANQEF AAKYGVNRNI P TVLMFKNGEVVGRQVGVAP KATYTEAIDGLL  
MSGKYL VATQNFKAEVLES GKVALVDFWAAWCGP MMLGPVIEELAGDYEGKAVI AKVNVDDNPNTAAQYGI RSI P TMLVFKNGQVVDQMGAMP KNMI AKKI DEHI  
DSPVKL N S N FDETL K N N E N V V V D F W A E W C M P C K M I A P V I E E L A K E Y A G K V V F G K L N T D E N P T I A A R Y G I S A I P T L I F F K K G K P V D Q L V G A M P K S E L K R W Q R N L  
NVTDS SFKNEVLES DLPVMVDFWAEWCGPKMLIPII DEI S KELQDRVVKVKMNI DENPKTPSEYGI RSI P TI MLFKNGEQKDTKI GLQOKNSLLDWI NKS I  
HVLVEMDASFNEEVI KSSYPVLVDFWAPWCGP RMVAPVVNQI AHEYKDKLKVVTLNTDKNPSTAAEYGI RSI P TLI I F I EGQRVHTVVGAI P KSTLI STL NKHL  
QVSDASFEDVLDSELPLVDFWAPWCGP RMVAPVVDEI S QOYEGKVVVKVLTNDENPNTAS QYGI RSI P TLM I F K G G Q R V D M V V G A V P K T T L A S T L E K Y L  
VSDSFESDVI NASGPVLVDFWAEWCGPKQI SPAL EEI AEEMS G S L T V A K V N I D D H P M T P G K Y G V R G I P T L M I F K D G Q V V S T K I G A M A K G K I S E W V Q E T L  
MSANTVAVSDSFEADVLSKSGPVLVDFWAEWCGPKMI APAL EEI GA E Y Q G R L K V A K V N I D S N P E A P T K Y G V R S I P T L I V F K D G K P V A Q Q M G A L P K S Q L K A W I D Q S L  
SEVLHTT DAT FDTDVL KSDI P VLLDF WAPWCGP RMI GPI L E E L S A E L G D R V K I V K I N I D E N Q A T P A O F G V R S I P T L I F F K E G K A V A T Q V G A L P K N Q L V N F I N Q N  
MSEQIKHISDASFQDQVLSKDKPVLVDFWAEWCGPKMI API L D E V A K D Y G D R L Q I A K I N V D D N Q A T P A K F G V R G I P T L I L F K N G A A A A Q K V G A L S K S Q L T A F L D S H L  
MSDKI VYLS DDS FENDVLSKETPVLVDFWAEWCGPKMI API L N D V A E E Y A G K L T V A K L N V D Q N N V S P A K Y G V R G I P T L L M F K G G E L V A T K V G A L S K T Q L K E F I D A K I  
MSDKI I YLS DDS FENDVLSKDLPLVDFWAEWCGPKMI API L D D V S E E Y A G R V T I A K L N V D Q N N V S P A K Y G V R G I P T L L L F K N G E L A A T K V G A L S K T Q L K E F I D A Q I  
MSDAI LYVS DDS FETDVLKSSKPVLVDFWAEWCGPKMI API L E E I A D E Y A D R L R V A K F N I D E N P N T P Q Y A I R G I P T L L L F K A G K L E A T K V G A L S K A Q L T A F L D S Q L  
MSDKI I HLS DDS FDTDVLKASGLVLVDFWAEWCGPKMI API L D E I A B E Y E G R L T I T K L N I D E N Q T A P K Y G I R G I P T L L L F R D G E V V A T K V G A L S K G Q L K A F L D A N L

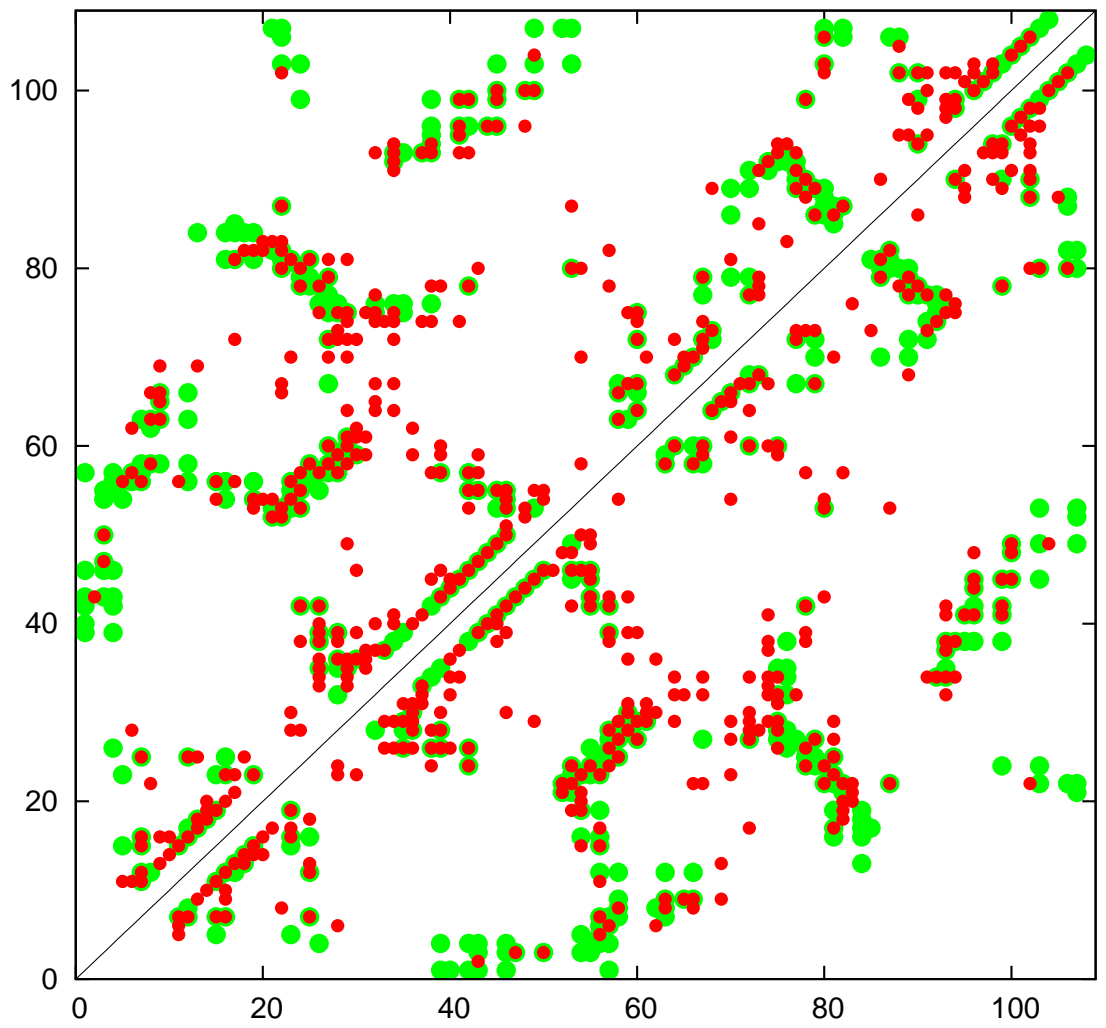

full.list

|                                      |       |      |    |      |    |         |       |       |                |         |                                  |         |
|--------------------------------------|-------|------|----|------|----|---------|-------|-------|----------------|---------|----------------------------------|---------|
| build2trxA/folds/fold-0-0-10:REMARK  | Build | Rank | 10 | Fold | 27 | 813.242 | 33.81 | 24.06 | bBeEDdaACcfFgG | beDaCfG | +A0.+B0.-a0.+B2.-B1.+B-1.-a-1.   | 810.318 |
| build2trxA/folds/fold-0-0-40:REMARK  | Build | Rank | 40 | Fold | 51 | 425.947 | 17.42 | 24.46 | bBAadDEecCFfGg | bAdEcFg | -A0.+B0.-a0.+B2.-B1.-B3.+a+1.    | 420.086 |
| build2trxA/folds/fold-0-0-50:REMARK  | Build | Rank | 50 | Fold | 55 | 377.752 | 16.02 | 23.57 | bBAadDFfcCEeGg | bAdFcEG | -A0.+B0.-a0.+B3.-B1.+B2.+a+1.    | 371.632 |
| build2trxA/folds/fold-0-10-10:REMARK | Build | Rank | 10 | Fold | 99 | 486.197 | 19.46 | 24.98 | BbaAEedDCcfFgG | BaEdCfG | -A0.+B0.-A-1.+B-2.-B-1.+B-3.+a0. | 483.732 |
| build2trxA/folds/fold-0-10-20:REMARK | Build | Rank | 20 | Fold | 61 | 351.752 | 19.02 | 18.49 | BbaAeEFfdCCgG  | BaeFdCg | -A0.+B0.+A-1.-B-3.+B-2.-B-1.+a0. | 347.942 |
| build2trxA/folds/fold-0-10-30:REMARK | Build | Rank | 30 | Fold | 78 | 274.462 | 17.53 | 15.66 | BbaAeECcdDFfGg | BaeCdFg | -A0.+B0.+A-1.-B-1.+B-2.-B-3.-a0. | 269.878 |
| build2trxA/folds/fold-0-1-10:REMARK  | Build | Rank | 10 | Fold | 27 | 813.242 | 33.81 | 24.06 | bBeEDdaACcfFgG | beDaCfG | +A0.+B0.-a0.+B2.-B1.+B-1.-a-1.   | 810.9   |
| build2trxA/folds/fold-0-11-10:REMARK | Build | Rank | 10 | Fold | 99 | 486.197 | 19.46 | 24.98 | BbaAEedDCcfFgG | BaEdCfG | -A0.+B0.-A-1.+B-2.-B-1.+B-3.+a0. | 483.835 |
| build2trxA/folds/fold-0-11-20:REMARK | Build | Rank | 20 | Fold | 61 | 351.752 | 19.02 | 18.49 | BbaAeEFfdCCgG  | BaeFdCg | -A0.+B0.+A-1.-B-3.+B-2.-B-1.+a0. | 347.309 |
| build2trxA/folds/fold-0-11-30:REMARK | Build | Rank | 30 | Fold | 78 | 274.462 | 17.53 | 15.66 | BbaAeECcdDFfGg | BaeCdFg | -A0.+B0.+A-1.-B-1.+B-2.-B-3.-a0. | 269.104 |

best.list

|              |       |      |   |      |     |          |       |       |                  |          |                                       |         |
|--------------|-------|------|---|------|-----|----------|-------|-------|------------------|----------|---------------------------------------|---------|
| fold-13-2-1  | Build | Rank | 1 | Fold | 241 | 1942.635 | 43.94 | 44.22 | aACcdDEebBFfgGHh | aCdEbFgH | +B0.-A0.+B-2.-a0.+B-1.-B-3.+B-4.-a-1. | 3784.87 |
| fold-13-3-1  | Build | Rank | 1 | Fold | 241 | 1942.635 | 43.94 | 44.22 | aACcdDEebBFfgGHh | aCdEbFgH | +B0.-A0.+B-2.-a0.+B-1.-B-3.+B-4.-a-1. | 2640.01 |
| fold-1-0-1   | Build | Rank | 1 | Fold | 105 | 1904.679 | 45.22 | 42.12 | BbcCDdaAEefFgG   | BcDaEfG  | -A0.+B0.-a0.+B+1.-B-1.+B-2.-a-1.      | 2431.15 |
| fold-1-1-1   | Build | Rank | 1 | Fold | 105 | 1904.679 | 45.22 | 42.12 | BbcCDdaAEefFgG   | BcDaEfG  | -A0.+B0.-a0.+B+1.-B-1.+B-2.-a-1.      | 2599.77 |
| fold-15-2-1  | Build | Rank | 1 | Fold | 101 | 1899.696 | 42.17 | 45.04 | aACcdDEebBFfgGHh | aCdEbFgH | +B0.-A0.+B-2.-a0.+B-1.-B-3.+B-4.-a-1. | 2956.94 |
| fold-15-3-1  | Build | Rank | 1 | Fold | 101 | 1899.696 | 42.17 | 45.04 | aACcdDEebBFfgGHh | aCdEbFgH | +B0.-A0.+B-2.-a0.+B-1.-B-3.+B-4.-a-1. | 2161.64 |
| fold-15-25-1 | Build | Rank | 1 | Fold | 41  | 1894.865 | 45.78 | 41.39 | aADdcCFfbBEegGHh | aDcFbEgH | +B0.-A0.+B-2.-a0.+B-1.-B-3.+B-4.-a-1. | 2465.57 |
| fold-15-24-1 | Build | Rank | 1 | Fold | 41  | 1894.865 | 45.78 | 41.39 | aADdcCFfbBEegGHh | aDcFbEgH | +B0.-A0.+B-2.-a0.+B-1.-B-3.+B-4.-a-1. | 2580.29 |
| fold-11-2-1  | Build | Rank | 1 | Fold | 241 | 1894.919 | 41.97 | 45.15 | aACcdDEebBFfgGHh | aCdEbFgH | +B0.-A0.+B-2.-a0.+B-1.-B-3.+B-4.-a-1. | 2051.38 |
| fold-11-3-1  | Build | Rank | 1 | Fold | 241 | 1894.919 | 41.97 | 45.15 | aACcdDEebBFfgGHh | aCdEbFgH | +B0.-A0.+B-2.-a0.+B-1.-B-3.+B-4.-a-1. | 2140.83 |

reranked best.list

|              |       |      |   |      |     |          |       |       |                  |          |                                       |         |
|--------------|-------|------|---|------|-----|----------|-------|-------|------------------|----------|---------------------------------------|---------|
| fold-11-3-1  | Build | Rank | 1 | Fold | 241 | 1894.919 | 41.97 | 45.15 | aACcdDEebBFfgGHh | aCdEbFgH | +B0.-A0.+B-2.-a0.+B-1.-B-3.+B-4.-a-1. | 2140.83 |
| fold-11-2-1  | Build | Rank | 1 | Fold | 241 | 1894.919 | 41.97 | 45.15 | aACcdDEebBFfgGHh | aCdEbFgH | +B0.-A0.+B-2.-a0.+B-1.-B-3.+B-4.-a-1. | 2051.38 |
| fold-15-3-1  | Build | Rank | 1 | Fold | 101 | 1899.696 | 42.17 | 45.04 | aACcdDEebBFfgGHh | aCdEbFgH | +B0.-A0.+B-2.-a0.+B-1.-B-3.+B-4.-a-1. | 2161.64 |
| fold-15-2-1  | Build | Rank | 1 | Fold | 101 | 1899.696 | 42.17 | 45.04 | aACcdDEebBFfgGHh | aCdEbFgH | +B0.-A0.+B-2.-a0.+B-1.-B-3.+B-4.-a-1. | 2956.94 |
| fold-14-17-2 | Build | Rank | 2 | Fold | 441 | 1427.709 | 32.29 | 44.22 | aAeEFfgGHhdDBbcC | aeFgHdBc | +B0.+A0.-B-3.+a0.-B-4.+B-2.-B-1.+a+1. | 1973.11 |
| fold-14-16-2 | Build | Rank | 2 | Fold | 441 | 1427.709 | 32.29 | 44.22 | aAeEFfgGHhdDBbcC | aeFgHdBc | +B0.+A0.-B-3.+a0.-B-4.+B-2.-B-1.+a+1. | 1281.53 |
| fold-13-3-1  | Build | Rank | 1 | Fold | 241 | 1942.635 | 43.94 | 44.22 | aACcdDEebBFfgGHh | aCdEbFgH | +B0.-A0.+B-2.-a0.+B-1.-B-3.+B-4.-a-1. | 2640.01 |
| fold-13-2-1  | Build | Rank | 1 | Fold | 241 | 1942.635 | 43.94 | 44.22 | aACcdDEebBFfgGHh | aCdEbFgH | +B0.-A0.+B-2.-a0.+B-1.-B-3.+B-4.-a-1. | 3784.87 |
| fold-12-17-3 | Build | Rank | 3 | Fold | 441 | 1426.004 | 32.34 | 44.10 | aAeEFfgGHhdDBbcC | aeFgHdBc | +B0.+A0.-B-3.+a0.-B-4.+B-2.-B-1.+a+1. | 3293.05 |
| fold-12-16-3 | Build | Rank | 3 | Fold | 441 | 1426.004 | 32.34 | 44.10 | aAeEFfgGHhdDBbcC | aeFgHdBc | +B0.+A0.-B-3.+a0.-B-4.+B-2.-B-1.+a+1. | 1611.72 |



1cozA (126) = +B+0.-A+0.+B-1.-A-1.+B-2.-a+0.+B+1.-a+1.+B+2.[+-]A+1.

**Chorismate mutase** has a mini-Rossmann type fold plus a carboxy-terminal helix that packs across to the opposing monomer in this dimeric structure. In the definition of the correct fold, this terminal helix was considered correct if it packed back onto the domain either in an antiparallel or parallel connection, with the latter being a better approximation to the native structure. This protein has quite variable secondary structure predictions making it a difficult target.

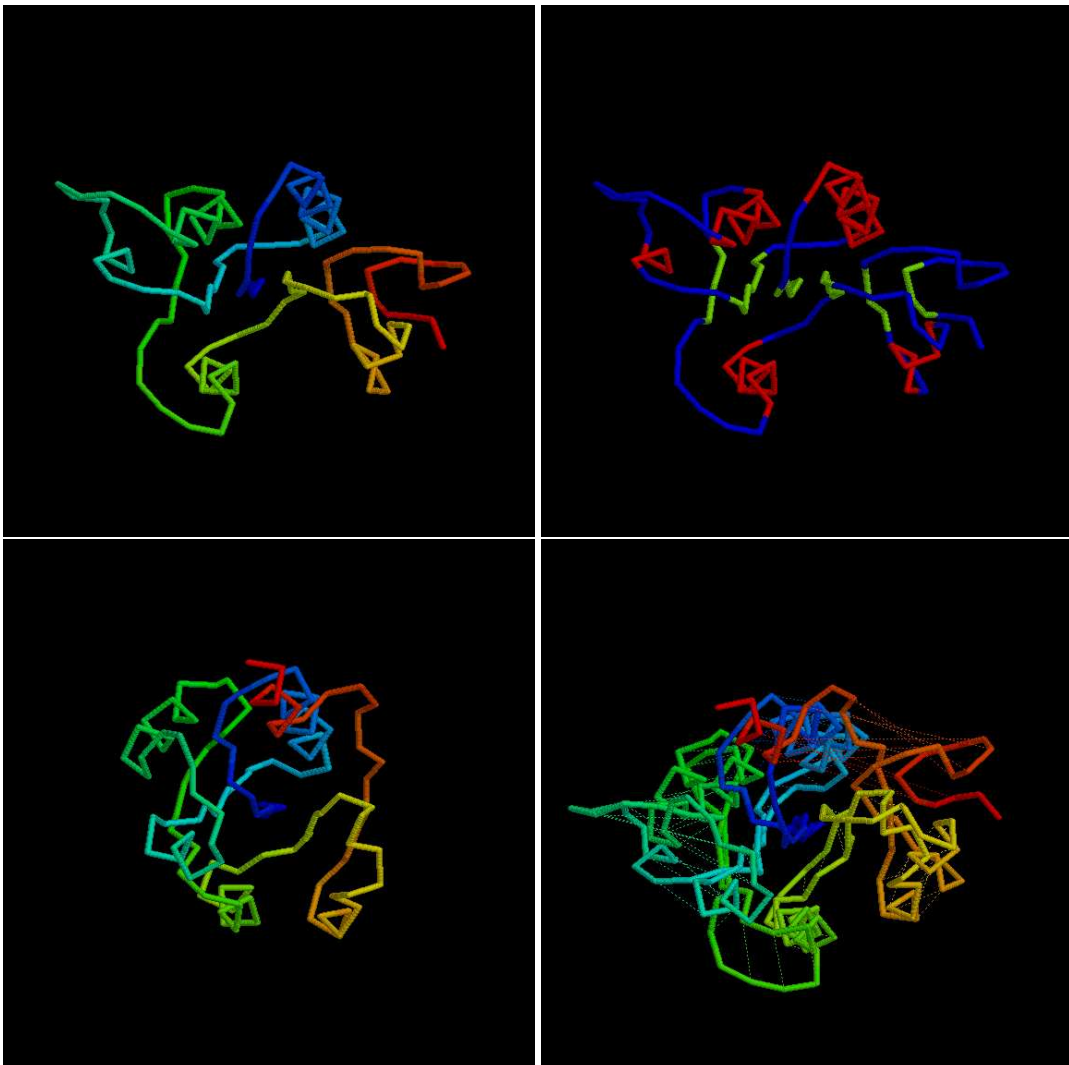

**R**VYMDGCF **D**MMHYGHCN **A**LQARAL **G**DQLVVG **V**SD **E**EI **A**NGKP **P**VTP **L**HERMTMVK **K**VKW **D**EVI **S**DAPY **E**DFMKKLF **D**EYQI **D**YI **I**HGDDP **C**VT **D**AYALAKAGRY **K**QRT **E**GV **S**TDI **V**GRM  
**P**VRYADGI **F**DMFHS **G**HARALM **O**AKCLNT **Y**LI **V**GVCS **D**DLTK **F**KGF **T**VMNE **D**ERYD **V**ACHCR **Y**VDV **V**RRNAP **W**PEFL **A**EHR **I**DFVA **H**DDI **P**YI **D**DYR **H**I **K**AGM **F**APRTEGI **S**TS **D**I **T**RI  
**R**IYADGV **F**DLF **F**HLGH **M**KQLE **O**CKKAN **V**TLI **V**GVPS **D**KI **T**KL **K**GL **T**VLTD **K**QRCET **L**THCR **W**DE **V**VPNAP **W**PEFL **L**EHKI **D**YVA **H**DDI **P**YV **D**I **Y**KPI **K**MG **F**LTR **T**NGV **S**TS **D**I **T**KI  
**R**IYADGV **F**DLF **F**HVGH **M**RQLE **O**AKKAD **V**HL **M**GV **T**GD **E**ET **N**RKGL **T**VL **S**GA **E**AES **V**RHCK **W**DE **V**I **P**NC **W**PEFL **D**EHQI **D**YVA **H**DDL **P**Y **G**DDI **Y**API **K**Q **K**FL **V**RT **E**GV **S**TT **G**I **T**RI  
**E**TI **V**FT **N**GC **D**I **L**HAGH **V**RY **L**AQA **K**ARG **D**RL **V**GL **N**ND **S**I **R**L **K**GAR **P**I **N**P **D**ER **A**MV **S**A **L**SS **V**D **W**I **P**FGS **A**DT **P**AK **L**I **E**Q **I**S **P**D **L**V **K**G **G**D **Y**T **V**E **A**EH **V**LL **H**G **K**V **E**V **L**E **F**L **D**GC **S**TS **K**V **S**KI  
**E**KI **V**FT **N**GC **D**I **L**HAGH **V**T **Y**L **E**QA **R**AQ **G**DR **L**I **V**GV **N**DD **S** **V**R **L**K **G**AR **P**I **N**S **V**DR **M**AV **L**AG **L**GA **D**V **W**VP **F**A **D**T **P**ER **L**LE **Q**V **R**P **D**VL **V**K **G**D **D**Y **G**VE **A**QI **V**K **A**Y **G**E **V**R **V**L **G**L **V**EN **S** **T**T **A**I **V**E **K**I  
**E**KV **V**M **T**NG **D**I **L**HAGH **V**S **Y**M **N**AA **E**LG **D**RL **I** **V**AV **N**T **D**E **S** **V**R **L**K **G**P **R**P **V**N **P** **D**RR **M**AV **L**AG **L**GA **D**V **W**VP **F**S **D**T **P**OR **L**I **S**E **V**L **P**S **L**V **K**G **D**D **Y**K **P**E **G**A **E**V **I** **A**A **G**E **V**K **V**L **N**F **E**D **G**C **S** **T**T **E**I **I** **K**A **I**  
**E**KV **V**M **T**NG **D**I **L**HAGH **V**S **Y**L **N**AA **K**LG **D**RL **I** **V**AV **N**T **D**E **S** **V**R **L**K **G**P **R**P **V**N **P** **D**RR **M**AV **L**AG **L**GA **D**V **W**VP **F**S **D**T **P**OR **L**I **S**E **V**L **P**D **L**V **K**G **D**D **Y**K **P**E **G**E **V**I **A**A **G**E **V**K **V**L **N**F **E**D **G**C **S** **T**T **E**I **I** **D**A **I**  
**K**R **V**I **T**GT **F**DF **V**F **H**I **G**H **I** **N** **L**ER **C**AS **L**GD **T**LI **V**GV **S** **D**EL **N**S **K**K **Q**RY **P**I **Y**DO **E**S **R**L **K**I **V**Q **S** **L**K **F** **V**DE **V**F **V**EH **S** **L**E **K**K **R**E **Y**I **E**F **Y**R **G**D **M**L **A**M **G**D **D**W **K**G **R**F **D**E **F**N **D**I **C**D **V**V **Y**F **P**R **T**P **S**I **S**T **T**E **I** **I** **E**  
**K**R **V**I **T**GT **F**DF **V**F **H**I **G**H **I** **N** **L**ER **A**KS **O**GD **Y**LI **V**GV **S** **D**K **L**NE **K**K **G**R **Y**P **V**YS **Q**S **O**R **M**K **I** **S**A **L**S **C**D **V**E **F** **V**E **E**S **L**E **K**K **P**D **Y**I **Q**E **Y**N **A**N **V**L **V**M **G**D **D**W **S**G **K**F **D**T **M**K **A**F **C**D **V**V **L**P **R**T **P**S **I** **S**T **T**E **I** **I** **E**  
**K**I **V**I **T**GT **F**DL **F**H **I** **G**H **L**R **L** **F**ER **A**KE **Y**GD **K**L **I** **V**AV **S**T **D**E **F**N **S** **V**K **G**K **V**L **I** **P**E **O** **A**E **I** **V**K **S** **I** **R**C **D**I **V**I **P**E **M**S **W**E **Q**K **V**E **D**V **N**K **H**H **V**D **T**L **I** **M**G **K**D **W**E **G**O **F** **D**E **L**K **R**F **C**E **V**V **L** **D**R **T**O **D**I **S** **T**T **R**L **K**S **S**L  
**K**R **V**I **T**GT **F**DL **L**H **Y**G **H**I **N**L **K**R **A**K **O**LG **D**Y **L**I **V**V **S** **D**E **F**N **E** **K**K **N**K **V**C **Y**F **N**F **H**R **K**N **L** **V**E **A**I **R**Y **D**L **V**I **P**E **T**S **W**E **Q**K **T**D **I** **K**E **Y**R **I** **D**T **F** **V**M **G**D **D**W **K**G **F** **D**Y **L** **K**E **E** **G**E **V**V **L**P **R**T **K**E **I** **S**T **T**K **I** **K**ED **L**  
**M**R **R**V **I** **T**GT **F**DL **L**H **Y**G **H**I **N**L **K**R **A**K **A**Y **G**D **Y**L **I** **V**GL **S**T **D**E **F**N **A**G **K**K **A**Y **F**S **Y**D **O**R **K**E **L**E **S** **L**R **Y**D **L**V **I** **P**E **Q**T **W**E **Q**K **R**N **D**I **L**L **Y**Q **V**D **T**F **V**M **G**S **D**W **A**G **K**F **D**D **L**S **D**I **C**D **V**I **Y**L **P**R **T**P **E**I **S**S **K**I **K**N **D**L  
**M**K **K**V **I** **T**GT **F**DL **L**H **W**G **H**I **N**L **K**R **A**K **D**LG **D**Y **L**I **V**A **S** **S** **D**E **F**N **A**L **Q**K **E** **A**Y **H**S **F**E **N**R **K**M **I** **L**E **A**I **R**Y **D**E **V**I **P**E **N**T **W**E **Q**K **V**E **D**V **Q**K **Y**D **I** **D**V **F** **V**M **G**D **D**W **R**G **K**F **D**L **K**E **Y**C **E** **V**V **L**P **R**T **A**G **I** **S**T **T**K **I** **K**T **E**L  
**M**K **K**V **I** **T**GT **F**DL **L**H **W**G **H**I **K**L **E**R **A**K **O**LG **D**Y **L**V **A**I **S**T **D**E **F**N **I** **O** **K**Q **K**A **Y**H **S** **Y**E **H**R **K**L **I** **L**E **T**I **R**Y **D**E **V**I **P**E **K**N **W**E **Q**K **K**O **D**I **I** **D**H **N**I **D**V **F** **V**M **G**D **D**W **E**G **K**F **D**L **K**D **Q**C **E** **V**V **L**P **R**T **E**G **I** **S**T **T**K **I** **K**E **E**I

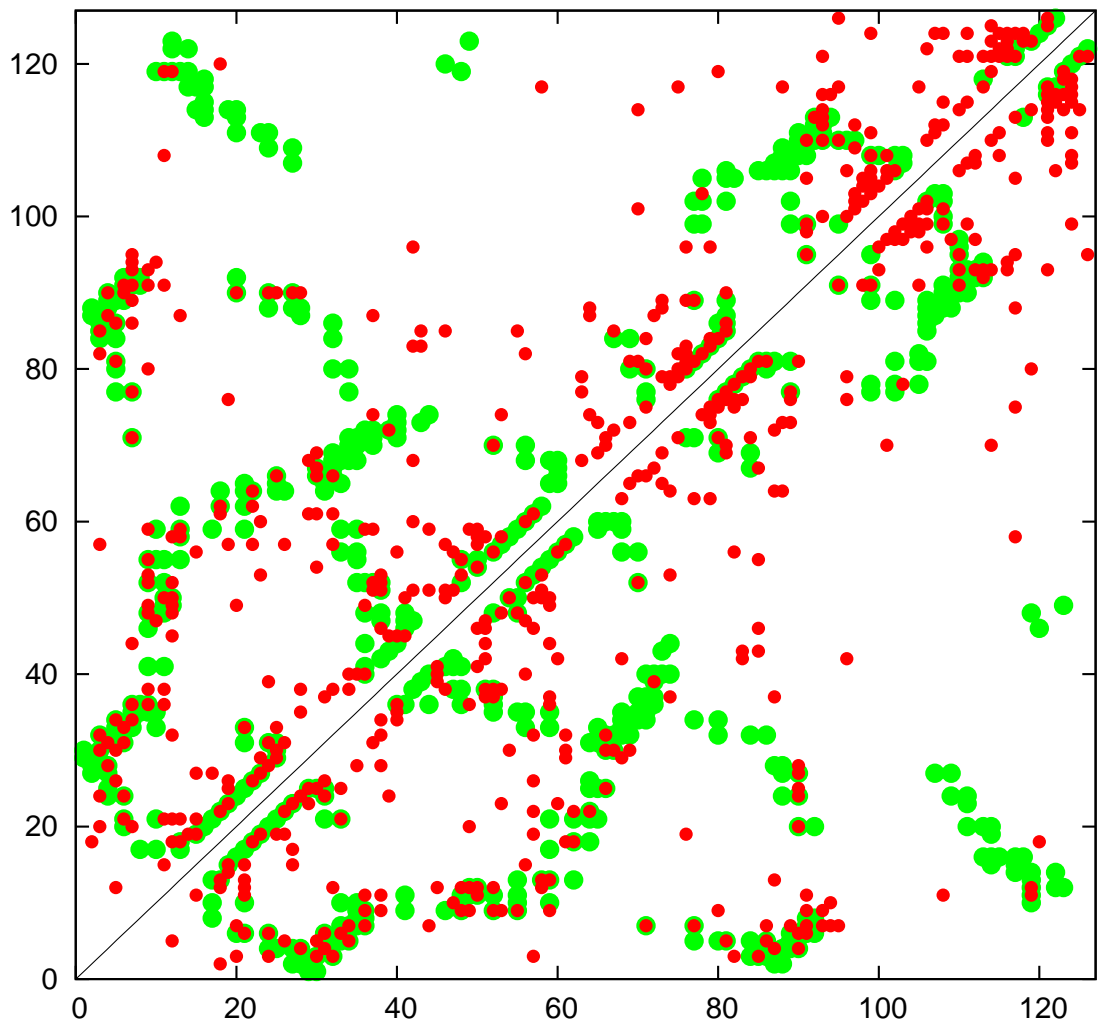

full.list

|                                                              |         |       |       |                    |                                                         |         |
|--------------------------------------------------------------|---------|-------|-------|--------------------|---------------------------------------------------------|---------|
| builddicozA/folds/fold-1-0-10:REMARK Build Rank 17 Fold 115  | 240.544 | 14.93 | 16.11 | cCDdaABbfFEeHhiIGg | cDaBFEHIG +B+0.-A+0.+B-1.-a+0.+a+1.-B+1.-A+1.+B+3.-B+2. | 237.255 |
| builddicozA/folds/fold-1-0-40:REMARK Build Rank 58 Fold 55   | 171.304 | 13.27 | 12.91 | GghHiiFfbBeEDdaACc | GhIFbeDaC +B+0.-A+0.+B-1.+a+0.-a+1.-B+1.+A+1.-B+3.+B+2. | 163.967 |
| builddicozA/folds/fold-1-0-60:REMARK Build Rank 87 Fold 31   | 144.405 | 13.61 | 10.61 | eEDdaABbFCcchHiIGg | eDaBfCHIG +B+0.-A+0.+B-2.-a+0.+a+1.-B-1.+A+1.-B+2.-B+1. | 135.696 |
| builddicozA/folds/fold-1-10-20:REMARK Build Rank 20 Fold 263 | 315.317 | 17.64 | 17.88 | AacCDdiiEeBbgGffHh | AcDiEBgFH +B+0.-A+0.+B-2.-a+0.+a+1.+B-1.-A-1.+B+3.+B-4. | 311.742 |
| builddicozA/folds/fold-1-10-50:REMARK Build Rank 50 Fold 70  | 246.843 | 15.09 | 16.36 | ffIihHGgcCDdeEBbaA | fIhGcDeBa +B+0.-A+0.+B-1.-a+0.+a+1.-B+1.+A+1.-B+2.+B+3. | 240.084 |
| builddicozA/folds/fold-1-1-10:REMARK Build Rank 17 Fold 115  | 240.544 | 14.93 | 16.11 | cCDdaABbFEeHhiIGg  | cDaBFEHIG +B+0.-A+0.+B-1.-a+0.+a+1.-B+1.-A+1.+B+3.-B+2. | 237.067 |
| builddicozA/folds/fold-1-11-20:REMARK Build Rank 20 Fold 263 | 315.317 | 17.64 | 17.88 | AacCDdiiEeBbgGffHh | AcDiEBgFH +B+0.-A+0.+B-2.-a+0.+a+1.+B-1.-A-1.+B+3.+B-4. | 311.506 |
| builddicozA/folds/fold-1-11-30:REMARK Build Rank 30 Fold 49  | 286.511 | 15.95 | 17.96 | DdGghHiieEffCcaABb | DGhIefCaB +B+0.+A+0.-B-2.+a+0.-a+1.-B-1.+A+1.-B+2.+B+1. | 282.013 |
| builddicozA/folds/fold-1-1-60:REMARK Build Rank 87 Fold 31   | 144.405 | 13.61 | 10.61 | eEDdaABbFCcchHiIGg | eDaBfCHIG +B+0.-A+0.+B-2.-a+0.+a+1.-B-1.+A+1.-B+2.-B+1. | 135.519 |
| builddicozA/folds/fold-1-2-10:REMARK Build Rank 16 Fold 15   | 236.609 | 14.48 | 16.34 | CcdDAabBFfeEHhIigG | CdAbFeHIG +B+0.-A+0.+B-1.-a+0.+a+1.-B+1.+A+1.+B+3.-B+2. | 233.115 |

best.list

|                                   |         |       |       |                        |                                                                     |         |
|-----------------------------------|---------|-------|-------|------------------------|---------------------------------------------------------------------|---------|
| fold-17-29-1 Build Rank 1 Fold 4  | 943.272 | 32.18 | 29.32 | EefFGgJjiIhHDdbBcCAa   | EFGjIhDbCa +B+0.-A+0.+B-1.-A-1.+B-2.-a+0.+B+1.-a+1.+B+2.-B+3.       | 1852.64 |
| fold-17-28-1 Build Rank 1 Fold 4  | 943.272 | 32.18 | 29.32 | EefFGgJjiIhHDdbBcCAa   | EFGjIhDbCa +B+0.-A+0.+B-1.-A-1.+B-2.-a+0.+B+1.-a+1.+B+2.-B+3.       | 1892.1  |
| fold-17-28-2 Build Rank 2 Fold 1  | 941.757 | 29.93 | 31.46 | EefFGgJjiIhHDdbBAaAc   | EFGjIhDbAc +B+0.-A+0.+B-1.-A-1.+B-2.-a+0.+B+1.-a+1.+B+3.-B+2.       | 2922.51 |
| fold-17-29-2 Build Rank 2 Fold 1  | 941.757 | 29.93 | 31.46 | EefFGgJjiIhHDdbBAaAc   | EFGjIhDbAc +B+0.-A+0.+B-1.-A-1.+B-2.-a+0.+B+1.-a+1.+B+3.-B+2.       | 2761.17 |
| fold-25-14-1 Build Rank 1 Fold 37 | 911.103 | 26.48 | 34.41 | FFDdhHkKggJjIieEBbcCAa | fDhKgjIeBcA +B+0.-A+0.+B-1.-A-2.-A-1.+B-2.-a+0.+B+1.-a+1.+B+2.-B+3. | 2226.68 |
| fold-25-15-1 Build Rank 1 Fold 37 | 911.103 | 26.48 | 34.41 | FFDdhHkKggJjIieEBbcCAa | fDhKgjIeBcA +B+0.-A+0.+B-1.-A-2.-A-1.+B-2.-a+0.+B+1.-a+1.+B+2.-B+3. | 2802.87 |
| fold-17-14-1 Build Rank 1 Fold 14 | 902.860 | 31.46 | 28.70 | eEFfgGjjiIHhdDBbaACc   | eFGjiHdBaC +B+0.-A+0.+B-1.-A-1.+B-2.-a+0.+B+1.-a+1.+B+3.-B+2.       | 2483.21 |
| fold-17-15-1 Build Rank 1 Fold 14 | 902.860 | 31.46 | 28.70 | eEFfgGjjiIHhdDBbaACc   | eFGjiHdBaC +B+0.-A+0.+B-1.-A-1.+B-2.-a+0.+B+1.-a+1.+B+3.-B+2.       | 2747.42 |
| fold-17-29-3 Build Rank 3 Fold 7  | 874.379 | 25.70 | 34.02 | EefFGgJjiIhHDdbBAaAc   | EFGjIhDbAc +B+0.-A+0.+B-1.-A-1.-B-2.+a+0.+B+1.-a+1.+B+3.-B+2.       | 2205.77 |
| fold-17-28-3 Build Rank 3 Fold 7  | 874.379 | 25.70 | 34.02 | EefFGgJjiIhHDdbBAaAc   | EFGjIhDbAc +B+0.-A+0.+B-1.-A-1.-B-2.+a+0.+B+1.-a+1.+B+3.-B+2.       | 1886.78 |

reranked best.list

|                                   |         |       |       |                        |                                                                     |         |
|-----------------------------------|---------|-------|-------|------------------------|---------------------------------------------------------------------|---------|
| fold-25-15-1 Build Rank 1 Fold 37 | 911.103 | 26.48 | 34.41 | FFDdhHkKggJjIieEBbcCAa | fDhKgjIeBcA +B+0.-A+0.+B-1.-A-2.-A-1.+B-2.-a+0.+B+1.-a+1.+B+2.-B+3. | 2802.87 |
| fold-25-14-1 Build Rank 1 Fold 37 | 911.103 | 26.48 | 34.41 | FFDdhHkKggJjIieEBbcCAa | fDhKgjIeBcA +B+0.-A+0.+B-1.-A-2.-A-1.+B-2.-a+0.+B+1.-a+1.+B+2.-B+3. | 2226.68 |
| fold-6-1-6 Build Rank 6 Fold 125  | 634.089 | 18.44 | 34.39 | eEFfcCBbAadDgGHhIiJj   | eFcBADgHij +B+0.-A+0.+B-1.-A-1.-B-2.+a+0.+B+1.-a+1.-B+2.+A+1.       | 1793.28 |
| fold-6-0-6 Build Rank 6 Fold 125  | 634.089 | 18.44 | 34.39 | eEFfcCBbAadDgGHhIiJj   | eFcBADgHij +B+0.-A+0.+B-1.-A-1.-B-2.+a+0.+B+1.-a+1.-B+2.+A+1.       | 1780.15 |
| fold-17-29-3 Build Rank 3 Fold 7  | 874.379 | 25.70 | 34.02 | EefFGgJjiIhHDdbBAaAc   | EFGjIhDbAc +B+0.-A+0.+B-1.-A-1.-B-2.+a+0.+B+1.-a+1.+B+3.-B+2.       | 2205.77 |
| fold-17-28-3 Build Rank 3 Fold 7  | 874.379 | 25.70 | 34.02 | EefFGgJjiIhHDdbBAaAc   | EFGjIhDbAc +B+0.-A+0.+B-1.-A-1.-B-2.+a+0.+B+1.-a+1.+B+3.-B+2.       | 1886.78 |
| fold-6-1-2 Build Rank 2 Fold 123  | 766.177 | 22.76 | 33.66 | eEFfcCBbAadDgGHhIiJj   | eFcBADgHij +B+0.-A+0.+B-1.-A-1.-B-2.+a+0.+B+1.-a+1.+B+2.-A+1.       | 1497.53 |
| fold-25-21-1 Build Rank 1 Fold 73 | 774.002 | 23.07 | 33.55 | fFEehHkKiIjJGgdCcbBAa  | fEhKIjGdCbA +B+0.-A+0.+B-1.-A-2.-A-1.+B-2.-a+0.+B+1.-a+1.+B+2.-B+3. | 3096.44 |
| fold-25-20-1 Build Rank 1 Fold 73 | 774.002 | 23.07 | 33.55 | fFEehHkKiIjJGgdCcbBAa  | fEhKIjGdCbA +B+0.-A+0.+B-1.-A-2.-A-1.+B-2.-a+0.+B+1.-a+1.+B+2.-B+3. | 2696.88 |
| fold-6-5-3 Build Rank 3 Fold 13   | 782.472 | 23.75 | 32.95 | EefFcCbBaAdDgGHhIiJj   | EfCbADgHij +B+0.-A+0.+B-1.-A-1.-B-2.+a+0.+B+1.-a+1.+B+2.-A+1.       | 2224.05 |

3chyA (128) = +B+0.-A+0.+B-1.-a+0.+B+1.-a+1.+B+2.-a+2.+B+3.-A+1.

The chemotaxis Y protein (CheY) has a compact flavodoxin-like fold that generally predicts well using just secondary structure prediction methods, or 3D prediction both with and without correlated mutation data.

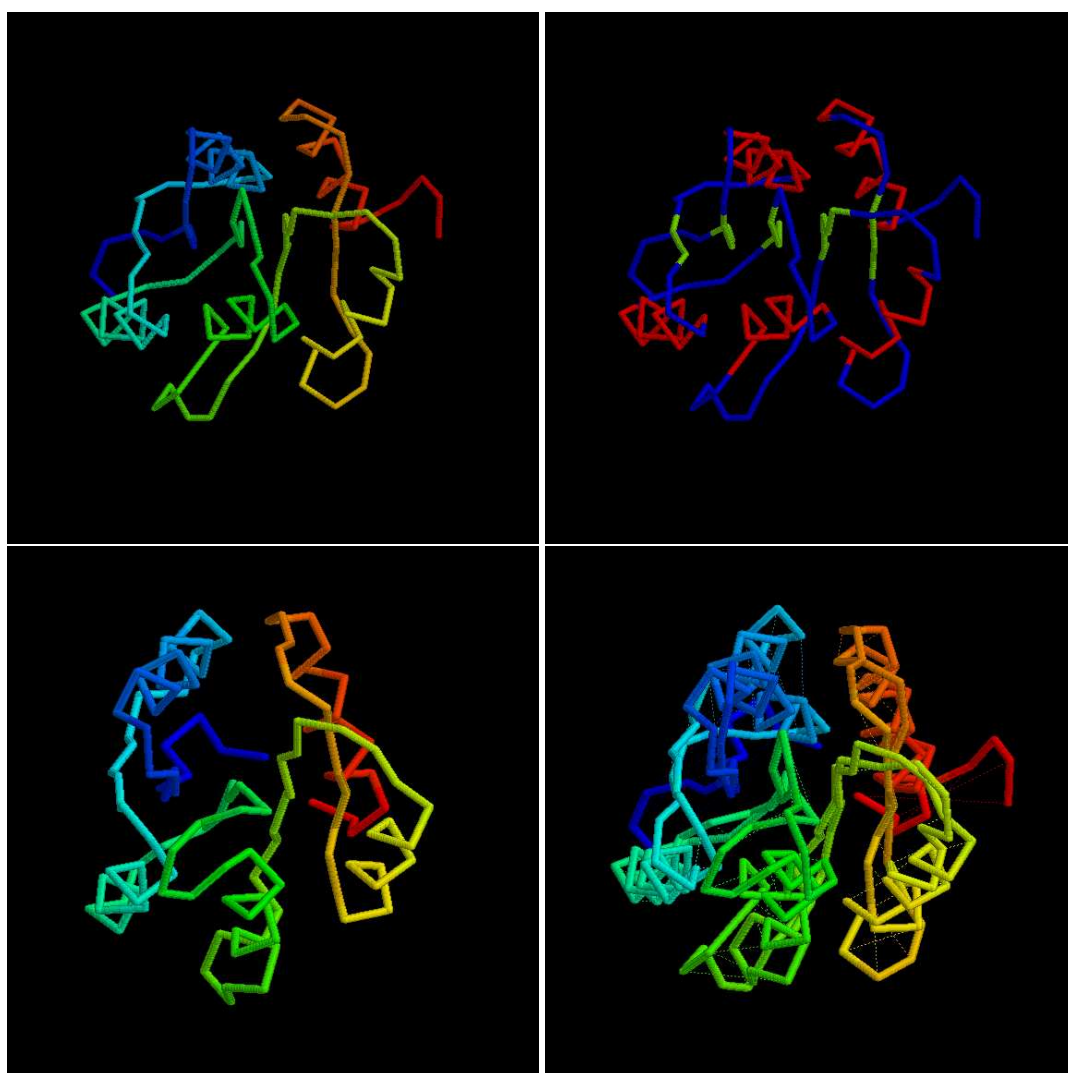

VLI V DDE API REMI AVALEMAGYQ CLEAENANQAHGLI VDK PDMVLLDWMMP GAS GI EFARRI RKDET ADI P I I M L T AKGD EDNKI KGLE AGVDDYI TKPFS PRELVARLKAVLRR  
RI LVVDE API REMI CFVLEQKGYQ AVEAEDYDS AMS KLA EF PDLVLLDWMMP P GGS GI NLI KHKREEM RNI PVVML TARGE EEDKVRGLE VGADDDYI TKPFS PKELVARLKAVI RRV  
RI LI VEDE LAI REML AFVLE QHGFT TTTAEDFDS ALDMLSEY PDLVLLDWMMP P GGS GI QLAKK RQDEF RHI PVI ML TARGE EEDKVRGLE VGADDDYI TKPFS PKELVARI KAVMRR  
TKETKI LVVDE ARI RRLKMYLERENYK IEEAENGDEAI DKALGD YDLI LLDL MMP GTDGI EVCQVRD KKATP I I M L T AKGEEANRVQGFVGTDDYI VKPFS PREVLRVKALLRR  
NRKEKI LVVDE ASI RRI LETRLS MI GYD VVT AADGEEALE VFS RH PDLVLLDWMMP KLDGYGVCOELKK DS DVP I I M L T ALGDVADRI TGLELGADDDYI VKPFS PKELEARI RSVLRR  
KYYKVLV DDES DMRLQVGMVLDNFGEY WDEAENKKEALLKLEEH YDFVI LDI MMP EMDGI AVCKEIKK TS DI P I I F L T AKGEEWNRVNGLRNGADDDYI VKPFS PGELI ARMEAVLRR  
VKI LVV DDES TMRR I I KNTLQRLGHQEI LEAEHGLEAWNLMAQSDI DVLI TDWNMP EMN GLELVKVR AEOKY VDMPI I MVT TEGGKAEVI TALKAGVNNYI VKPFT PQVLKEKLEDVL  
VDLNMKLI LVDDYKTMRLRI I RNLLRQLGFNNI DEAMDGS AAL QML RTGGYGLVI SDWNMPEMT GLQLLREVRADGK KSLPFI MVTAESKSENVIAAKEAGVSNYI VKPFNAETLKAKMSQVI  
VDKNNMVL I VDDYKTMRLRI I RNLLKQLGFNNVDEATDGAMALQMLRVGNYGLVI SDWNMPEMT GLQLLREVRADAK KPVPFI MVTAESKSENVIAAKEAGVSNYI VKPFNAETLKTMTSVL  
DLNMKVLV DDES TMRR I I KNI LRQLGFNNVVEADDGT TAWEMI NKEKI DFVVS DWNMP QMTGI ELLRKYR AESEY SELPFLMVTAEAQOENI EAVQAKVSNYI VKPFT AETMKQKI DKI FD  
DRDMNI LVV DDES TMRR I I KNI LRQLGFNNVVEADDGT TAWEMI NKEKI DFVVS DWNMP QMTGI ELLRKYR AESEY SELPFLMVTAEAQOENI EAVQAKVSNYI VKPFT AETMKQKI DKI FD  
ADKNI K I LVV DDES TMRR I I KNI LRQLGFNNVVEADDGT TAWEMI NKEKI DFVVS DWNMP QMTGI ELLRKYR AESEY SELPFLMVTAEAQOENI EAVQAKVSNYI VKPFT AETMKQKI DKI FERV  
LRF LI V DDES TMRR I I KNI LRQLGFNNVVEADDGT TAWEMI NKEKI DFVVS DWNMP QMTGI ELLRKYR AESEY SELPFLMVTAEAQOENI EAVQAKVSNYI VKPFT AETMKQKI DKI FERV  
MNKNMRL I LV DDES TMRR I I KNI LRQLGFNNVVEADDGT TAWEMI NKEKI DFVVS DWNMP QMTGI ELLRKYR AESEY SELPFLMVTAEAQOENI EAVQAKVSNYI VKPFT AETMKQKI DKI FERV  
ADKELKFLV DDES TMRR I I KNI LRQLGFNNVVEADDGT TAWEMI NKEKI DFVVS DWNMP QMTGI ELLRKYR AESEY SELPFLMVTAEAQOENI EAVQAKVSNYI VKPFT AETMKQKI DKI FERV

VLI V DDE API REMI AVALEMAGYQ CLEAENANQAHGLI VDK PDMVLLDWMMP GAS GI EFARRI RKDET ADI P I I M L T AKGD EDNKI KGLE AGVDDYI TKPFS PRELVARLKAVLRR  
RI LVVDE API REMI CFVLEQKGYQ AVEAEDYDS AMS KLA EF PDLVLLDWMMP P GGS GI NLI KHKREEM RNI PVVML TARGE EEDKVRGLE VGADDDYI TKPFS PKELVARLKAVI RRV  
RI LI VEDE LAI REML AFVLE QHGFT TTTAEDFDS ALDMLSEY PDLVLLDWMMP P GGS GI QLAKK RQDEF RHI PVI ML TARGE EEDKVRGLE VGADDDYI TKPFS PKELVARI KAVMRR  
TKETKI LVVDE ARI RRLKMYLERENYK IEEAENGDEAI DKALGD YDLI LLDL MMP GTDGI EVCQVRD KKATP I I M L T AKGEEANRVQGFVGTDDYI VKPFS PREVLRVKALLRR  
NRKEKI LVVDE ASI RRI LETRLS MI GYD VVT AADGEEALE VFS RH PDLVLLDWMMP KLDGYGVCOELKK DS DVP I I M L T ALGDVADRI TGLELGADDDYI VKPFS PKELEARI RSVLRR  
KYYKVLV DDES DMRLQVGMVLDNFGEY WDEAENKKEALLKLEEH YDFVI LDI MMP EMDGI AVCKEIKK TS DI P I I F L T AKGEEWNRVNGLRNGADDDYI VKPFS PGELI ARMEAVLRR  
VKI LVV DDES TMRR I I KNTLQRLGHQEI LEAEHGLEAWNLMAQSDI DVLI TDWNMP EMN GLELVKVR AEOKY VDMPI I MVT TEGGKAEVI TALKAGVNNYI VKPFT PQVLKEKLEDVL  
VDLNMKLI LVDDYKTMRLRI I RNLLRQLGFNNI DEAMDGS AAL QML RTGGYGLVI SDWNMPEMT GLQLLREVRADGK KSLPFI MVTAESKSENVIAAKEAGVSNYI VKPFNAETLKAKMSQVI  
VDKNNMVL I VDDYKTMRLRI I RNLLKQLGFNNVDEATDGAMALQMLRVGNYGLVI SDWNMPEMT GLQLLREVRADAK KPVPFI MVTAESKSENVIAAKEAGVSNYI VKPFNAETLKTMTSVL  
DLNMKVLV DDES TMRR I I KNI LRQLGFNNVVEADDGT TAWEMI NKEKI DFVVS DWNMP QMTGI ELLRKYR AESEY SELPFLMVTAEAQOENI EAVQAKVSNYI VKPFT AETMKQKI DKI FD  
DRDMNI LVV DDES TMRR I I KNI LRQLGFNNVVEADDGT TAWEMI NKEKI DFVVS DWNMP QMTGI ELLRKYR AESEY SELPFLMVTAEAQOENI EAVQAKVSNYI VKPFT AETMKQKI DKI FERV  
ADKNI K I LVV DDES TMRR I I KNI LRQLGFNNVVEADDGT TAWEMI NKEKI DFVVS DWNMP QMTGI ELLRKYR AESEY SELPFLMVTAEAQOENI EAVQAKVSNYI VKPFT AETMKQKI DKI FERV  
LRF LI V DDES TMRR I I KNI LRQLGFNNVVEADDGT TAWEMI NKEKI DFVVS DWNMP QMTGI ELLRKYR AESEY SELPFLMVTAEAQOENI EAVQAKVSNYI VKPFT AETMKQKI DKI FERV  
MNKNMRL I LV DDES TMRR I I KNI LRQLGFNNVVEADDGT TAWEMI NKEKI DFVVS DWNMP QMTGI ELLRKYR AESEY SELPFLMVTAEAQOENI EAVQAKVSNYI VKPFT AETMKQKI DKI FERV  
ADKELKFLV DDES TMRR I I KNI LRQLGFNNVVEADDGT TAWEMI NKEKI DFVVS DWNMP QMTGI ELLRKYR AESEY SELPFLMVTAEAQOENI EAVQAKVSNYI VKPFT AETMKQKI DKI FERV

VLI V DDE API REMI AVALEMAGYQ CLEAENANQAHGLI VDK PDMVLLDWMMP GAS GI EFARRI RKDET ADI P I I M L T AKGD EDNKI KGLE AGVDDYI TKPFS PRELVARLKAVLRR  
RI LVVDE API REMI CFVLEQKGYQ AVEAEDYDS AMS KLA EF PDLVLLDWMMP P GGS GI NLI KHKREEM RNI PVVML TARGE EEDKVRGLE VGADDDYI TKPFS PKELVARLKAVI RRV  
RI LI VEDE LAI REML AFVLE QHGFT TTTAEDFDS ALDMLSEY PDLVLLDWMMP P GGS GI QLAKK RQDEF RHI PVI ML TARGE EEDKVRGLE VGADDDYI TKPFS PKELVARI KAVMRR  
TKETKI LVVDE ARI RRLKMYLERENYK IEEAENGDEAI DKALGD YDLI LLDL MMP GTDGI EVCQVRD KKATP I I M L T AKGEEANRVQGFVGTDDYI VKPFS PREVLRVKALLRR  
NRKEKI LVVDE ASI RRI LETRLS MI GYD VVT AADGEEALE VFS RH PDLVLLDWMMP KLDGYGVCOELKK DS DVP I I M L T ALGDVADRI TGLELGADDDYI VKPFS PKELEARI RSVLRR  
KYYKVLV DDES DMRLQVGMVLDNFGEY WDEAENKKEALLKLEEH YDFVI LDI MMP EMDGI AVCKEIKK TS DI P I I F L T AKGEEWNRVNGLRNGADDDYI VKPFS PGELI ARMEAVLRR  
VKI LVV DDES TMRR I I KNTLQRLGHQEI LEAEHGLEAWNLMAQSDI DVLI TDWNMP EMN GLELVKVR AEOKY VDMPI I MVT TEGGKAEVI TALKAGVNNYI VKPFT PQVLKEKLEDVL  
VDLNMKLI LVDDYKTMRLRI I RNLLRQLGFNNI DEAMDGS AAL QML RTGGYGLVI SDWNMPEMT GLQLLREVRADGK KSLPFI MVTAESKSENVIAAKEAGVSNYI VKPFNAETLKAKMSQVI  
VDKNNMVL I VDDYKTMRLRI I RNLLKQLGFNNVDEATDGAMALQMLRVGNYGLVI SDWNMPEMT GLQLLREVRADAK KPVPFI MVTAESKSENVIAAKEAGVSNYI VKPFNAETLKTMTSVL  
DLNMKVLV DDES TMRR I I KNI LRQLGFNNVVEADDGT TAWEMI NKEKI DFVVS DWNMP QMTGI ELLRKYR AESEY SELPFLMVTAEAQOENI EAVQAKVSNYI VKPFT AETMKQKI DKI FD  
DRDMNI LVV DDES TMRR I I KNI LRQLGFNNVVEADDGT TAWEMI NKEKI DFVVS DWNMP QMTGI ELLRKYR AESEY SELPFLMVTAEAQOENI EAVQAKVSNYI VKPFT AETMKQKI DKI FERV  
ADKNI K I LVV DDES TMRR I I KNI LRQLGFNNVVEADDGT TAWEMI NKEKI DFVVS DWNMP QMTGI ELLRKYR AESEY SELPFLMVTAEAQOENI EAVQAKVSNYI VKPFT AETMKQKI DKI FERV  
LRF LI V DDES TMRR I I KNI LRQLGFNNVVEADDGT TAWEMI NKEKI DFVVS DWNMP QMTGI ELLRKYR AESEY SELPFLMVTAEAQOENI EAVQAKVSNYI VKPFT AETMKQKI DKI FERV  
MNKNMRL I LV DDES TMRR I I KNI LRQLGFNNVVEADDGT TAWEMI NKEKI DFVVS DWNMP QMTGI ELLRKYR AESEY SELPFLMVTAEAQOENI EAVQAKVSNYI VKPFT AETMKQKI DKI FERV  
ADKELKFLV DDES TMRR I I KNI LRQLGFNNVVEADDGT TAWEMI NKEKI DFVVS DWNMP QMTGI ELLRKYR AESEY SELPFLMVTAEAQOENI EAVQAKVSNYI VKPFT AETMKQKI DKI FERV

VLI V DDE API REMI AVALEMAGYQ CLEAENANQAHGLI VDK PDMVLLDWMMP GAS GI EFARRI RKDET ADI P I I M L T AKGD EDNKI KGLE AGVDDYI TKPFS PRELVARLKAVLRR  
RI LVVDE API REMI CFVLEQKGYQ AVEAEDYDS AMS KLA EF PDLVLLDWMMP P GGS GI NLI KHKREEM RNI PVVML TARGE EEDKVRGLE VGADDDYI TKPFS PKELVARLKAVI RRV  
RI LI VEDE LAI REML AFVLE QHGFT TTTAEDFDS ALDMLSEY PDLVLLDWMMP P GGS GI QLAKK RQDEF RHI PVI ML TARGE EEDKVRGLE VGADDDYI TKPFS PKELVARI KAVMRR  
TKETKI LVVDE ARI RRLKMYLERENYK IEEAENGDEAI DKALGD YDLI LLDL MMP GTDGI EVCQVRD KKATP I I M L T AKGEEANRVQGFVGTDDYI VKPFS PREVLRVKALLRR  
NRKEKI LVVDE ASI RRI LETRLS MI GYD VVT AADGEEALE VFS RH PDLVLLDWMMP KLDGYGVCOELKK DS DVP I I M L T ALGDVADRI TGLELGADDDYI VKPFS PKELEARI RSVLRR  
KYYKVLV DDES DMRLQVGMVLDNFGEY WDEAENKKEALLKLEEH YDFVI LDI MMP EMDGI AVCKEIKK TS DI P I I F L T AKGEEWNRVNGLRNGADDDYI VKPFS PGELI ARMEAVLRR  
VKI LVV DDES TMRR I I KNTLQRLGHQEI LEAEHGLEAWNLMAQSDI DVLI TDWNMP EMN GLELVKVR AEOKY VDMPI I MVT TEGGKAEVI TALKAGVNNYI VKPFT PQVLKEKLEDVL  
VDLNMKLI LVDDYKTMRLRI I RNLLRQLGFNNI DEAMDGS AAL QML RTGGYGLVI SDWNMPEMT GLQLLREVRADGK KSLPFI MVTAESKSENVIAAKEAGVSNYI VKPFNAETLKAKMSQVI  
VDKNNMVL I VDDYKTMRLRI I RNLLKQLGFNNVDEATDGAMALQMLRVGNYGLVI SDWNMPEMT GLQLLREVRADAK KPVPFI MVTAESKSENVIAAKEAGVSNYI VKPFNAETLKTMTSVL  
DLNMKVLV DDES TMRR I I KNI LRQLGFNNVVEADDGT TAWEMI NKEKI DFVVS DWNMP QMTGI ELLRKYR AESEY SELPFLMVTAEAQOENI EAVQAKVSNYI VKPFT AETMKQKI DKI FD  
DRDMNI LVV DDES TMRR I I KNI LRQLGFNNVVEADDGT TAWEMI NKEKI DFVVS DWNMP QMTGI ELLRKYR AESEY SELPFLMVTAEAQOENI EAVQAKVSNYI VKPFT AETMKQKI DKI FERV  
ADKNI K I LVV DDES TMRR I I KNI LRQLGFNNVVEADDGT TAWEMI NKEKI DFVVS DWNMP QMTGI ELLRKYR AESEY SELPFLMVTAEAQOENI EAVQAKVSNYI VKPFT AETMKQKI DKI FERV  
LRF LI V DDES TMRR I I KNI LRQLGFNNVVEADDGT TAWEMI NKEKI DFVVS DWNMP QMTGI ELLRKYR AESEY SELPFLMVTAEAQOENI EAVQAKVSNYI VKPFT AETMKQKI DKI FERV  
MNKNMRL I LV DDES TMRR I I KNI LRQLGFNNVVEADDGT TAWEMI NKEKI DFVVS DWNMP QMTGI ELLRKYR AESEY SELPFLMVTAEAQOENI EAVQAKVSNYI VKPFT AETMKQKI DKI FERV  
ADKELKFLV DDES TMRR I I KNI LRQLGFNNVVEADDGT TAWEMI NKEKI DFVVS DWNMP QMTGI ELLRKYR AESEY SELPFLMVTAEAQOENI EAVQAKVSNYI VKPFT AETMKQKI DKI FERV

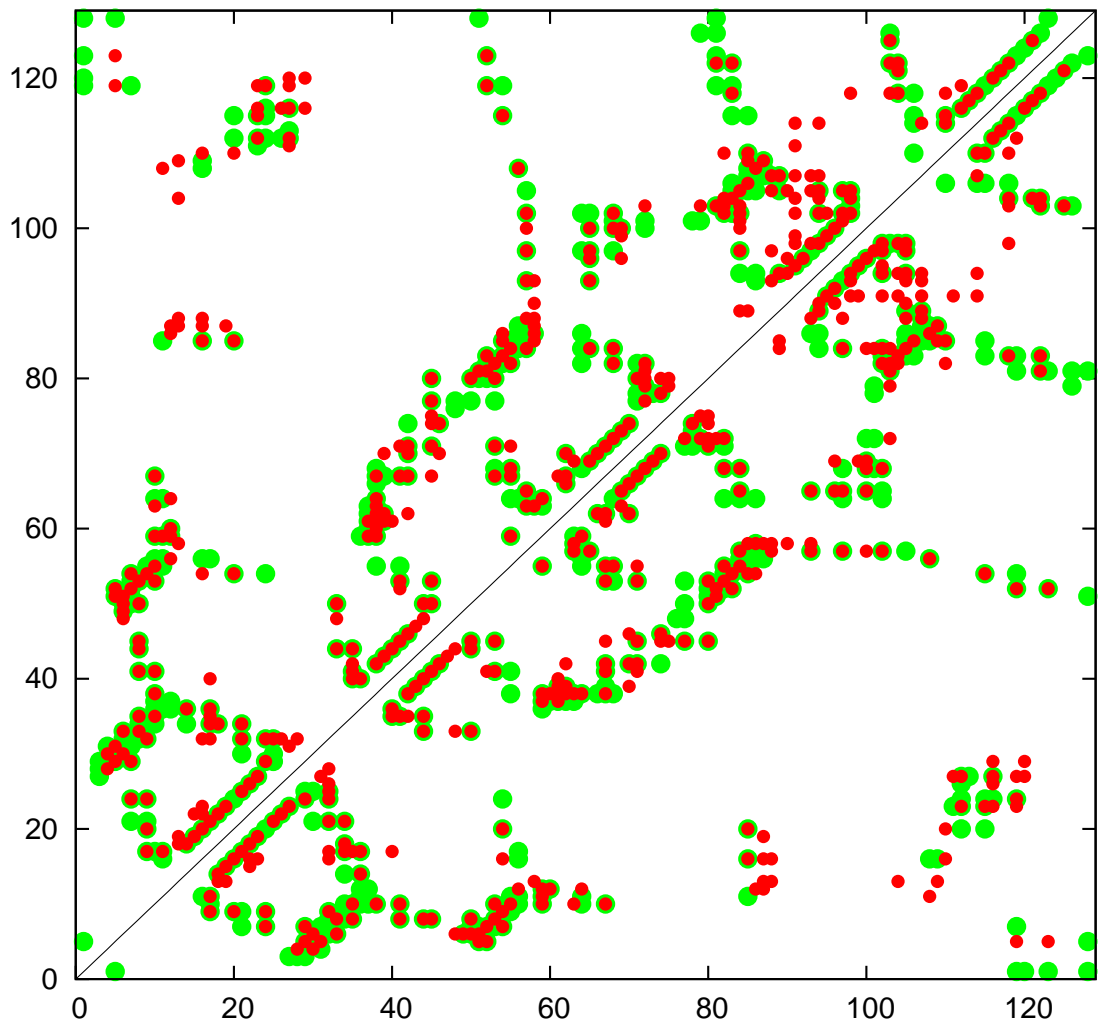

full.list

|                                     |       |      |    |      |      |          |       |       |                      |            |                                                    |         |
|-------------------------------------|-------|------|----|------|------|----------|-------|-------|----------------------|------------|----------------------------------------------------|---------|
| build3chyA/folds/fold-0-0-10:REMARK | Build | Rank | 10 | Fold | 581  | 1095.312 | 26.91 | 40.71 | CcdDAabBEefFGgJJIiHh | CdAbEfGjIh | +B+0.-A+0.+B-1.-a+0.+B+1.-a+1.+B+2.-a+2.-B+3.+A+1. | 1092.33 |
| build3chyA/folds/fold-0-0-20:REMARK | Build | Rank | 20 | Fold | 577  | 975.228  | 24.56 | 39.71 | CcdDAabBEefFIihHGgJj | CdAbEfIhGJ | +B+0.-A+0.+B-1.-a+0.+B+1.-a+1.+B+3.-A+1.+B+2.+a+2. | 970.952 |
| build3chyA/folds/fold-0-1-10:REMARK | Build | Rank | 10 | Fold | 581  | 1095.312 | 26.91 | 40.71 | CcdDAabBEefFGgJJIiHh | CdAbEfGjIh | +B+0.-A+0.+B-1.-a+0.+B+1.-a+1.+B+2.-a+2.-B+3.+A+1. | 1092.49 |
| build3chyA/folds/fold-0-1-20:REMARK | Build | Rank | 20 | Fold | 577  | 975.228  | 24.56 | 39.71 | CcdDAabBEefFIihHGgJj | CdAbEfIhGJ | +B+0.-A+0.+B-1.-a+0.+B+1.-a+1.+B+3.-A+1.+B+2.+a+2. | 971.398 |
| build3chyA/folds/fold-0-1-30:REMARK | Build | Rank | 30 | Fold | 1154 | 911.670  | 22.04 | 41.37 | cCbBAafFeEddgGHhIiJj | cbAFeDgHIj | +B+0.+A+0.-B-1.-A+1.+B+1.-a+0.+B+2.-a+1.+B+3.+A+2. | 906.575 |
| build3chyA/folds/fold-0-2-10:REMARK | Build | Rank | 10 | Fold | 125  | 1055.070 | 25.43 | 41.49 | cCDdaABbeEFfgGHhIiJj | cDaBeFgHIj | +B+0.-A+0.+B-1.-a+0.+B+1.-a+1.+B+2.-A+1.-B+3.+A+2. | 1052.73 |
| build3chyA/folds/fold-0-2-20:REMARK | Build | Rank | 20 | Fold | 165  | 879.030  | 25.56 | 34.39 | cCDdaABbeEFfgGHhIiJj | cDabEhGjIj | +B+0.-A+0.+B-1.-a+0.+B+1.-a+1.+B+2.-A+1.-B+3.+a+1. | 875.247 |
| build3chyA/folds/fold-0-2-30:REMARK | Build | Rank | 30 | Fold | 139  | 773.146  | 21.36 | 36.19 | cCDdaABbeEFfgGHhIiJj | cDabEfGhIj | +B+0.-A+0.+B-1.-a+0.+B+1.-a+1.+B+2.+A+1.-B+3.+A+2. | 768.566 |
| build3chyA/folds/fold-0-3-10:REMARK | Build | Rank | 10 | Fold | 125  | 1055.070 | 25.43 | 41.49 | cCDdaABbeEFfgGHhIiJj | cDaBeFgHIj | +B+0.-A+0.+B-1.-a+0.+B+1.-a+1.+B+2.-A+1.-B+3.+A+2. | 1052.64 |
| build3chyA/folds/fold-0-3-20:REMARK | Build | Rank | 20 | Fold | 165  | 879.030  | 25.56 | 34.39 | cCDdaABbeEFfgGHhIiJj | cDabEhGjIj | +B+0.-A+0.+B-1.-a+0.+B+1.-a+1.+B+2.-A+1.-B+3.+a+1. | 875.359 |

best.list

|            |       |      |   |      |      |          |       |       |                      |            |                                                    |         |
|------------|-------|------|---|------|------|----------|-------|-------|----------------------|------------|----------------------------------------------------|---------|
| fold-0-2-1 | Build | Rank | 1 | Fold | 87   | 1898.612 | 35.55 | 53.41 | CcbBAadDEehHGgJJIiFf | CbAdEhGjIj | +B+0.-A+0.+B-1.-a+0.+B+1.-a+1.+B+2.-a+2.+B+3.-A+1. | 6171.8  |
| fold-0-3-1 | Build | Rank | 1 | Fold | 87   | 1898.612 | 35.55 | 53.41 | CcbBAadDEehHGgJJIiFf | CbAdEhGjIj | +B+0.-A+0.+B-1.-a+0.+B+1.-a+1.+B+2.-a+2.+B+3.-A+1. | 6709.77 |
| fold-0-4-1 | Build | Rank | 1 | Fold | 791  | 1791.719 | 33.75 | 53.09 | cCDdaABbeEFfgGHhIiHh | cDaBeFgJiH | +B+0.-A+0.+B-1.-a+0.+B+1.-a+1.+B+2.-a+2.+B+3.-A+1. | 7400.66 |
| fold-0-5-1 | Build | Rank | 1 | Fold | 791  | 1791.719 | 33.75 | 53.09 | cCDdaABbeEFfgGHhIiHh | cDaBeFgJiH | +B+0.-A+0.+B-1.-a+0.+B+1.-a+1.+B+2.-a+2.+B+3.-A+1. | 8785.25 |
| fold-0-4-2 | Build | Rank | 2 | Fold | 1355 | 1791.443 | 33.75 | 53.07 | GghHIiJjEefFCcbBAadD | GhIjEfCbAd | +B+0.-A+0.+B-1.-a+0.+B+1.-a+1.+B+2.-a+2.+B+3.-A+1. | 6464.43 |
| fold-0-5-2 | Build | Rank | 2 | Fold | 1355 | 1791.443 | 33.75 | 53.07 | GghHIiJjEefFCcbBAadD | GhIjEfCbAd | +B+0.-A+0.+B-1.-a+0.+B+1.-a+1.+B+2.-a+2.+B+3.-A+1. | 7208.71 |
| fold-0-1-1 | Build | Rank | 1 | Fold | 579  | 1736.851 | 33.38 | 52.03 | CcdDAabBEefFGgJJIiHh | CdAbEfGjIh | +B+0.-A+0.+B-1.-a+0.+B+1.-a+1.+B+2.-a+2.+B+3.-A+1. | 5966.08 |
| fold-0-0-1 | Build | Rank | 1 | Fold | 579  | 1736.851 | 33.38 | 52.03 | CcdDAabBEefFGgJJIiHh | CdAbEfGjIh | +B+0.-A+0.+B-1.-a+0.+B+1.-a+1.+B+2.-a+2.+B+3.-A+1. | 6243.38 |
| fold-0-7-1 | Build | Rank | 1 | Fold | 1222 | 1719.575 | 34.62 | 49.67 | CcbBAadDEehHGgJJIiFf | CbAdEhGjIj | +B+0.-A+0.+B-1.-a+0.+B+1.-a+1.+B+2.-a+2.+B+3.-A+1. | 5499.18 |
| fold-0-6-1 | Build | Rank | 1 | Fold | 1222 | 1719.575 | 34.62 | 49.67 | CcbBAadDEehHGgJJIiFf | CbAdEhGjIj | +B+0.-A+0.+B-1.-a+0.+B+1.-a+1.+B+2.-a+2.+B+3.-A+1. | 4496.97 |

reranked best.list

|            |       |      |   |      |      |          |       |       |                      |            |                                                    |         |
|------------|-------|------|---|------|------|----------|-------|-------|----------------------|------------|----------------------------------------------------|---------|
| fold-1-1-1 | Build | Rank | 1 | Fold | 1    | 1685.107 | 31.24 | 53.94 | CcdDAabBEefFGgJJIiHh | CdAbEfGjIh | +B+0.-A+0.+B-1.-a+0.+B+1.-a+1.+B+2.-a+2.+B+3.-A+1. | 6766.11 |
| fold-1-0-1 | Build | Rank | 1 | Fold | 1    | 1685.107 | 31.24 | 53.94 | CcdDAabBEefFGgJJIiHh | CdAbEfGjIh | +B+0.-A+0.+B-1.-a+0.+B+1.-a+1.+B+2.-a+2.+B+3.-A+1. | 5950.19 |
| fold-1-5-1 | Build | Rank | 1 | Fold | 762  | 1665.887 | 31.00 | 53.74 | cCDdaABbeEFfgGHhIiHh | cDaBeFgJiH | +B+0.-A+0.+B-1.-a+0.+B+1.-a+1.+B+2.-a+2.+B+3.-A+1. | 5762.78 |
| fold-1-4-1 | Build | Rank | 1 | Fold | 762  | 1665.887 | 31.00 | 53.74 | cCDdaABbeEFfgGHhIiHh | cDaBeFgJiH | +B+0.-A+0.+B-1.-a+0.+B+1.-a+1.+B+2.-a+2.+B+3.-A+1. | 6430.24 |
| fold-1-5-2 | Build | Rank | 2 | Fold | 1578 | 1665.129 | 31.00 | 53.71 | GghHIiJjEefFCcbBAadD | GhIjEfCbAd | +B+0.-A+0.+B-1.-a+0.+B+1.-a+1.+B+2.-a+2.+B+3.-A+1. | 5486.65 |
| fold-1-4-2 | Build | Rank | 2 | Fold | 1578 | 1665.129 | 31.00 | 53.71 | GghHIiJjEefFCcbBAadD | GhIjEfCbAd | +B+0.-A+0.+B-1.-a+0.+B+1.-a+1.+B+2.-a+2.+B+3.-A+1. | 6198.43 |
| fold-0-3-1 | Build | Rank | 1 | Fold | 87   | 1898.612 | 35.55 | 53.41 | CcbBAadDEehHGgJJIiFf | CbAdEhGjIj | +B+0.-A+0.+B-1.-a+0.+B+1.-a+1.+B+2.-a+2.+B+3.-A+1. | 6709.77 |
| fold-0-2-1 | Build | Rank | 1 | Fold | 87   | 1898.612 | 35.55 | 53.41 | CcbBAadDEehHGgJJIiFf | CbAdEhGjIj | +B+0.-A+0.+B-1.-a+0.+B+1.-a+1.+B+2.-a+2.+B+3.-A+1. | 6171.8  |
| fold-2-1-1 | Build | Rank | 1 | Fold | 1    | 1613.286 | 30.29 | 53.26 | CcdDAabBEefFGgJJIiHh | CdAbEfGjIh | +B+0.-A+0.+B-1.-a+0.+B+1.-a+1.+B+2.-a+2.+B+3.-A+1. | 5077.46 |
| fold-2-0-1 | Build | Rank | 1 | Fold | 1    | 1613.286 | 30.29 | 53.26 | CcdDAabBEefFGgJJIiHh | CdAbEfGjIh | +B+0.-A+0.+B-1.-a+0.+B+1.-a+1.+B+2.-a+2.+B+3.-A+1. | 6251.59 |



1f4pA (148) +B+0.-A+0.+B-1.-a+0.+B+1.-a+1.+B+2.-a+2.+B+3.-A+1.

A classic (short-chain) flavodoxin. Although this protein has the same basic fold as 3chyA, the secondary structure elements are quite distinct both in size and packing and the two proteins are not even remotely homologous.

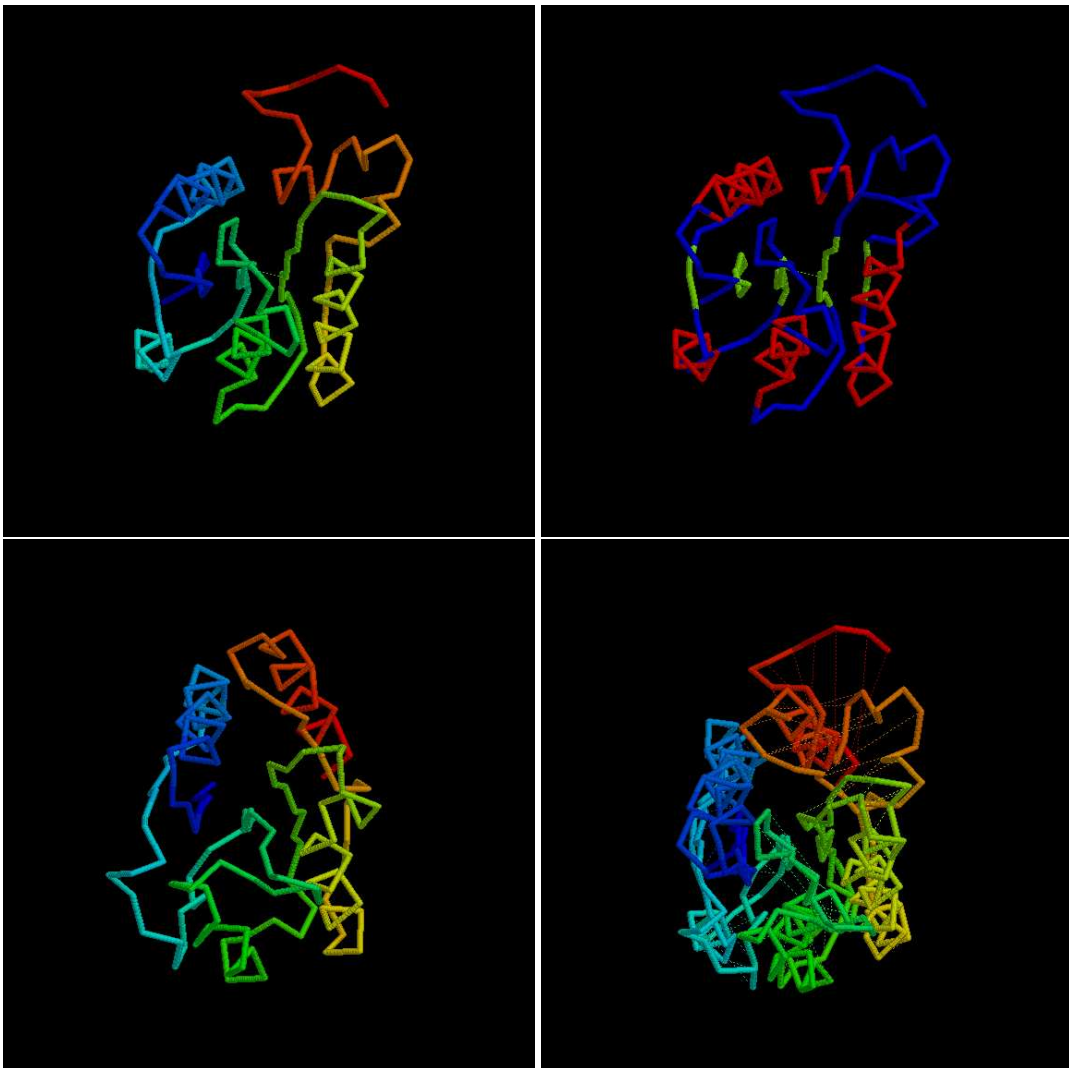

```
I L I T G S T L G S A E Y V A D H L E S C L T E Q G F Q V E L F N O P T I T A Q H S R L I V V T S T H G A G E L P D N I K P F A D I S H Q Q L S Q M Q F G V V G L G S S Y D T F C Y A V D I V E Q T L T A Q C P S V R I D V S Q N F D H D E T A E K W
M L Y A S E T G N A O D T A E R V A R A F R A N G R A V I C L P M D Q F P I S A L P H T Y L L I L L T S T H G R G D P P P A M L P W T A L L S S L E D V H F A L F G L G D S Y E R F C Y A G K M L R R M E Q L G G E F A M G D E R S P N G I E D A F L P W
R R A L V V Y G S E T G N A O D V A E L G R L A V R L R F D T E V A E L D A V T L K Q L L Q F D V V L V A I S T S G O G E L P P N S Q K F W R A I R S A R L Q O M K F A S F L G D T Y P K F N W A H R K L Y N R L I Q L C D R G E S D E Q Q E G I D G A I P W S N K L R Q R L
R L T V V Y G S Q T G N A R R E A E H L A A D A E A G L N V R L R A D T Y P T R E L A N E R L L Y Y V I S T Q E G E D P P D D A I G L V E F L T G R R L P E L K Y A V L G L G D S Y A D F C G V A R R I D E R L A E L G O P R G E A D L D I D S I A V P W
Q T V T I L Y G S Q T G N G R G I A K A L A E K A K A Q G Y S V N L A S M G E Y N V R G L K Q E T L L L L V S T H G E G E A P D D A I E L H K F L A S K R L S N L H Y S V L A L G D S Y E F F C Q T G K D F D A R L S A L G L P L V E C D V D Y E A A A G Q W H A D V L T A V
G K S L I I F A S Q T G N A G V A A L K E E A A A A G I A V E L F D A S D Y K G K H L A K E T H V I I V A S N T G E G E A P D N A I E L H E F L O S K K L D N L H Y G V I G L G D S Y E F F C Q T G K D F D A F L S R G G I E R V D L D V D Y E A P A A E W R K Q A L D
P K V T L L W A S Q T G N E S L A E D Y A T K L M A G F E I R T A C M S D Y P V A S L A G A Q Y V L L M S T F G D G E A P D N G S E F W D A L Q A G S L D G V H F A V L A F G D R Y D Q F C G H G R R L D A R L A E L G C A R V D C D V E F Q H D A D Q W E R V V A R I
K I G L F Y G T Q T G V T O T A E S I Q O E F G G E S I V D L N D I A N A D A S T L N A Y D Y L I G C P T W N V G E L Q S T W E G I Y D D L S V N F Q G K K V A Y F G A G N O Y S D N F O D A M G I L E E K I S S L G G Y W P I E G Y D F N E S K A V R N N O F V G L A I D
I G M F F S D T G N T E R I A K K I O K K I G I N N I D I F D I S N S S K E E M E Y K K L I F G I P T W Y Y G E L Q C D W D F F L Y K E I N F E N K L V A I F G C G D Q Y A E Y F C D A M G I V K E I I S Y K G K Y S T L G Y K F E K S K A L L N K D Y F I G L A I D
I F F G S D T G N T E N I A K M I Q K O L G K D V A D V H D I A K S S K E D L E A Y D I L L L G I P T W Y Y G E A Q C D W D F F P L E E I D F N G K L V A I F G C G D Q A E Y F C D A L G T I R D I I E P R G A D W P T A G Y H F Q A S K G L A D D D H F V G L A I D
V G I F F G S D T G N T E A V A K M I Q K O L G K K L V H V Q D I A K S S K E D I D N F D L L L G I P T W Y Y G E A Q C D W D F F P L E E I D F S T K L V A I F G C G D Q A E Y F C D A M G T V R D I V E A K G G H T S T E S Y E F E A S K A L V A G D D R L F V G L C I D
V G I F F G S D T G N T E A I A K M I Q K O L G K K L V H V Q D I A K S S K E D I N N F D L L L G I P T W Y Y G E A Q C D W D F F P L E E I A D F S T K L V A I F G C G D Q A E Y F C D A M G T V R D I I Q A K G G H W P T E G Y E F E A S K A L V D E N H F V G L C I D
A K I V Y A S M T G N T E E I A D I V A N K L Q E L G H V D I D E C T T V D A S E F E N A D I A V V A T Y T Y G D G D L P D E I V D F Y E D L Q D L D L E G K I Y G V G S G D T F Y D Y F C K S V D D F S E Q F A L T G A E P V K V D L A A E D E D I D R L E A F A E Q L S Q A V
R V L I V F A S M S G N T E D M A E L I K S E L A T D G V E V D M E E M D G Y N A S E L L N Y D G A L I G S Y T W G D G D L P Y E A E D F A E L A E L D T G V I A A V F G S G D R V Y P A F C E A V H T F E S I L R N G A T V T A K L E M F D P N T D E E R A A C
P K A L I Y G S T T G N T E Y A E T I A R E L A D A G Y E V S R D A A S V E A G G L F E G F D L V L L G C S T W G D D S T E L O D D F L P L F D S I E E T G A O G R K V A C F G C G D S S W E Y F C G A V D A I E E K I K N L G A E I V Q D G L R I D G D P R A A R D D I V G M A H D V R G
```

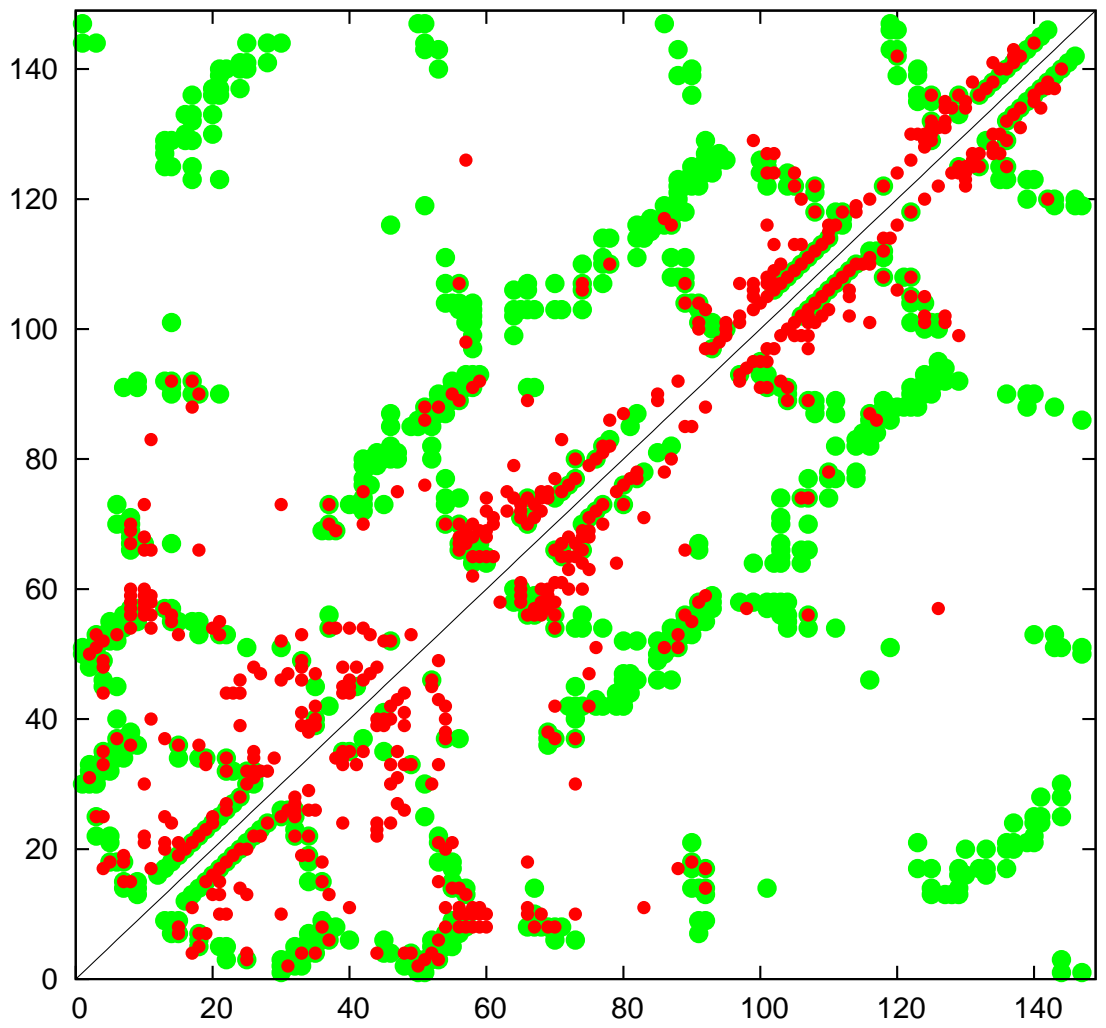

full.list

|                                      |       |      |    |      |     |         |       |       |                |         |                                     |         |
|--------------------------------------|-------|------|----|------|-----|---------|-------|-------|----------------|---------|-------------------------------------|---------|
| builddf4pA/folds/fold-0-0-10:REMARK  | Build | Rank | 10 | Fold | 14  | 712.671 | 29.17 | 24.43 | EegGfFCcbBAaDd | EgfCbAD | +B+0.-A+0.-B-1.+B+1.-a+0.+B+2.+A+1. | 710.475 |
| builddf4pA/folds/fold-0-0-20:REMARK  | Build | Rank | 20 | Fold | 288 | 563.175 | 24.98 | 22.55 | fFBbAaeEGgcCDd | fBAeGcD | +B+0.-A+0.-B+3.+B+1.-a+0.+B+2.-a+1. | 558.715 |
| builddf4pA/folds/fold-0-0-30:REMARK  | Build | Rank | 30 | Fold | 395 | 487.963 | 33.13 | 14.73 | AabBfFCcgGeEDd | AbfCgeD | +B+0.-A+0.-B+3.+B+1.-a+0.-B+2.+a-1. | 483.098 |
| builddf4pA/folds/fold-0-10-10:REMARK | Build | Rank | 10 | Fold | 32  | 600.118 | 26.41 | 22.73 | CcgGfFddeEAaBb | CgFDeAB | +B+0.-A+0.+B-2.+B-1.-a+0.+B+1.+a+1. | 597.065 |
| builddf4pA/folds/fold-0-10-20:REMARK | Build | Rank | 20 | Fold | 161 | 493.677 | 22.52 | 21.92 | aABbcCDdgGfFe  | aBcDgFE | +B+0.-A+0.+B-1.-B-2.+a+0.-B-3.-A-1. | 489.586 |
| builddf4pA/folds/fold-0-10-30:REMARK | Build | Rank | 30 | Fold | 86  | 426.342 | 18.89 | 22.56 | DdbBAaCcgGFfeE | DbaCgFe | +B+0.-A+0.+B-2.+B-1.-a+0.+B+1.-A+1. | 421.166 |
| builddf4pA/folds/fold-0-1-10:REMARK  | Build | Rank | 10 | Fold | 14  | 712.671 | 29.17 | 24.43 | EegGfFCcbBAaDd | EgfCbAD | +B+0.-A+0.-B-1.+B+1.-a+0.+B+2.+A+1. | 710.16  |
| builddf4pA/folds/fold-0-11-10:REMARK | Build | Rank | 10 | Fold | 32  | 600.118 | 26.41 | 22.73 | CcgGfFddeEAaBb | CgFDeAB | +B+0.-A+0.+B-2.+B-1.-a+0.+B+1.+a+1. | 596.998 |
| builddf4pA/folds/fold-0-11-30:REMARK | Build | Rank | 30 | Fold | 86  | 426.342 | 18.89 | 22.56 | DdbBAaCcgGFfeE | DbaCgFe | +B+0.-A+0.+B-2.+B-1.-a+0.+B+1.-A+1. | 421.295 |
| builddf4pA/folds/fold-0-11-40:REMARK | Build | Rank | 40 | Fold | 46  | 389.974 | 30.82 | 12.65 | cCBaAdDGgFfeE  | cBAdGfE | +B+0.-A+0.-B+1.+B-1.-a+0.-B-2.+A-1. | 384.323 |

best.list

|             |       |      |   |      |      |          |       |       |                      |            |                                                    |         |
|-------------|-------|------|---|------|------|----------|-------|-------|----------------------|------------|----------------------------------------------------|---------|
| fold-18-4-1 | Build | Rank | 1 | Fold | 1267 | 1548.307 | 34.86 | 44.42 | GghHIijJEefFCcbBAaDd | GhIjEfCbAd | +B+0.-A+0.+B-1.-a+0.+B+1.-a+1.+B+2.-a+2.+B+3.-A+1. | 6617.08 |
| fold-18-5-1 | Build | Rank | 1 | Fold | 1267 | 1548.307 | 34.86 | 44.42 | GghHIijJEefFCcbBAaDd | GhIjEfCbAd | +B+0.-A+0.+B-1.-a+0.+B+1.-a+1.+B+2.-a+2.+B+3.-A+1. | 5673.46 |
| fold-18-5-2 | Build | Rank | 2 | Fold | 728  | 1548.043 | 34.85 | 44.42 | cDdaABbeEFfgGjjiIhh  | cDaBeFgJiH | +B+0.-A+0.+B-1.-a+0.+B+1.-a+1.+B+2.-a+2.+B+3.-A+1. | 5782.47 |
| fold-18-4-2 | Build | Rank | 2 | Fold | 728  | 1548.043 | 34.85 | 44.42 | cDdaABbeEFfgGjjiIhh  | cDaBeFgJiH | +B+0.-A+0.+B-1.-a+0.+B+1.-a+1.+B+2.-a+2.+B+3.-A+1. | 6634.26 |
| fold-31-2-1 | Build | Rank | 1 | Fold | 3    | 1534.279 | 47.93 | 32.01 | AadDccfFEeBb         | AdCFEB     | +B+0.-A+0.+B-1.-A-1.+B-2.+a+0.                     | 5613.95 |
| fold-18-0-1 | Build | Rank | 1 | Fold | 918  | 1505.223 | 36.04 | 41.77 | CcdDAabBEefGgJjIihH  | CdAbEFGjIh | +B+0.-A+0.+B-1.-a+0.+B+1.-a+1.+B+2.-a+2.+B+3.-A+1. | 5442.44 |
| fold-18-1-1 | Build | Rank | 1 | Fold | 918  | 1505.223 | 36.04 | 41.77 | CcdDAabBEefGgJjIihH  | CdAbEFGjIh | +B+0.-A+0.+B-1.-a+0.+B+1.-a+1.+B+2.-a+2.+B+3.-A+1. | 6637.49 |
| fold-17-4-1 | Build | Rank | 1 | Fold | 2168 | 1436.239 | 35.61 | 40.34 | cDDaABbeEFfgGjjiIhh  | cDaBeFgJiH | +B+0.-A+0.+B-1.-a+0.+B+1.-a+1.+B+2.-a+2.+B+3.-A+1. | 5062.74 |
| fold-17-5-1 | Build | Rank | 1 | Fold | 2168 | 1436.239 | 35.61 | 40.34 | cDDaABbeEFfgGjjiIhh  | cDaBeFgJiH | +B+0.-A+0.+B-1.-a+0.+B+1.-a+1.+B+2.-a+2.+B+3.-A+1. | 8742.33 |
| fold-18-3-1 | Build | Rank | 1 | Fold | 5    | 1433.421 | 35.53 | 40.35 | CcbBAadDEhHGgfFiIJ   | CbAdEHGfiJ | +B+0.-A+0.+B-1.-a+0.+B+1.-a+1.+B+2.-A+1.-B+3.+a+2. | 4040.74 |

reranked best.list

|             |       |      |   |      |      |          |       |       |                      |            |                                                    |         |
|-------------|-------|------|---|------|------|----------|-------|-------|----------------------|------------|----------------------------------------------------|---------|
| fold-18-5-4 | Build | Rank | 4 | Fold | 729  | 1410.655 | 31.76 | 44.42 | cDdaABbeEFfgGjjiIhh  | cDaBeFgJiH | +B+0.-A+0.+B-1.-a+0.+B+1.-a+1.+B+2.-a+2.+B+3.+A+1. | 7690.11 |
| fold-18-5-3 | Build | Rank | 3 | Fold | 1268 | 1410.884 | 31.76 | 44.42 | GghHIijJEefFCcbBAaDd | GhIjEfCbAD | +B+0.-A+0.+B-1.-a+0.+B+1.-a+1.+B+2.-a+2.+B+3.+A+1. | 7416.02 |
| fold-18-5-2 | Build | Rank | 2 | Fold | 728  | 1548.043 | 34.85 | 44.42 | cDdaABbeEFfgGjjiIhh  | cDaBeFgJiH | +B+0.-A+0.+B-1.-a+0.+B+1.-a+1.+B+2.-a+2.+B+3.-A+1. | 5782.47 |
| fold-18-5-1 | Build | Rank | 1 | Fold | 1267 | 1548.307 | 34.86 | 44.42 | GghHIijJEefFCcbBAaDd | GhIjEfCbAD | +B+0.-A+0.+B-1.-a+0.+B+1.-a+1.+B+2.-a+2.+B+3.-A+1. | 5673.46 |
| fold-18-4-4 | Build | Rank | 4 | Fold | 729  | 1410.655 | 31.76 | 44.42 | cDdaABbeEFfgGjjiIhh  | cDaBeFgJiH | +B+0.-A+0.+B-1.-a+0.+B+1.-a+1.+B+2.-a+2.+B+3.+A+1. | 7590.84 |
| fold-18-4-3 | Build | Rank | 3 | Fold | 1268 | 1410.884 | 31.76 | 44.42 | GghHIijJEefFCcbBAaDd | GhIjEfCbAD | +B+0.-A+0.+B-1.-a+0.+B+1.-a+1.+B+2.-a+2.+B+3.+A+1. | 8050.22 |
| fold-18-4-2 | Build | Rank | 2 | Fold | 728  | 1548.043 | 34.85 | 44.42 | cDdaABbeEFfgGjjiIhh  | cDaBeFgJiH | +B+0.-A+0.+B-1.-a+0.+B+1.-a+1.+B+2.-a+2.+B+3.-A+1. | 6634.26 |
| fold-18-4-1 | Build | Rank | 1 | Fold | 1267 | 1548.307 | 34.86 | 44.42 | GghHIijJEefFCcbBAaDd | GhIjEfCbAd | +B+0.-A+0.+B-1.-a+0.+B+1.-a+1.+B+2.-a+2.+B+3.-A+1. | 6617.08 |
| fold-18-5-5 | Build | Rank | 5 | Fold | 725  | 1399.178 | 33.07 | 42.31 | cDdaABbeEFfgGhHIijJ  | cDaBeFgHIj | +B+0.-A+0.+B-1.-a+0.+B+1.-a+1.+B+2.-A+1.-B+3.+a+2. | 3951.84 |
| fold-18-4-5 | Build | Rank | 5 | Fold | 725  | 1399.178 | 33.07 | 42.31 | cDdaABbeEFfgGhHIijJ  | cDaBeFgHIj | +B+0.-A+0.+B-1.-a+0.+B+1.-a+1.+B+2.-A+1.-B+3.+a+2. | 3272.52 |

5p21A (166) +B+0.-A+0.-B-2.+B-1.-a+0.+B+1.-a+1.+B+2.-a+2.+B+3.-A+1.

**The Ras p21 G-protein** which, although Rossmann-like, has a unusual embellishment of the edge of the domain comprising a parallel  $\alpha\beta$  connection leading into a long  $\beta$ -hairpin.

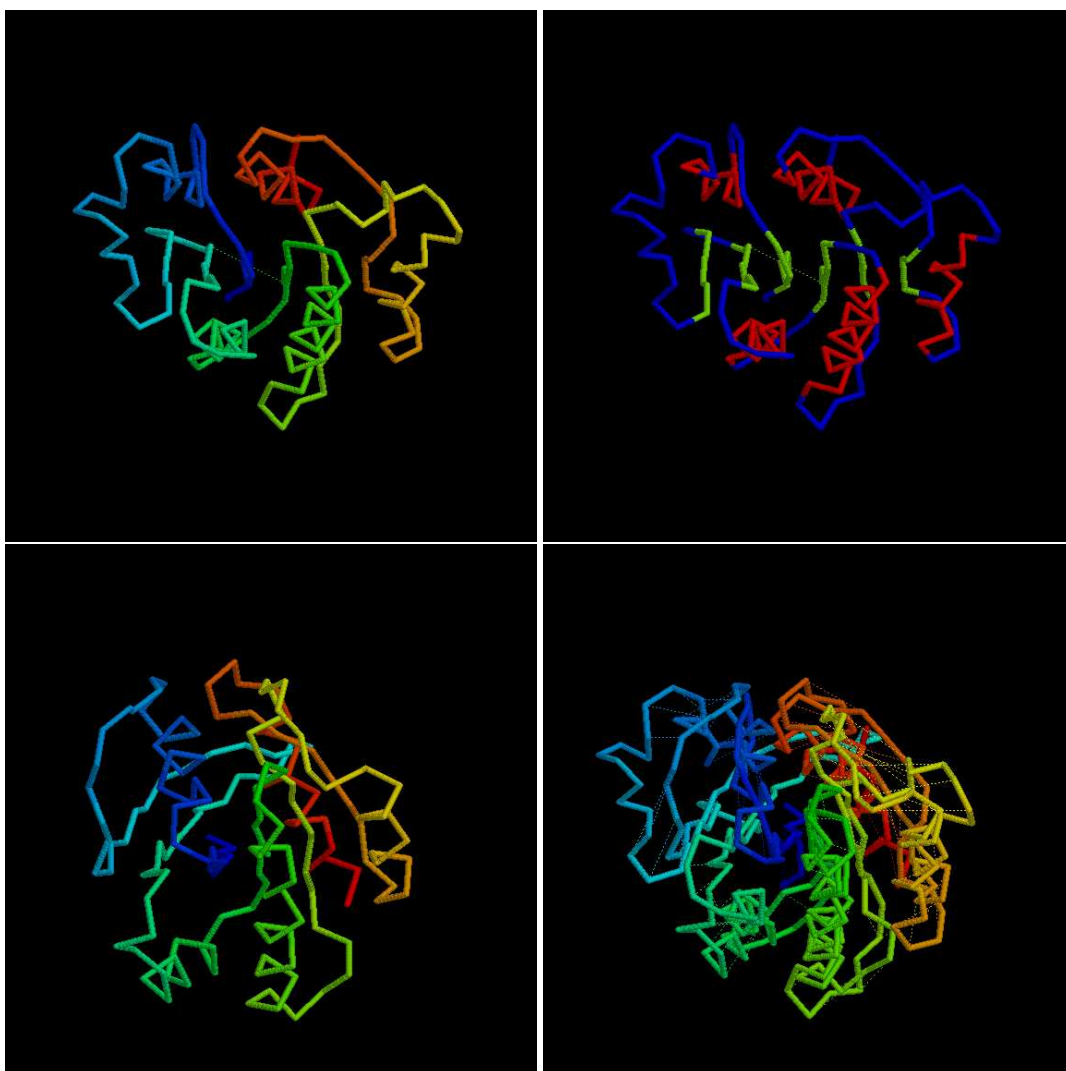



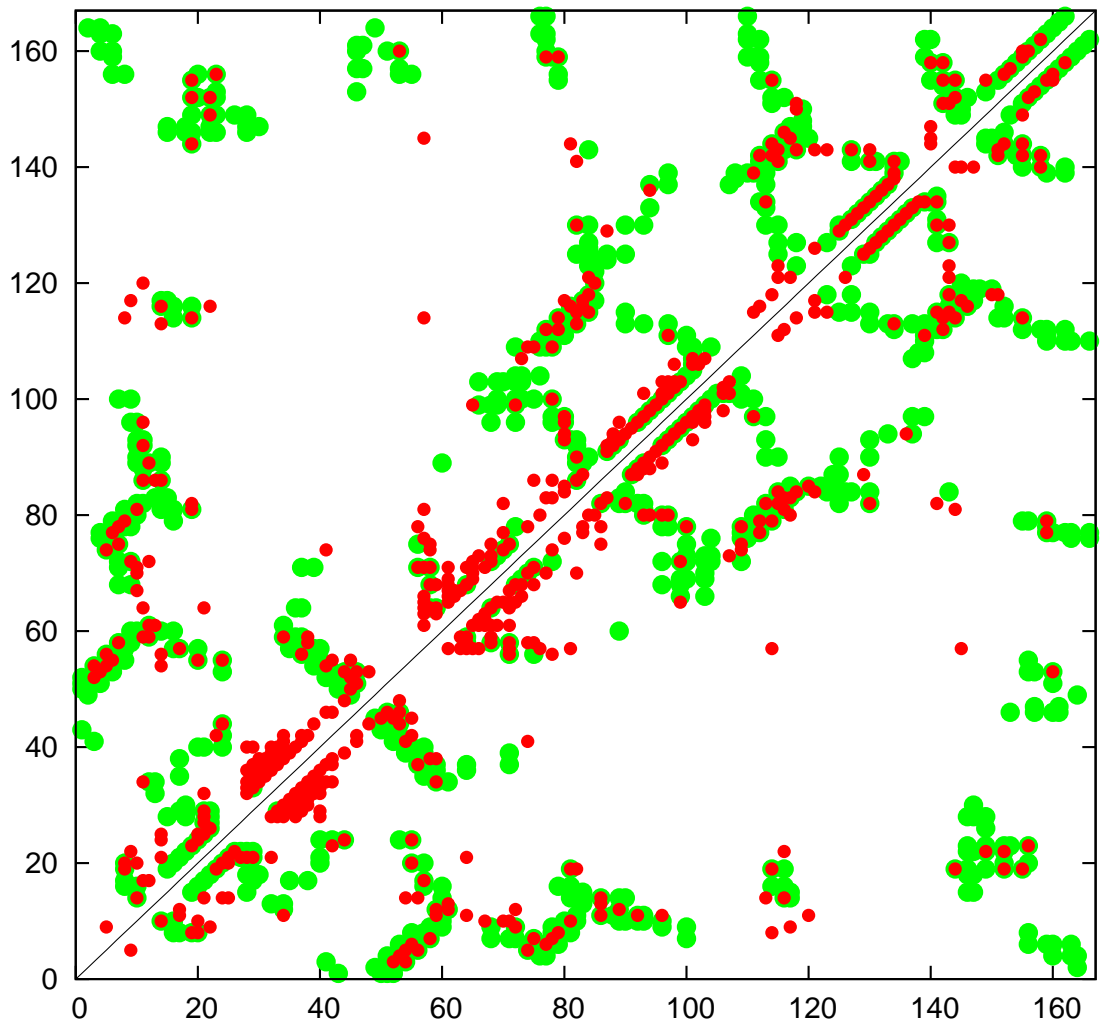

full.list

| Build                                | Rank  | Fold | 1654 | 1155.908 | 27.48 | 42.06    | GgiIjJKkhHEefFCcDdaAbB | GijKhEfcDab | +B+0.-B-1.-B-2.+A+0.-A+1.+B+1.-a+0.+B+2.+A+2.-B+3.-a+1. | 1152.89     |                                                         |         |
|--------------------------------------|-------|------|------|----------|-------|----------|------------------------|-------------|---------------------------------------------------------|-------------|---------------------------------------------------------|---------|
| build5p21A/folds/fold-0-0-10:REMARK  | Build | Rank | 10   | Fold     | 1451  | 986.253  | 27.59                  | 35.75       | GgeEAadDdhHiikKJjFfCcBb                                 | GeADhIkJfCb | +B+0.-B+1.+B+3.+A+0.-A-1.+B-1.-A-2.+B-2.-a+0.+B+2.-a+1. | 982.181 |
| build5p21A/folds/fold-0-0-30:REMARK  | Build | Rank | 30   | Fold     | 74    | 920.888  | 26.32                  | 34.99       | EegGjJfFbBAadCchHIiKk                                   | EgJfBAdChIk | +B+0.-B+1.+B+3.+A+0.-A-1.+B-2.-a+0.+B-1.-a+1.+B+2.-a+2. | 915.411 |
| build5p21A/folds/fold-0-10-10:REMARK | Build | Rank | 10   | Fold     | 78    | 841.459  | 25.56                  | 32.92       | EeaAcDdGgGHhkKjJiIfffbB                                 | EacDgHkjiFb | +B+0.-B+2.-B+1.+A+0.-A-1.+B-2.-A-2.+B-3.-a+0.+B-1.-a+1. | 839.062 |
| build5p21A/folds/fold-0-10-50:REMARK | Build | Rank | 50   | Fold     | 482   | 610.515  | 18.57                  | 32.88       | cCaAEedDgGjJiIHhkKfFbB                                  | caEdGUhKfB  | +B+0.+B-1.-B+1.+A+0.-A-1.+B-4.+a+0.-B+3.+A+2.+B+2.-a-1. | 603.613 |
| build5p21A/folds/fold-0-1-10:REMARK  | Build | Rank | 10   | Fold     | 1654  | 1155.908 | 27.48                  | 42.06       | GgiIjJKkhHEefFCcDdaAbB                                  | GijKhEfcDab | +B+0.-B-1.-B-2.+A+0.-A+1.+B+1.-a+0.+B+2.+A+2.-B+3.-a+1. | 1152.91 |
| build5p21A/folds/fold-0-11-10:REMARK | Build | Rank | 10   | Fold     | 78    | 841.459  | 25.56                  | 32.92       | EeaAcDdGgGHhkKjJiIfffbB                                 | EacDgHkjiFb | +B+0.-B+2.-B+1.+A+0.-A-1.+B-2.-A-2.+B-3.-a+0.+B-1.-a+1. | 839.089 |
| build5p21A/folds/fold-0-1-20:REMARK  | Build | Rank | 20   | Fold     | 1451  | 986.253  | 27.59                  | 35.75       | GgeEAadDdhHiikKJjFfCcBb                                 | GeADhIkJfCb | +B+0.-B+1.+B+3.+A+0.-A-1.+B-1.-A-2.+B-2.-a+0.+B+2.-a+1. | 981.822 |
| build5p21A/folds/fold-0-1-30:REMARK  | Build | Rank | 30   | Fold     | 74    | 920.888  | 26.32                  | 34.99       | EegGjJfFbBAadCchHIiKk                                   | EgJfBAdChIk | +B+0.-B+1.+B+3.+A+0.-A-1.+B-2.-a+0.+B-1.-a+1.+B+2.-a+2. | 915.553 |
| build5p21A/folds/fold-0-16-10:REMARK | Build | Rank | 10   | Fold     | 697   | 1024.487 | 30.85                  | 33.21       | DdbBAaCcgGHheEFfKkji                                    | DbaCgHeFkji | +B+0.-B+1.+B+2.+A+0.-A-1.+B-2.-a+0.+B-1.-A-2.+B-3.+a-1. | 1022.28 |

best.list

|             |       |      |   |      |     |          |       |       |                        |              |                                                         |         |
|-------------|-------|------|---|------|-----|----------|-------|-------|------------------------|--------------|---------------------------------------------------------|---------|
| fold-7-21-1 | Build | Rank | 1 | Fold | 458 | 2263.359 | 36.63 | 61.80 | dDcCAabBEefFIihHkKjJgG | dcAbEfiHkKjG | +B+0.+A+0.-B-2.+B-1.-a+0.+B+1.-a+1.+B+2.-a+2.+B+3.-A+1. | 12685.7 |
| fold-7-20-1 | Build | Rank | 1 | Fold | 458 | 2263.359 | 36.63 | 61.80 | dDcCAabBEefFIihHkKjJgG | dcAbEfiHkKjG | +B+0.+A+0.-B-2.+B-1.-a+0.+B+1.-a+1.+B+2.-a+2.+B+3.-A+1. | 11983.8 |
| fold-6-20-1 | Build | Rank | 1 | Fold | 383 | 2263.174 | 37.32 | 60.64 | dDcCAabBEefFIihHkKjJgG | dcAbEfiHkKjG | +B+0.+A+0.-B-2.+B-1.-a+0.+B+1.-a+1.+B+2.-a+2.+B+3.-A+1. | 12968.8 |
| fold-6-21-1 | Build | Rank | 1 | Fold | 383 | 2263.174 | 37.32 | 60.64 | dDcCAabBEefFIihHkKjJgG | dcAbEfiHkKjG | +B+0.+A+0.-B-2.+B-1.-a+0.+B+1.-a+1.+B+2.-a+2.+B+3.-A+1. | 14091.6 |
| fold-0-21-1 | Build | Rank | 1 | Fold | 27  | 2082.695 | 38.44 | 54.19 | dDBbAacCGgfEehHiiJkKk  | dBAcGFehIkJk | +B+0.-B-1.-B-2.+A+0.-A+1.+B+1.-a+0.+B+2.-a+1.+B+3.-a+2. | 4054.46 |
| fold-6-4-1  | Build | Rank | 1 | Fold | 120 | 2073.412 | 33.83 | 61.29 | dDeEAabBCcfFGghHkKjJiI | deAbCfGhKjI  | +B+0.+A+0.-B-2.+B-1.-a+0.+B+1.-a+1.+B+2.-a+2.+B+3.-A+1. | 11628   |
| fold-6-5-1  | Build | Rank | 1 | Fold | 120 | 2073.412 | 33.83 | 61.29 | dDeEAabBCcfFGghHkKjJiI | deAbCfGhKjI  | +B+0.+A+0.-B-2.+B-1.-a+0.+B+1.-a+1.+B+2.-a+2.+B+3.-A+1. | 11140.5 |
| fold-7-21-2 | Build | Rank | 2 | Fold | 457 | 2060.518 | 33.57 | 61.38 | dDcCAabBEefFIihHkKjJgG | dcAbEfiHkKjG | +B+0.+A+0.-B-2.+B-1.-a+0.+B+1.-a+1.+B+2.-a+2.+B+3.+A+1. | 6825.96 |
| fold-7-20-2 | Build | Rank | 2 | Fold | 457 | 2060.518 | 33.57 | 61.38 | dDcCAabBEefFIihHkKjJgG | dcAbEfiHkKjG | +B+0.+A+0.-B-2.+B-1.-a+0.+B+1.-a+1.+B+2.-a+2.+B+3.+A+1. | 7224.33 |
| fold-6-20-2 | Build | Rank | 2 | Fold | 382 | 2058.172 | 34.18 | 60.22 | dDcCAabBEefFIihHkKjJgG | dcAbEfiHkKjG | +B+0.+A+0.-B-2.+B-1.-a+0.+B+1.-a+1.+B+2.-a+2.+B+3.+A+1. | 9163.06 |

reranked best.list

|             |       |      |   |      |     |          |       |       |                        |              |                                                         |         |
|-------------|-------|------|---|------|-----|----------|-------|-------|------------------------|--------------|---------------------------------------------------------|---------|
| fold-7-21-1 | Build | Rank | 1 | Fold | 458 | 2263.359 | 36.63 | 61.80 | dDcCAabBEefFIihHkKjJgG | dcAbEfiHkKjG | +B+0.+A+0.-B-2.+B-1.-a+0.+B+1.-a+1.+B+2.-a+2.+B+3.-A+1. | 12685.7 |
| fold-7-20-1 | Build | Rank | 1 | Fold | 458 | 2263.359 | 36.63 | 61.80 | dDcCAabBEefFIihHkKjJgG | dcAbEfiHkKjG | +B+0.+A+0.-B-2.+B-1.-a+0.+B+1.-a+1.+B+2.-a+2.+B+3.-A+1. | 11983.8 |
| fold-7-5-1  | Build | Rank | 1 | Fold | 120 | 2042.016 | 33.26 | 61.40 | dDeEAabBCcfFGghHkKjJiI | deAbCfGhKjI  | +B+0.+A+0.-B-2.+B-1.-a+0.+B+1.-a+1.+B+2.-a+2.+B+3.-A+1. | 8534.68 |
| fold-7-4-1  | Build | Rank | 1 | Fold | 120 | 2042.016 | 33.26 | 61.40 | dDeEAabBCcfFGghHkKjJiI | deAbCfGhKjI  | +B+0.+A+0.-B-2.+B-1.-a+0.+B+1.-a+1.+B+2.-a+2.+B+3.-A+1. | 8963.33 |
| fold-7-21-2 | Build | Rank | 2 | Fold | 457 | 2060.518 | 33.57 | 61.38 | dDcCAabBEefFIihHkKjJgG | dcAbEfiHkKjG | +B+0.+A+0.-B-2.+B-1.-a+0.+B+1.-a+1.+B+2.-a+2.+B+3.+A+1. | 6825.96 |
| fold-7-20-2 | Build | Rank | 2 | Fold | 457 | 2060.518 | 33.57 | 61.38 | dDcCAabBEefFIihHkKjJgG | dcAbEfiHkKjG | +B+0.+A+0.-B-2.+B-1.-a+0.+B+1.-a+1.+B+2.-a+2.+B+3.+A+1. | 7224.33 |
| fold-6-5-1  | Build | Rank | 1 | Fold | 120 | 2073.412 | 33.83 | 61.29 | dDeEAabBCcfFGghHkKjJiI | deAbCfGhKjI  | +B+0.+A+0.-B-2.+B-1.-a+0.+B+1.-a+1.+B+2.-a+2.+B+3.-A+1. | 11140.5 |
| fold-6-4-1  | Build | Rank | 1 | Fold | 120 | 2073.412 | 33.83 | 61.29 | dDeEAabBCcfFGghHkKjJiI | deAbCfGhKjI  | +B+0.+A+0.-B-2.+B-1.-a+0.+B+1.-a+1.+B+2.-a+2.+B+3.-A+1. | 11628   |
| fold-8-21-1 | Build | Rank | 1 | Fold | 383 | 1965.641 | 32.19 | 61.06 | dDcCAabBEefFIihHkKjJgG | dcAbEfiHkKjG | +B+0.+A+0.-B-2.+B-1.-a+0.+B+1.-a+1.+B+2.-a+2.+B+3.-A+1. | 8938.13 |
| fold-8-20-1 | Build | Rank | 1 | Fold | 383 | 1965.641 | 32.19 | 61.06 | dDcCAabBEefFIihHkKjJgG | dcAbEfiHkKjG | +B+0.+A+0.-B-2.+B-1.-a+0.+B+1.-a+1.+B+2.-a+2.+B+3.-A+1. | 9524.64 |



## 1.2 Target test set

2r4qA (102) = +B+0.-A+0.+B-1.-a+0.+B+1.+B+2.-A+1

**A domain of fruA from Bacillus subtilis.** The top scoring folds under all ranking schemes had the correct  $\beta$ -sheet topology for this protein but under the combined packing/contact score, the terminal helix was flipped. Re-ranking the best list by just the contact score brought the correct fold at the top.

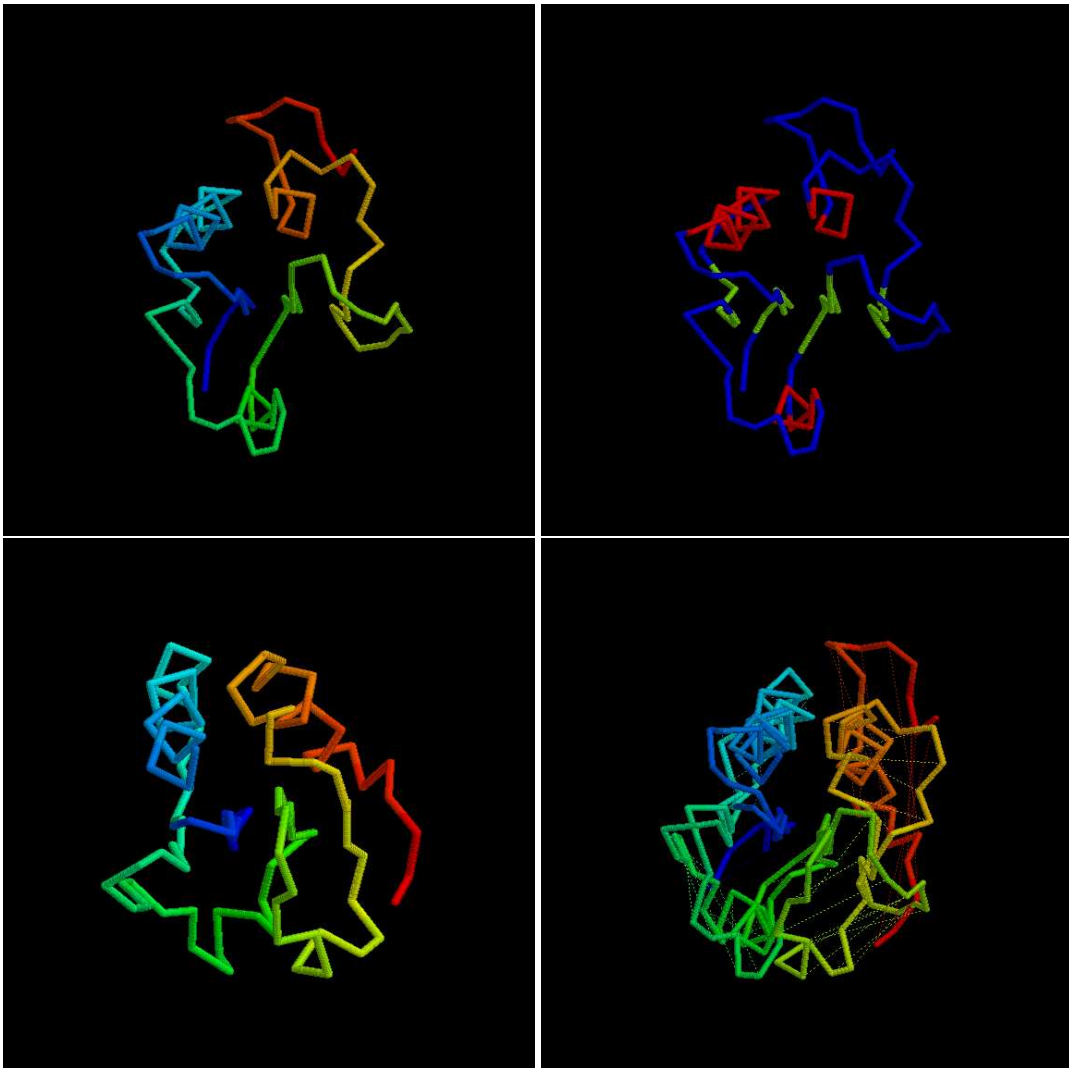

KVVGVTSCIAGHTPMAAKALEKAGVRLGHVDVKEIQQGAMGTIDEITPAEVSAAADVVI I AADKVI GEEERFKGKPVVVRVKI GOCVANGAEAVLSKVV  
KI VAI TSCIAGHTPMAAKALEQAASRMGHEIKVEQQGAMGRVNTITKEEAQDADFI LI ASDQTI GMEERFDGKKVI KVKI GI ALKKPEAVLTKCI E  
I VCVAACTAGHTYI AREKLI KGAKALGHTI KVETQGTI GTENELQAADI SAADVVI LAVDVKI GEEERFTNKRI VRVKTEI VI KS PVQPLEKV  
KI VGVAACVGHGTYI AQEKLENASKAAGHDVKI ETQGTI GI ENQLTSEBI AAADI VLLAVDVKI GEEERFEGKKVVKVPTVEVAI KSPNKLI AKLVE  
I I GI AACTSGHTYI AREKLTAGTALGHNVHIE TQGTI GI EDELSAEQVKNADVVI I AADI KI GKDRFKGKRVVEI PTDLAI KAPKQI I NKI DKE  
KI I AVTACPSGHTYMAAEALLESAAKAKGWDVKVETQSGI GLENELTAEDVASADMVILTCKDI GI FEEERFAGKTI VRVNI SDAVKKRADAI MNKI  
KVVAI TACP TGHTYMAAEKLES TGRRLGHVDVKVETQGA I GI ENELSSRDI QAADVLLAVDI AI GEEERFEDKRVVVRVPI QNVLKDANAVFA  
KL VAVTACVSGHTYMAAERLDKLCLOLKWQVKVETQGA LGVEYSLTEDDI LQADAVI LI NDVAI EQEERFQNCRCVQADI QTFI CHPEKIL A  
L VAVTACVSGHTYMAAERLEKLCQOEKWSI KI ETQGA LGTENRNLTEEDI RRADVLLI TDI ELGVERFTRSRVYVQSGI SAFLREPQVMS  
KI VAVTACP TGHTYMAADVKKAAAKLGVSI KVETQGA MGVENVLTTPVDI VSADLVI I ASDI EI DKNRFLGI NSKQFP I ETI LTDVEGI LKKHL  
RI VAVTACP TGHTYMAADALNKTAPKFNVS I KVETQGA MG ENLTAQDI TLADKVI I VSDI DI QPSRFDPAKTVFI PMEEVLLS VDKVFI KH  
KI VAVTACP TGHTYMAADALMKAAPKHNVOI KVETQGA MG ENLTPHDI AQADRVLI VSDI EI QPGRFEGTRQIQI PI BEVLLNVDKVF  
KI I AVTACATGHTYMAAALKKAS KKMGLI KVETQGA TGI DNELTTKDAQI AEVVI FAVDTKVNAEERFEGKEI LEVVPVNAPI KDAEKVI NDAL  
KI I AVTACATGHTYMAAALKKGAKKMGNLI KVETQGA TGI ENELTEKDVNI GEVVI FAVDTKVNKERFDGKVVLEVPVSAPI KDAEKVI NAAL  
AKI LAVTACP TGHTYMAADALKEKAKELGVEI KVETNGSSGI KHKLTAOEI EDAPAI I VAADKQVEMERFKGKRVLVQVPTAGI RRPQOELEKAMNQDAP I Y

KVVGVTSCIAGHTPMAAKALEKAGVRLGHVDVKEIQQGAMGTIDEITPAEVSAAADVVI I AADKVI GEEERFKGKPVVVRVKI GOCVANGAEAVLSKVV  
KI VAI TSCIAGHTPMAAKALEQAASRMGHEIKVEQQGAMGRVNTITKEEAQDADFI LI ASDQTI GMEERFDGKKVI KVKI GI ALKKPEAVLTKCI E  
I VCVAACTAGHTYI AREKLI KGAKALGHTI KVETQGTI GTENELQAADI SAADVVI LAVDVKI GEEERFTNKRI VRVKTEI VI KS PVQPLEKV  
KI VGVAACVGHGTYI AQEKLENASKAAGHDVKI ETQGTI GI ENQLTSEBI AAADI VLLAVDVKI GEEERFEGKKVVKVPTVEVAI KSPNKLI AKLVE  
I I GI AACTSGHTYI AREKLTAGTALGHNVHIE TQGTI GI EDELSAEQVKNADVVI I AADI KI GKDRFKGKRVVEI PTDLAI KAPKQI I NKI DKE  
KI I AVTACPSGHTYMAAEALLESAAKAKGWDVKVETQSGI GLENELTAEDVASADMVILTCKDI GI FEEERFAGKTI VRVNI SDAVKKRADAI MNKI  
KVVAI TACP TGHTYMAAEKLES TGRRLGHVDVKVETQGA I GI ENELSSRDI QAADVLLAVDI AI GEEERFEDKRVVVRVPI QNVLKDANAVFA  
KL VAVTACVSGHTYMAAERLDKLCLOLKWQVKVETQGA LGVEYSLTEDDI LQADAVI LI NDVAI EQEERFQNCRCVQADI QTFI CHPEKIL A  
L VAVTACVSGHTYMAAERLEKLCQOEKWSI KI ETQGA LGTENRNLTEEDI RRADVLLI TDI ELGVERFTRSRVYVQSGI SAFLREPQVMS  
KI VAVTACP TGHTYMAADVKKAAAKLGVSI KVETQGA MGVENVLTTPVDI VSADLVI I ASDI EI DKNRFLGI NSKQFP I ETI LTDVEGI LKKHL  
RI VAVTACP TGHTYMAADALNKTAPKFNVS I KVETQGA MG ENLTAQDI TLADKVI I VSDI DI QPSRFDPAKTVFI PMEEVLLS VDKVFI KH  
KI VAVTACP TGHTYMAADALMKAAPKHNVOI KVETQGA MG ENLTPHDI AQADRVLI VSDI EI QPGRFEGTRQIQI PI BEVLLNVDKVF  
KI I AVTACATGHTYMAAALKKAS KKMGLI KVETQGA TGI DNELTTKDAQI AEVVI FAVDTKVNAEERFEGKEI LEVVPVNAPI KDAEKVI NDAL  
KI I AVTACATGHTYMAAALKKGAKKMGNLI KVETQGA TGI ENELTEKDVNI GEVVI FAVDTKVNKERFDGKVVLEVPVSAPI KDAEKVI NAAL  
AKI LAVTACP TGHTYMAADALKEKAKELGVEI KVETNGSSGI KHKLTAOEI EDAPAI I VAADKQVEMERFKGKRVLVQVPTAGI RRPQOELEKAMNQDAP I Y

KVVGVTSCIAGHTPMAAKALEKAGVRLGHVDVKEIQQGAMGTIDEITPAEVSAAADVVI I AADKVI GEEERFKGKPVVVRVKI GOCVANGAEAVLSKVV  
KI VAI TSCIAGHTPMAAKALEQAASRMGHEIKVEQQGAMGRVNTITKEEAQDADFI LI ASDQTI GMEERFDGKKVI KVKI GI ALKKPEAVLTKCI E  
I VCVAACTAGHTYI AREKLI KGAKALGHTI KVETQGTI GTENELQAADI SAADVVI LAVDVKI GEEERFTNKRI VRVKTEI VI KS PVQPLEKV  
KI VGVAACVGHGTYI AQEKLENASKAAGHDVKI ETQGTI GI ENQLTSEBI AAADI VLLAVDVKI GEEERFEGKKVVKVPTVEVAI KSPNKLI AKLVE  
I I GI AACTSGHTYI AREKLTAGTALGHNVHIE TQGTI GI EDELSAEQVKNADVVI I AADI KI GKDRFKGKRVVEI PTDLAI KAPKQI I NKI DKE  
KI I AVTACPSGHTYMAAEALLESAAKAKGWDVKVETQSGI GLENELTAEDVASADMVILTCKDI GI FEEERFAGKTI VRVNI SDAVKKRADAI MNKI  
KVVAI TACP TGHTYMAAEKLES TGRRLGHVDVKVETQGA I GI ENELSSRDI QAADVLLAVDI AI GEEERFEDKRVVVRVPI QNVLKDANAVFA  
KL VAVTACVSGHTYMAAERLDKLCLOLKWQVKVETQGA LGVEYSLTEDDI LQADAVI LI NDVAI EQEERFQNCRCVQADI QTFI CHPEKIL A  
L VAVTACVSGHTYMAAERLEKLCQOEKWSI KI ETQGA LGTENRNLTEEDI RRADVLLI TDI ELGVERFTRSRVYVQSGI SAFLREPQVMS  
KI VAVTACP TGHTYMAADVKKAAAKLGVSI KVETQGA MGVENVLTTPVDI VSADLVI I ASDI EI DKNRFLGI NSKQFP I ETI LTDVEGI LKKHL  
RI VAVTACP TGHTYMAADALNKTAPKFNVS I KVETQGA MG ENLTAQDI TLADKVI I VSDI DI QPSRFDPAKTVFI PMEEVLLS VDKVFI KH  
KI VAVTACP TGHTYMAADALMKAAPKHNVOI KVETQGA MG ENLTPHDI AQADRVLI VSDI EI QPGRFEGTRQIQI PI BEVLLNVDKVF  
KI I AVTACATGHTYMAAALKKAS KKMGLI KVETQGA TGI DNELTTKDAQI AEVVI FAVDTKVNAEERFEGKEI LEVVPVNAPI KDAEKVI NDAL  
KI I AVTACATGHTYMAAALKKGAKKMGNLI KVETQGA TGI ENELTEKDVNI GEVVI FAVDTKVNKERFDGKVVLEVPVSAPI KDAEKVI NAAL  
AKI LAVTACP TGHTYMAADALKEKAKELGVEI KVETNGSSGI KHKLTAOEI EDAPAI I VAADKQVEMERFKGKRVLVQVPTAGI RRPQOELEKAMNQDAP I Y

KVVGVTSCIAGHTPMAAKALEKAGVRLGHVDVKEIQQGAMGTIDEITPAEVSAAADVVI I AADKVI GEEERFKGKPVVVRVKI GOCVANGAEAVLSKVV  
KI VAI TSCIAGHTPMAAKALEQAASRMGHEIKVEQQGAMGRVNTITKEEAQDADFI LI ASDQTI GMEERFDGKKVI KVKI GI ALKKPEAVLTKCI E  
I VCVAACTAGHTYI AREKLI KGAKALGHTI KVETQGTI GTENELQAADI SAADVVI LAVDVKI GEEERFTNKRI VRVKTEI VI KS PVQPLEKV  
KI VGVAACVGHGTYI AQEKLENASKAAGHDVKI ETQGTI GI ENQLTSEBI AAADI VLLAVDVKI GEEERFEGKKVVKVPTVEVAI KSPNKLI AKLVE  
I I GI AACTSGHTYI AREKLTAGTALGHNVHIE TQGTI GI EDELSAEQVKNADVVI I AADI KI GKDRFKGKRVVEI PTDLAI KAPKQI I NKI DKE  
KI I AVTACPSGHTYMAAEALLESAAKAKGWDVKVETQSGI GLENELTAEDVASADMVILTCKDI GI FEEERFAGKTI VRVNI SDAVKKRADAI MNKI  
KVVAI TACP TGHTYMAAEKLES TGRRLGHVDVKVETQGA I GI ENELSSRDI QAADVLLAVDI AI GEEERFEDKRVVVRVPI QNVLKDANAVFA  
KL VAVTACVSGHTYMAAERLDKLCLOLKWQVKVETQGA LGVEYSLTEDDI LQADAVI LI NDVAI EQEERFQNCRCVQADI QTFI CHPEKIL A  
L VAVTACVSGHTYMAAERLEKLCQOEKWSI KI ETQGA LGTENRNLTEEDI RRADVLLI TDI ELGVERFTRSRVYVQSGI SAFLREPQVMS  
KI VAVTACP TGHTYMAADVKKAAAKLGVSI KVETQGA MGVENVLTTPVDI VSADLVI I ASDI EI DKNRFLGI NSKQFP I ETI LTDVEGI LKKHL  
RI VAVTACP TGHTYMAADALNKTAPKFNVS I KVETQGA MG ENLTAQDI TLADKVI I VSDI DI QPSRFDPAKTVFI PMEEVLLS VDKVFI KH  
KI VAVTACP TGHTYMAADALMKAAPKHNVOI KVETQGA MG ENLTPHDI AQADRVLI VSDI EI QPGRFEGTRQIQI PI BEVLLNVDKVF  
KI I AVTACATGHTYMAAALKKAS KKMGLI KVETQGA TGI DNELTTKDAQI AEVVI FAVDTKVNAEERFEGKEI LEVVPVNAPI KDAEKVI NDAL  
KI I AVTACATGHTYMAAALKKGAKKMGNLI KVETQGA TGI ENELTEKDVNI GEVVI FAVDTKVNKERFDGKVVLEVPVSAPI KDAEKVI NAAL  
AKI LAVTACP TGHTYMAADALKEKAKELGVEI KVETNGSSGI KHKLTAOEI EDAPAI I VAADKQVEMERFKGKRVLVQVPTAGI RRPQOELEKAMNQDAP I Y

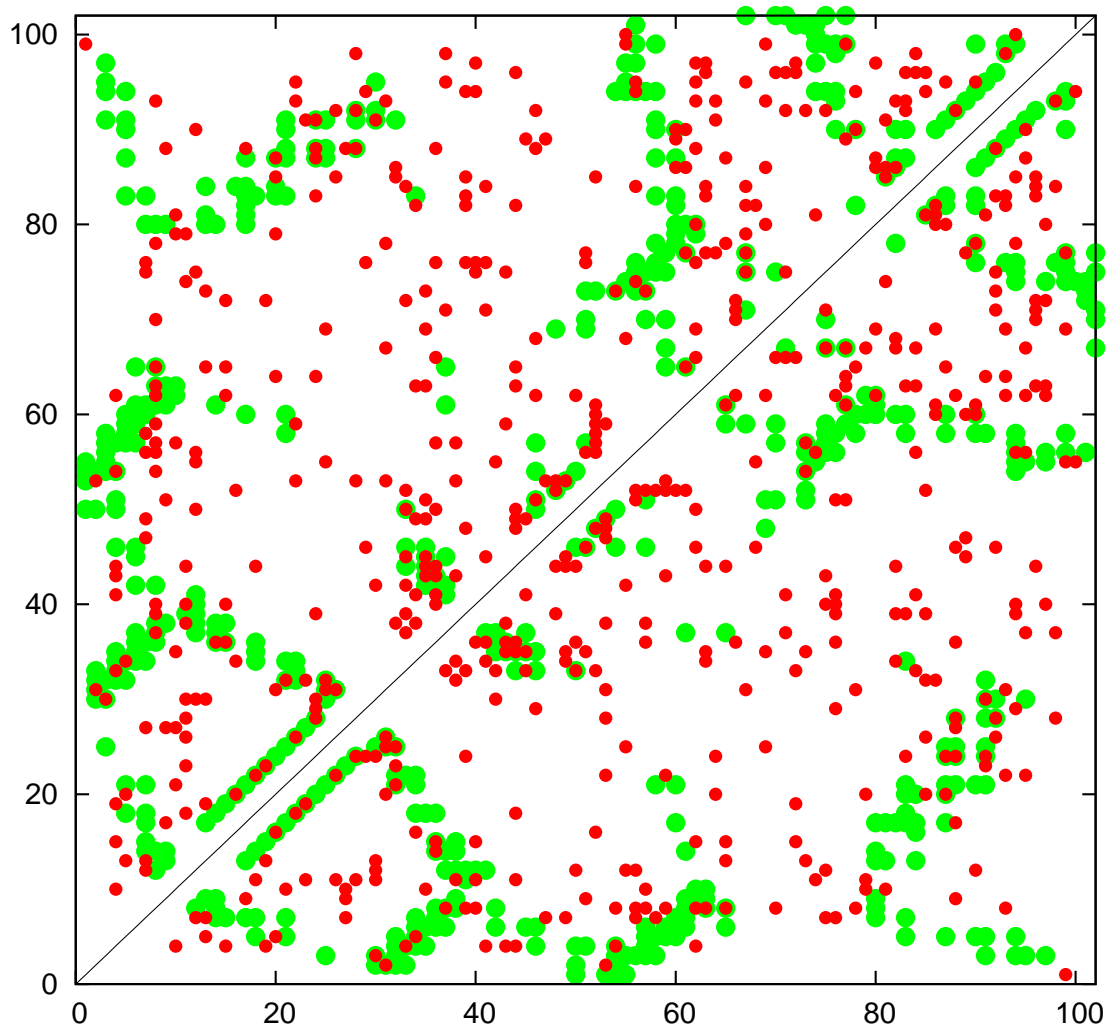

wtaylor@mull1:~/fewpred/pred2r4qA\$ head folds.sort

|                                    |       |      |   |      |     |          |       |       |                |         |                                     |         |
|------------------------------------|-------|------|---|------|-----|----------|-------|-------|----------------|---------|-------------------------------------|---------|
| build2r4qA/folds/fold-4-0-1:REMARK | Build | Rank | 1 | Fold | 181 | 1217.459 | 55.23 | 22.05 | cCDdaABbeEfgG  | cDaBeFg | +B+0.-A+0.+B-1.-a+0.+B+1.-B+2.+A+1. | 1216.68 |
| build2r4qA/folds/fold-4-1-1:REMARK | Build | Rank | 1 | Fold | 181 | 1217.459 | 55.23 | 22.05 | cCDdaABbeEfgG  | cDaBeFg | +B+0.-A+0.+B-1.-a+0.+B+1.-B+2.+A+1. | 1216.57 |
| build2r4qA/folds/fold-3-1-1:REMARK | Build | Rank | 1 | Fold | 181 | 1157.376 | 54.60 | 21.20 | cCDdaABbeEfgG  | cDaBeFg | +B+0.-A+0.+B-1.-a+0.+B+1.-B+2.+A+1. | 1157.3  |
| build2r4qA/folds/fold-3-0-1:REMARK | Build | Rank | 1 | Fold | 181 | 1157.376 | 54.60 | 21.20 | cCDdaABbeEfgG  | cDaBeFg | +B+0.-A+0.+B-1.-a+0.+B+1.-B+2.+A+1. | 1156.42 |
| build2r4qA/folds/fold-2-1-1:REMARK | Build | Rank | 1 | Fold | 114 | 1157.226 | 46.40 | 24.94 | cCDdaABbeEfgG  | cDaBeFg | +B+0.-A+0.+B-1.-a+0.+B+1.-B+2.-A+1. | 1156.28 |
| build2r4qA/folds/fold-2-0-1:REMARK | Build | Rank | 1 | Fold | 114 | 1157.226 | 46.40 | 24.94 | cCDdaABbeEfgG  | cDaBeFg | +B+0.-A+0.+B-1.-a+0.+B+1.-B+2.-A+1. | 1156.27 |
| build2r4qA/folds/fold-3-1-2:REMARK | Build | Rank | 2 | Fold | 183 | 1146.891 | 47.02 | 24.39 | cCDdaABbeEfgG  | cDaBeFg | +B+0.-A+0.+B-1.-a+0.+B+1.-B+2.-A+1. | 1146.2  |
| build2r4qA/folds/fold-3-0-2:REMARK | Build | Rank | 2 | Fold | 183 | 1146.891 | 47.02 | 24.39 | cCDdaABbeEfgG  | cDaBeFg | +B+0.-A+0.+B-1.-a+0.+B+1.-B+2.-A+1. | 1145.83 |
| build2r4qA/folds/fold-9-1-1:REMARK | Build | Rank | 1 | Fold | 183 | 1144.679 | 52.66 | 21.74 | EegGFfbBCcaAdd | EgFbCaD | +B+0.-A+0.+B-1.-a+0.+B+1.-B+2.+A+1. | 1144.55 |
| build2r4qA/folds/fold-9-0-1:REMARK | Build | Rank | 1 | Fold | 183 | 1144.679 | 52.66 | 21.74 | EegGFfbBCcaAdd | EgFbCaD | +B+0.-A+0.+B-1.-a+0.+B+1.-B+2.+A+1. | 1143.95 |

wtaylor@mull1:~/fewpred/pred2r4qA\$ head folds.best

|            |       |      |   |      |     |          |       |       |                |         |                                     |         |
|------------|-------|------|---|------|-----|----------|-------|-------|----------------|---------|-------------------------------------|---------|
| fold-4-0-1 | Build | Rank | 1 | Fold | 181 | 1217.459 | 55.23 | 22.05 | cCDdaABbeEfgG  | cDaBeFg | +B+0.-A+0.+B-1.-a+0.+B+1.-B+2.+A+1. | 4205.81 |
| fold-4-1-1 | Build | Rank | 1 | Fold | 181 | 1217.459 | 55.23 | 22.05 | cCDdaABbeEfgG  | cDaBeFg | +B+0.-A+0.+B-1.-a+0.+B+1.-B+2.+A+1. | 4375.06 |
| fold-3-1-1 | Build | Rank | 1 | Fold | 181 | 1157.376 | 54.60 | 21.20 | cCDdaABbeEfgG  | cDaBeFg | +B+0.-A+0.+B-1.-a+0.+B+1.-B+2.+A+1. | 4007.3  |
| fold-3-0-1 | Build | Rank | 1 | Fold | 181 | 1157.376 | 54.60 | 21.20 | cCDdaABbeEfgG  | cDaBeFg | +B+0.-A+0.+B-1.-a+0.+B+1.-B+2.+A+1. | 3439.09 |
| fold-2-1-1 | Build | Rank | 1 | Fold | 114 | 1157.226 | 46.40 | 24.94 | cCDdaABbeEfgG  | cDaBeFg | +B+0.-A+0.+B-1.-a+0.+B+1.-B+2.-A+1. | 2478.88 |
| fold-2-0-1 | Build | Rank | 1 | Fold | 114 | 1157.226 | 46.40 | 24.94 | cCDdaABbeEfgG  | cDaBeFg | +B+0.-A+0.+B-1.-a+0.+B+1.-B+2.-A+1. | 4751.84 |
| fold-3-1-2 | Build | Rank | 2 | Fold | 183 | 1146.891 | 47.02 | 24.39 | cCDdaABbeEfgG  | cDaBeFg | +B+0.-A+0.+B-1.-a+0.+B+1.-B+2.-A+1. | 2318.53 |
| fold-3-0-2 | Build | Rank | 2 | Fold | 183 | 1146.891 | 47.02 | 24.39 | cCDdaABbeEfgG  | cDaBeFg | +B+0.-A+0.+B-1.-a+0.+B+1.-B+2.-A+1. | 3824.3  |
| fold-9-1-1 | Build | Rank | 1 | Fold | 183 | 1144.679 | 52.66 | 21.74 | EegGFfbBCcaAdd | EgFbCaD | +B+0.-A+0.+B-1.-a+0.+B+1.-B+2.+A+1. | 4754.6  |
| fold-9-0-1 | Build | Rank | 1 | Fold | 183 | 1144.679 | 52.66 | 21.74 | EegGFfbBCcaAdd | EgFbCaD | +B+0.-A+0.+B-1.-a+0.+B+1.-B+2.+A+1. | 2955.84 |

wtaylor@mull1:~/fewpred/pred2r4qA\$ sort -nr -k9 folds.best | head

|            |       |      |   |      |     |          |       |       |               |         |                                     |         |
|------------|-------|------|---|------|-----|----------|-------|-------|---------------|---------|-------------------------------------|---------|
| fold-2-9-1 | Build | Rank | 1 | Fold | 177 | 1047.627 | 39.16 | 26.76 | DdgGFfeEBbAac | DgFeBAC | +B+0.-A+0.+B-1.-a+0.+B+1.-B+2.-A+1. | 4423.34 |
| fold-2-8-1 | Build | Rank | 1 | Fold | 177 | 1047.627 | 39.16 | 26.76 | DdgGFfeEBbAac | DgFeBAC | +B+0.-A+0.+B-1.-a+0.+B+1.-B+2.-A+1. | 4831.22 |
| fold-3-9-1 | Build | Rank | 1 | Fold | 44  | 1046.772 | 39.65 | 26.40 | DdgGFfeEBbAac | DgFeBAC | +B+0.-A+0.+B-1.-a+0.+B+1.-B+2.-A+1. | 4811.99 |
| fold-3-8-1 | Build | Rank | 1 | Fold | 44  | 1046.772 | 39.65 | 26.40 | DdgGFfeEBbAac | DgFeBAC | +B+0.-A+0.+B-1.-a+0.+B+1.-B+2.-A+1. | 4505.79 |
| fold-8-9-4 | Build | Rank | 4 | Fold | 177 | 932.545  | 35.42 | 26.33 | DdgGFfeEBbAac | DgFeBAC | +B+0.-A+0.+B-1.-a+0.+B+1.-B+2.-A+1. | 4304.11 |
| fold-8-8-4 | Build | Rank | 4 | Fold | 177 | 932.545  | 35.42 | 26.33 | DdgGFfeEBbAac | DgFeBAC | +B+0.-A+0.+B-1.-a+0.+B+1.-B+2.-A+1. | 3622.81 |
| fold-1-9-1 | Build | Rank | 1 | Fold | 44  | 1010.522 | 38.50 | 26.25 | DdgGFfeEBbAac | DgFeBAC | +B+0.-A+0.+B-1.-a+0.+B+1.-B+2.-A+1. | 4537.93 |
| fold-1-8-1 | Build | Rank | 1 | Fold | 44  | 1010.522 | 38.50 | 26.25 | DdgGFfeEBbAac | DgFeBAC | +B+0.-A+0.+B-1.-a+0.+B+1.-B+2.-A+1. | 3638.6  |
| fold-4-9-3 | Build | Rank | 3 | Fold | 44  | 1006.216 | 40.02 | 25.14 | DdgGFfeEBbAac | DgFeBAC | +B+0.-A+0.+B-1.-a+0.+B+1.-B+2.-A+1. | 5014.47 |
| fold-4-8-3 | Build | Rank | 3 | Fold | 44  | 1006.216 | 40.02 | 25.14 | DdgGFfeEBbAac | DgFeBAC | +B+0.-A+0.+B-1.-a+0.+B+1.-B+2.-A+1. | 4397.92 |

3a2eA (108) = +B+0.-A+0.+B+4.-B+3.+A-1.-B+1.+B+2

**Ginkbilobin-2, an antifungal protein from Ginkgo biloba.** The PLATO server made many models with the correct 0-4-2 architecture for this protein but the native protein contains a left-handed  $\beta\alpha\beta$  connection combined with a pair of crossing loops, both of which are filtered-out by PLATO.

111sA (111) = +B+0.-A+0.+B-1.-A-1.+B-2.+B-3.-a+0.+B+1

**A protein of Unknown Function MTH1491 from Methanobacterium thermoautotrophicum.** Ranked on the combined score, the top models were based on a small Form with 1-3-2 architecture and despite having the correct overall fold, the edge strands and some helices were poorly constrained. The reranked best list however had a model with the more complete 1-5-2 Form in top position with the correct fold.

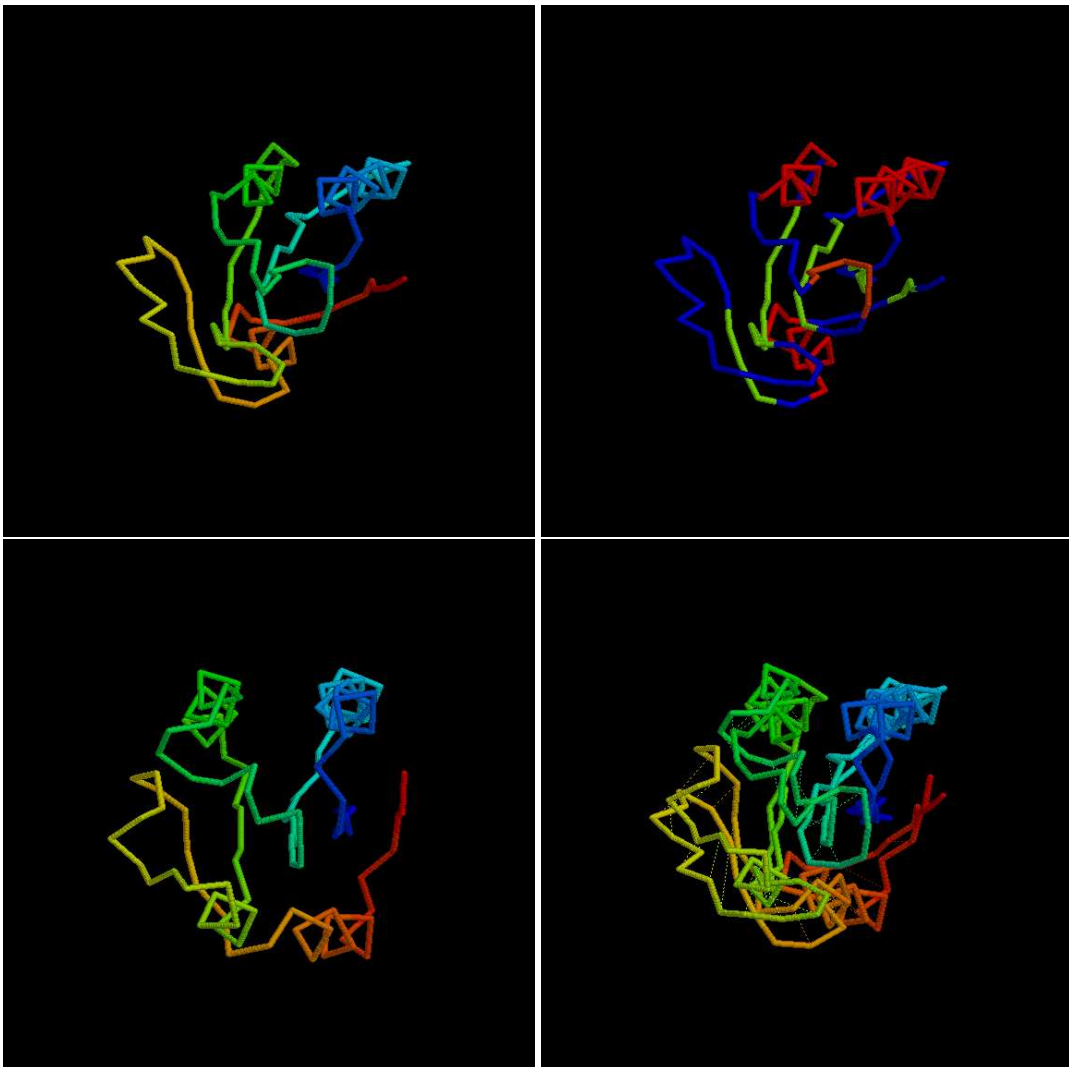

NDYSIMKTI L KQI GNLKNSMPDANI E VVFNRS AVKAL KGDEFMPKIKETI DS GVKI NACKNTLKE LKLS EDDVDSGI GI VTAAVEEIVRQAE EGYFYLQ  
KVVVQI KDFDKVPQAL RSVINLYNDI KDAEI E VVLHQSAI KAL KDS DTRS I I EDLI KKNLI LIGCENSI RSQNLS HDQLI PGI KIVTSGVGEIVRQKSEGWI YL  
KI I VHI DEMAKWPMVLNHLNHLAQAYPAPNNQI ELLVNGDAVMGV KEAEKIRHALTSQI VI AV CQNSLTQRKI TTEDLLNNS TI VASGVVELVEKQALGYHYLRP  
KL VFI NEPDKWQVIMNI NNFLNDVGQGNADI E VVANGA VSAFQTNKMLI EQMOKLAEI GVN FVACQNALKAQSI AKESLPEFVTVPAGI TEI ARKQTEGFAYI KP  
QDKVAYHVNEAQTQALATL RNI RNHLDTDPSAQI TVVTHANGVDL P NGGEYAATVSALVSRGVKFEI CEI TLKRNRLKKEQFI QEATFTP SGVVRLT KMQLGGYAYI KP  
MYHLTEGIEEAVRAM RNVRNHL DADPTAKI VVVANGAGI DFLKNGNPFDAI VQDLVTRHVEFRACRNTLTTRNI DPSKLLPEATLVQSGVAEAARLQAE GFAYLRP  
YKVVYQI SEGT EQAVRAI GNLRNHLNGAPGTRI VVVALGRGIDFLDKGRSFDAPVAALASMGVEFRVCHNSLAAFKVPEDKLLLEAKVVPAGVVEITRLOQEGFAYLKP  
KVVYQLSEGI DQAVRAM GNLRNHLNGAPGTKI VVVAFGYGVDFLSRGNTFEGPVGALASAGVEFRVCRNTLTARKI SESSLMESKI VPAGVVEIARLQFEGYAYI KP  
RVAVHLDER EKAALAL RNTKNLLEGLAGVEVEVVAHADGVEELRTGSPQAALTAQLADRGVRFVVCENTLRSRNLS EKDFPGYVGTVP SAI VELVVRQAE GWQLRP  
DYRVVFHI DE DDES RVLLI SNVRNLMADLESVRI E VVAYS MGVNVLRRDS EYS GDVSELTGQGVRF CACSNTLRAS GMDGDDLEEGVDVVS SGVGHIVRRQTEGWAYIRP

NDYSIMKTI L KQI GNLKNSMPDANI E VVFNRS AVKAL KGDEFMPKIKETI DS GVKI NACKNTLKE LKLS EDDVDSGI GI VTAAVEEIVRQAE EGYFYLQ  
KVVVQI KDFDKVPQAL RSVINLYNDI KDAEI E VVLHQSAI KAL KDS DTRS I I EDLI KKNLI LIGCENSI RSQNLS HDQLI PGI KIVTSGVGEIVRQKSEGWI YL  
KI I VHI DEMAKWPMVLNHLNHLAQAYPAPNNQI ELLVNGDAVMGV KEAEKIRHALTSQI VI AV CQNSLTQRKI TTEDLLNNS TI VASGVVELVEKQALGYHYLRP  
KL VFI NEPDKWQVIMNI NNFLNDVGQGNADI E VVANGA VSAFQTNKMLI EQMOKLAEI GVN FVACQNALKAQSI AKESLPEFVTVPAGI TEI ARKQTEGFAYI KP  
QDKVAYHVNEAQTQALATL RNI RNHLDTDPSAQI TVVTHANGVDL P NGGEYAATVSALVSRGVKFEI CEI TLKRNRLKKEQFI QEATFTP SGVVRLT KMQLGGYAYI KP  
MYHLTEGIEEAVRAM RNVRNHL DADPTAKI VVVANGAGI DFLKNGNPFDAI VQDLVTRHVEFRACRNTLTTRNI DPSKLLPEATLVQSGVAEAARLQAE GFAYLRP  
YKVVYQI SEGT EQAVRAI GNLRNHLNGAPGTRI VVVALGRGIDFLDKGRSFDAPVAALASMGVEFRVCHNSLAAFKVPEDKLLLEAKVVPAGVVEITRLOQEGFAYLKP  
KVVYQLSEGI DQAVRAM GNLRNHLNGAPGTKI VVVAFGYGVDFLSRGNTFEGPVGALASAGVEFRVCRNTLTARKI SESSLMESKI VPAGVVEIARLQFEGYAYI KP  
RVAVHLDER EKAALAL RNTKNLLEGLAGVEVEVVAHADGVEELRTGSPQAALTAQLADRGVRFVVCENTLRSRNLS EKDFPGYVGTVP SAI VELVVRQAE GWQLRP  
DYRVVFHI DE DDES RVLLI SNVRNLMADLESVRI E VVAYS MGVNVLRRDS EYS GDVSELTGQGVRF CACSNTLRAS GMDGDDLEEGVDVVS SGVGHIVRRQTEGWAYIRP

NDYSIMKTI L KQI GNLKNSMPDANI E VVFNRS AVKAL KGDEFMPKIKETI DS GVKI NACKNTLKE LKLS EDDVDSGI GI VTAAVEEIVRQAE EGYFYLQ  
KVVVQI KDFDKVPQAL RSVINLYNDI KDAEI E VVLHQSAI KAL KDS DTRS I I EDLI KKNLI LIGCENSI RSQNLS HDQLI PGI KIVTSGVGEIVRQKSEGWI YL  
KI I VHI DEMAKWPMVLNHLNHLAQAYPAPNNQI ELLVNGDAVMGV KEAEKIRHALTSQI VI AV CQNSLTQRKI TTEDLLNNS TI VASGVVELVEKQALGYHYLRP  
KL VFI NEPDKWQVIMNI NNFLNDVGQGNADI E VVANGA VSAFQTNKMLI EQMOKLAEI GVN FVACQNALKAQSI AKESLPEFVTVPAGI TEI ARKQTEGFAYI KP  
QDKVAYHVNEAQTQALATL RNI RNHLDTDPSAQI TVVTHANGVDL P NGGEYAATVSALVSRGVKFEI CEI TLKRNRLKKEQFI QEATFTP SGVVRLT KMQLGGYAYI KP  
MYHLTEGIEEAVRAM RNVRNHL DADPTAKI VVVANGAGI DFLKNGNPFDAI VQDLVTRHVEFRACRNTLTTRNI DPSKLLPEATLVQSGVAEAARLQAE GFAYLRP  
YKVVYQI SEGT EQAVRAI GNLRNHLNGAPGTRI VVVALGRGIDFLDKGRSFDAPVAALASMGVEFRVCHNSLAAFKVPEDKLLLEAKVVPAGVVEITRLOQEGFAYLKP  
KVVYQLSEGI DQAVRAM GNLRNHLNGAPGTKI VVVAFGYGVDFLSRGNTFEGPVGALASAGVEFRVCRNTLTARKI SESSLMESKI VPAGVVEIARLQFEGYAYI KP  
RVAVHLDER EKAALAL RNTKNLLEGLAGVEVEVVAHADGVEELRTGSPQAALTAQLADRGVRFVVCENTLRSRNLS EKDFPGYVGTVP SAI VELVVRQAE GWQLRP  
DYRVVFHI DE DDES RVLLI SNVRNLMADLESVRI E VVAYS MGVNVLRRDS EYS GDVSELTGQGVRF CACSNTLRAS GMDGDDLEEGVDVVS SGVGHIVRRQTEGWAYIRP

NDYSIMKTI L KQI GNLKNSMPDANI E VVFNRS AVKAL KGDEFMPKIKETI DS GVKI NACKNTLKE LKLS EDDVDSGI GI VTAAVEEIVRQAE EGYFYLQ  
KVVVQI KDFDKVPQAL RSVINLYNDI KDAEI E VVLHQSAI KAL KDS DTRS I I EDLI KKNLI LIGCENSI RSQNLS HDQLI PGI KIVTSGVGEIVRQKSEGWI YL  
KI I VHI DEMAKWPMVLNHLNHLAQAYPAPNNQI ELLVNGDAVMGV KEAEKIRHALTSQI VI AV CQNSLTQRKI TTEDLLNNS TI VASGVVELVEKQALGYHYLRP  
KL VFI NEPDKWQVIMNI NNFLNDVGQGNADI E VVANGA VSAFQTNKMLI EQMOKLAEI GVN FVACQNALKAQSI AKESLPEFVTVPAGI TEI ARKQTEGFAYI KP  
QDKVAYHVNEAQTQALATL RNI RNHLDTDPSAQI TVVTHANGVDL P NGGEYAATVSALVSRGVKFEI CEI TLKRNRLKKEQFI QEATFTP SGVVRLT KMQLGGYAYI KP  
MYHLTEGIEEAVRAM RNVRNHL DADPTAKI VVVANGAGI DFLKNGNPFDAI VQDLVTRHVEFRACRNTLTTRNI DPSKLLPEATLVQSGVAEAARLQAE GFAYLRP  
YKVVYQI SEGT EQAVRAI GNLRNHLNGAPGTRI VVVALGRGIDFLDKGRSFDAPVAALASMGVEFRVCHNSLAAFKVPEDKLLLEAKVVPAGVVEITRLOQEGFAYLKP  
KVVYQLSEGI DQAVRAM GNLRNHLNGAPGTKI VVVAFGYGVDFLSRGNTFEGPVGALASAGVEFRVCRNTLTARKI SESSLMESKI VPAGVVEIARLQFEGYAYI KP  
RVAVHLDER EKAALAL RNTKNLLEGLAGVEVEVVAHADGVEELRTGSPQAALTAQLADRGVRFVVCENTLRSRNLS EKDFPGYVGTVP SAI VELVVRQAE GWQLRP  
DYRVVFHI DE DDES RVLLI SNVRNLMADLESVRI E VVAYS MGVNVLRRDS EYS GDVSELTGQGVRF CACSNTLRAS GMDGDDLEEGVDVVS SGVGHIVRRQTEGWAYIRP



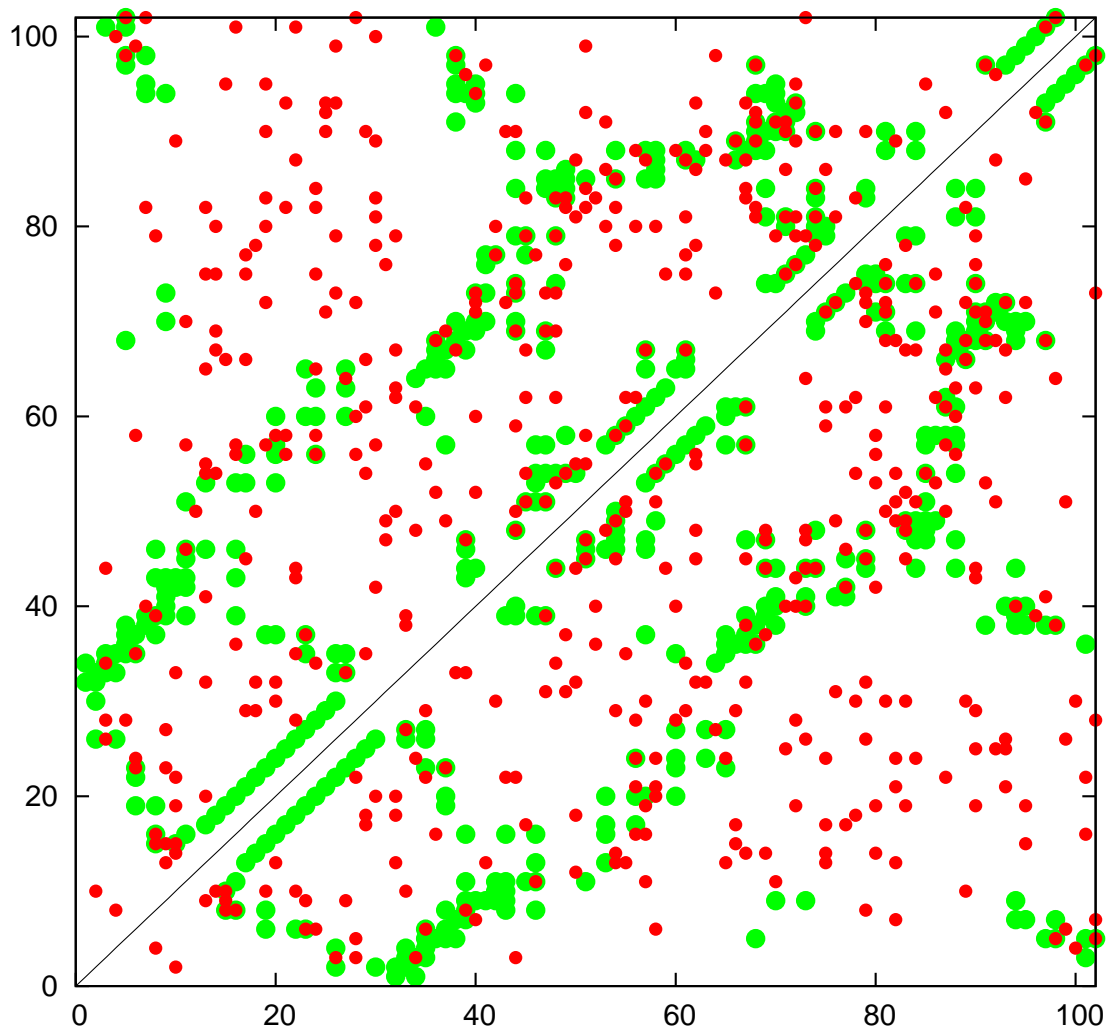

wtaylor@mull1:~/fewpred/pred111sA\$ head folds.sort

|                                      |       |      |   |      |     |         |       |       |                    |           |                                               |         |
|--------------------------------------|-------|------|---|------|-----|---------|-------|-------|--------------------|-----------|-----------------------------------------------|---------|
| buildd111sA/folds/fold-9-5-1:REMARK  | Build | Rank | 1 | Fold | 70  | 711.217 | 40.79 | 17.43 | aABbcCFfeEdD       | aBcFed    | +B+0.-A+0.+B-1.-A-1.+B-2.+a+0.                | 710.779 |
| buildd111sA/folds/fold-9-5-2:REMARK  | Build | Rank | 2 | Fold | 99  | 710.411 | 40.79 | 17.41 | EefFCcbBAaAdD      | EfCbAd    | +B+0.-A+0.+B-1.-A-1.+B-2.+a+0.                | 709.809 |
| buildd111sA/folds/fold-9-4-3:REMARK  | Build | Rank | 3 | Fold | 69  | 710.078 | 36.78 | 19.31 | aABbcCFfeEdD       | aBcFed    | +B+0.-A+0.+B-1.-A-1.+B-2.-a+0.                | 709.296 |
| buildd111sA/folds/fold-9-5-3:REMARK  | Build | Rank | 3 | Fold | 69  | 710.078 | 36.78 | 19.31 | aABbcCFfeEdD       | aBcFed    | +B+0.-A+0.+B-1.-A-1.+B-2.-a+0.                | 708.416 |
| buildd111sA/folds/fold-9-4-4:REMARK  | Build | Rank | 4 | Fold | 98  | 709.352 | 36.78 | 19.29 | EefFCcbBAaAdD      | EfCbAd    | +B+0.-A+0.+B-1.-A-1.+B-2.-a+0.                | 708.352 |
| buildd111sA/folds/fold-9-5-4:REMARK  | Build | Rank | 4 | Fold | 98  | 709.352 | 36.78 | 19.29 | EefFCcbBAaAdD      | EfCbAd    | +B+0.-A+0.+B-1.-A-1.+B-2.-a+0.                | 707.902 |
| buildd111sA/folds/fold-9-5-6:REMARK  | Build | Rank | 6 | Fold | 100 | 623.324 | 40.35 | 15.45 | EefFCcbBAaAdD      | EfCbAd    | +B+0.-A+0.+B-1.-A-1.-B-2.+a+0.                | 621.322 |
| buildd111sA/folds/fold-9-3-2:REMARK  | Build | Rank | 2 | Fold | 23  | 608.719 | 37.84 | 16.09 | eEFfcCDdaAbB       | eFcDab    | +B+0.-A+0.+B-1.-A-1.+B-2.+a+0.                | 607.525 |
| buildd111sA/folds/fold-18-1-1:REMARK | Build | Rank | 1 | Fold | 362 | 603.768 | 24.43 | 24.72 | CcbBEefFGgiIHhdDaa | CbEfGiHdA | +B+0.-A+0.+B-1.-A-1.+B-2.-A-2.+B-3.-a+0.+B+1. | 603.202 |
| buildd111sA/folds/fold-18-0-1:REMARK | Build | Rank | 1 | Fold | 362 | 603.768 | 24.43 | 24.72 | CcbBEefFGgiIHhdDaa | CbEfGiHdA | +B+0.-A+0.+B-1.-A-1.+B-2.-A-2.+B-3.-a+0.+B+1. | 603.065 |

wtaylor@mull1:~/fewpred/pred111sA\$ head folds.best

|             |       |      |   |      |     |         |       |       |                    |           |                                               |         |
|-------------|-------|------|---|------|-----|---------|-------|-------|--------------------|-----------|-----------------------------------------------|---------|
| fold-9-5-1  | Build | Rank | 1 | Fold | 70  | 711.217 | 40.79 | 17.43 | aABbcCFfeEdD       | aBcFed    | +B+0.-A+0.+B-1.-A-1.+B-2.+a+0.                | 4936.69 |
| fold-9-5-2  | Build | Rank | 2 | Fold | 99  | 710.411 | 40.79 | 17.41 | EefFCcbBAaAdD      | EfCbAd    | +B+0.-A+0.+B-1.-A-1.+B-2.+a+0.                | 3123.17 |
| fold-9-4-3  | Build | Rank | 3 | Fold | 69  | 710.078 | 36.78 | 19.31 | aABbcCFfeEdD       | aBcFed    | +B+0.-A+0.+B-1.-A-1.+B-2.-a+0.                | 2306.36 |
| fold-9-5-3  | Build | Rank | 3 | Fold | 69  | 710.078 | 36.78 | 19.31 | aABbcCFfeEdD       | aBcFed    | +B+0.-A+0.+B-1.-A-1.+B-2.-a+0.                | 2180.46 |
| fold-9-4-4  | Build | Rank | 4 | Fold | 98  | 709.352 | 36.78 | 19.29 | EefFCcbBAaAdD      | EfCbAd    | +B+0.-A+0.+B-1.-A-1.+B-2.-a+0.                | 3217.71 |
| fold-9-5-4  | Build | Rank | 4 | Fold | 98  | 709.352 | 36.78 | 19.29 | EefFCcbBAaAdD      | EfCbAd    | +B+0.-A+0.+B-1.-A-1.+B-2.-a+0.                | 2820.8  |
| fold-9-5-6  | Build | Rank | 6 | Fold | 100 | 623.324 | 40.35 | 15.45 | EefFCcbBAaAdD      | EfCbAd    | +B+0.-A+0.+B-1.-A-1.-B-2.+a+0.                | 3709.19 |
| fold-9-3-2  | Build | Rank | 2 | Fold | 23  | 608.719 | 37.84 | 16.09 | eEFfcCDdaAbB       | eFcDab    | +B+0.-A+0.+B-1.-A-1.+B-2.+a+0.                | 3371.93 |
| fold-18-1-1 | Build | Rank | 1 | Fold | 362 | 603.768 | 24.43 | 24.72 | CcbBEefFGgiIHhdDaa | CbEfGiHdA | +B+0.-A+0.+B-1.-A-1.+B-2.-A-2.+B-3.-a+0.+B+1. | 2188.78 |
| fold-18-0-1 | Build | Rank | 1 | Fold | 362 | 603.768 | 24.43 | 24.72 | CcbBEefFGgiIHhdDaa | CbEfGiHdA | +B+0.-A+0.+B-1.-A-1.+B-2.-A-2.+B-3.-a+0.+B+1. | 2072.08 |

wtaylor@mull1:~/fewpred/pred111sA\$ sort -nr -k9 folds.best | head

|              |       |      |    |      |     |         |       |       |                     |           |                                               |         |
|--------------|-------|------|----|------|-----|---------|-------|-------|---------------------|-----------|-----------------------------------------------|---------|
| fold-15-17-1 | Build | Rank | 1  | Fold | 406 | 560.596 | 18.70 | 29.97 | BbcCDdgGFfHheEaA    | BcDgFHeA  | +B+0.-A+0.+B-1.-A-1.+B-2.+B-3.-a+0.+B+1.      | 2287.64 |
| fold-26-17-1 | Build | Rank | 1  | Fold | 838 | 548.242 | 18.70 | 29.31 | BbcCDdgGFfHheEaA    | BcDgFHeA  | +B+0.-A+0.+B-1.-A-1.+B-2.+B-3.-a+0.+B+1.      | 3783.01 |
| fold-26-16-1 | Build | Rank | 1  | Fold | 838 | 548.242 | 18.70 | 29.31 | BbcCDdgGFfHheEaA    | BcDgFHeA  | +B+0.-A+0.+B-1.-A-1.+B-2.+B-3.-a+0.+B+1.      | 3291.21 |
| fold-4-0-7   | Build | Rank | 14 | Fold | 103 | 386.648 | 14.59 | 26.51 | GghHiiFfbBaaCcdDee  | GhIFbACde | +B+0.-A+0.+B-1.+a+0.-a+1.+B+3.+B+2.-A+1.+B+1. | 1551.03 |
| fold-4-0-6   | Build | Rank | 11 | Fold | 449 | 386.652 | 14.59 | 26.51 | CcbBAAdDdhHiiGgFfEe | CbADhIGfE | +B+0.-A+0.+B-1.+a+0.-a+1.+B+3.+B+2.-A+1.+B+1. | 1606.33 |
| fold-26-17-4 | Build | Rank | 6  | Fold | 21  | 426.427 | 17.07 | 24.98 | AacCDdgGFfHheEBb    | AcDgFHeB  | +B+0.-A+0.+B-2.-A-1.+B-3.+B-4.-a+0.+B-1.      | 2274.83 |
| fold-26-16-4 | Build | Rank | 6  | Fold | 21  | 426.427 | 17.07 | 24.98 | AacCDdgGFfHheEBb    | AcDgFHeB  | +B+0.-A+0.+B-2.-A-1.+B-3.+B-4.-a+0.+B-1.      | 3439.67 |
| fold-8-9-1   | Build | Rank | 1  | Fold | 26  | 530.064 | 21.42 | 24.74 | BbcCDdgGFfEeEaA     | BcDgFeA   | +B+0.-A+0.+B-1.-A-1.+B-2.-a+0.+B+1.           | 3925.81 |
| fold-8-8-1   | Build | Rank | 1  | Fold | 26  | 530.064 | 21.42 | 24.74 | BbcCDdgGFfEeEaA     | BcDgFeA   | +B+0.-A+0.+B-1.-A-1.+B-2.-a+0.+B+1.           | 3000.81 |
| fold-18-1-1  | Build | Rank | 1  | Fold | 362 | 603.768 | 24.43 | 24.72 | CcbBEefFGgiIHhdDaa  | CbEfGiHdA | +B+0.-A+0.+B-1.-A-1.+B-2.-A-2.+B-3.-a+0.+B+1. | 2188.78 |

3guvA (149) = +B+0.-A+0.+B-1.-a+0.+B+1.-a+1.+B+2.(-A+1)

A resolvase family site-specific recombinase from *Streptococcus pneumoniae*. Under all rankings, the top folds corresponded to the native with the exception of the orientation of the long terminal  $\alpha$ -helix which does not pack on the  $\beta$ -sheet but forms a coiled-coil in the dimeric native structure. Excluding this helix after the chain break in the structure (leaving 121 residues) the top models were all correct.

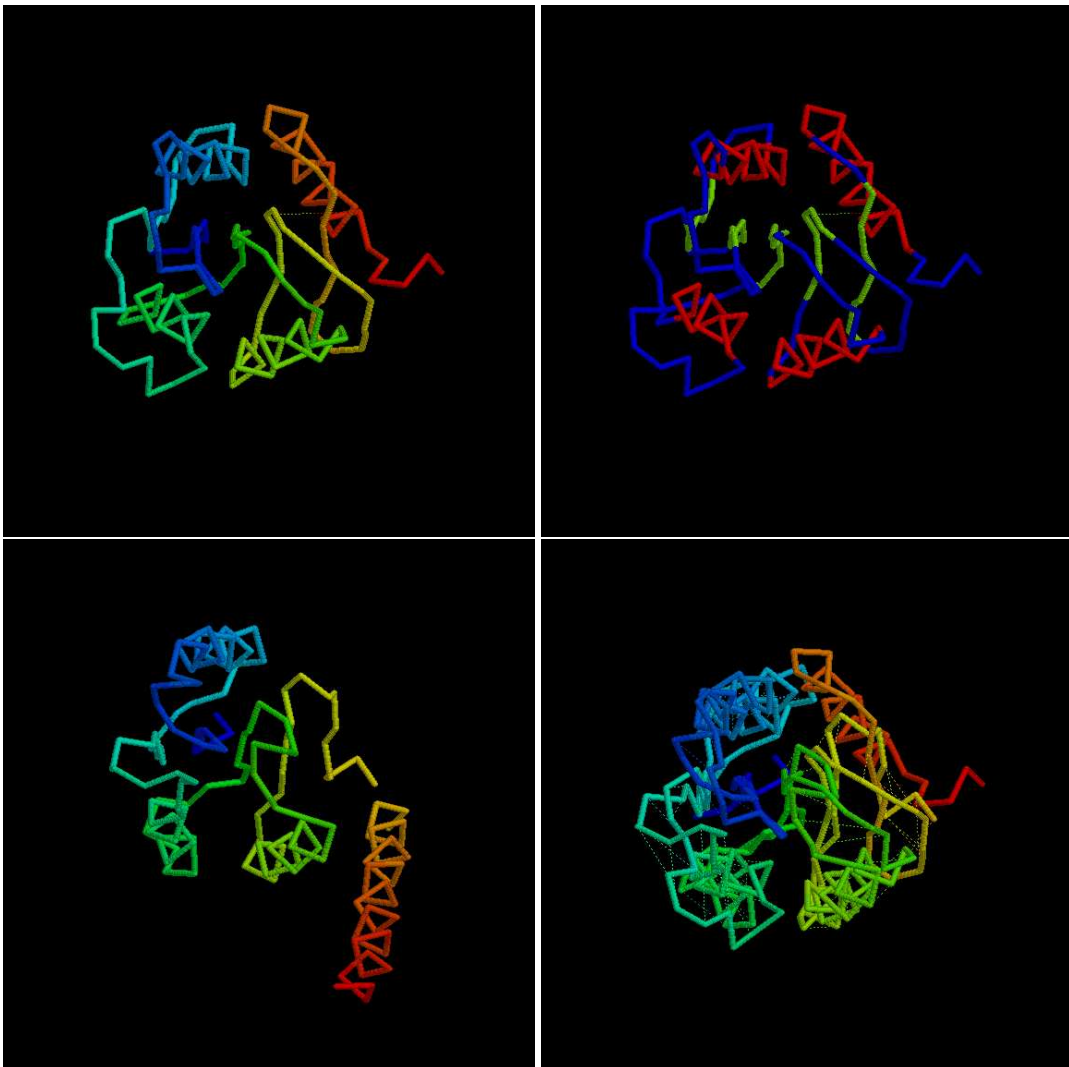

ALRAALYLRVSTARAEDHVSIPDQRKQGETYCASRGYVLVDVFEAGASATNDRPPEFQRM EAGTS KPAPFDVVVHFSFRDHFLELEFYVRKRLARNGVRLVSTOE MGDHVMRQIMALPDEYQSKENAKHVLRAKKNARQ  
PLRAAVYLVRVSTGRAEAGEVSI PSORDL TTRHCLSSGWTVVDEYVPEPGASATDDRPFVQAMLERACADADHPYDVI VVHFSFRDHFLELEFYVRKRLARNGVRLVSTOE MGDHVMRQIMALPDEYQSKENAKHVLRAKKNARQ  
NMKGII YVVRVSDVVK GTSLENODEL CRAYCONKGI EYVEI FREGASAKTAQRAEFLRAI EYCRKNGKGVDAFVYVKVDRARNTEDFH YVRKMLI BYGVTLHSTVEP I GNNKFI ETVLAGSAEFDNAVTRQCVDGMSAR  
MKVALYARVSEADV ELSIAAQLRALRDYAAKNEQOIVYEFIDEASGRTASRPEFKMI ALAKSNTSPFEALVWVYSFRARNVDSI TYKTLQKGGI KVI SI NEP LDDTGKLMGI ESI DEFPYSANL GQDI KRGMKNA  
MKI GYARVSTGL QNLNQEDRLNQYGC E KIFSDHISG AKSRPGFLDRAI EFARSQD I VVWRLDGRGNMADLI TLVNLNRRGVSFHSL EENMDKSSGQLLHLFAAF AEFERNLI LERS SAGRI AARAR  
RVFAYCRVSTLE QTTNORREI EAAGFAVRPQ LI EEEHISGSVAASDRPGPI RLLDRMNGDVI LI VTKLDRGNAMDIRKTVEQLTETGI RVHCLALGDLTSGKMMQVISAFAEFERDILLERTHSGI VRA  
RIFAYCRI STLD QTTNORREI ESAGFKI KPI QI EEEHISGSAAATSERPGFNLLARLKKGGD LI VTKLDRGNAMDIRKTVEQLTETGI RVHCLALGDLTSGKMMQVISAFAEFERDILLERTHSGI VRA  
DRQFNSLDAQYEASSAYIKSQAHAVKTRYDDGGFSGGSTDRPALQSLLEDI RARKI DV I VVYKVDNTRSLADPAKLVELPDAHRVSVSVTQQFNNTTGRLLTNVLLSFAQFEREVTSEIRDKVAASKK  
LRCAI YTRKSS EEDQDFNSLDAQREACEAYIASQRHELAHYDDGGISGGTLE RPALORLLADI DAGRI DL I VVYKVDNTRSLADPAKLVELPDAHRVSVSVTQQFNNTTGRLLTNVLLSFAQFEREVTSEIRDKVAASKK  
VRCGI YTRVSTDDNDQEFNSLDAQYEASSAYIKSQAHAVKTRYDDGGFSGGSTDRPALONLLEDI RTRKI DV I VVYKVDNTRSLADPAKLVELPDAHRVSVSVTQQFNNTTGRLLTNVLLSFAQFEREVTSEIRDKVAASKK  
KRCVAVTRKSS EEEEMFNSLDAQREACEAYIASQRHELAHYDDGGISGGTLE RPALORLLADI EAGRI DV I VVYKVDNTRSLADPAKLVELPDAHRVSVSVTQQFNNTTGRLLTNVLLSFAQFEREVTSEIRDKVAASKK  
QKRVGI YVVRVSTLSTEGYSIDGOI NOI REYCDNFNVVVDYADRGI SSKS MN RPALORLLADKANEQI DS VMYKTNLARNSTDLKIVEDLHQNVFFSLSERMEVNTGKMLQI LASF EFERNNI VEVV MGOTRR  
TKRVGI YVVRVSTLSTEGYSIDGOI NOI REYCDNFNVVVDYADRGI SSKS MN RPALORLLADKANEQI DS VMYKTNLARNSTDLKIVEDLHQNVFFSLSERMEVNTGKMLQI LASF EFERNNI VEVV MGOTRR  
MRI AI YRRI STTEQSD FSLAQEAKCLAYIEHQWTHI KTYTDEGISGAK ESRPALDQLRYDAQNKRFDVI L VHLBLSARGMRI QENI LHEFMNLKVRLLI ALKDFGDSANSMLMAQFMGI I NOQYDNL RWHI QKGLQKAE  
KI KVVLYTRVSTSI QIEGYSLEAOKSRMKAFALINDVEI VGEYEDAGSKS GKS I ERFQNRMMEDI KSGKDGVSFVLFKLS EARNADVLSITLQIMODYGVNLI CVEDGIDSSKDKLMSVLSAVAIEERENIRI QTMEGCI QKARE

ALRAALYLRVSTARAEDHVSIPDQRKQGETYCASRGYVLVDVFEAGASATNDRPPEFQRM EAGTS KPAPFDVVVHFSFRDHFLELEFYVRKRLARNGVRLVSTOE MGDHVMRQIMALPDEYQSKENAKHVLRAKKNARQ  
PLRAAVYLVRVSTGRAEAGEVSI PSORDL TTRHCLSSGWTVVDEYVPEPGASATDDRPFVQAMLERACADADHPYDVI VVHFSFRDHFLELEFYVRKRLARNGVRLVSTOE MGDHVMRQIMALPDEYQSKENAKHVLRAKKNARQ  
NMKGII YVVRVSDVVK GTSLENODEL CRAYCONKGI EYVEI FREGASAKTAQRAEFLRAI EYCRKNGKGVDAFVYVKVDRARNTEDFH YVRKMLI BYGVTLHSTVEP I GNNKFI ETVLAGSAEFDNAVTRQCVDGMSAR  
MKVALYARVSEADV ELSIAAQLRALRDYAAKNEQOIVYEFIDEASGRTASRPEFKMI ALAKSNTSPFEALVWVYSFRARNVDSI TYKTLQKGGI KVI SI NEP LDDTGKLMGI ESI DEFPYSANL GQDI KRGMKNA  
MKI GYARVSTGL QNLNQEDRLNQYGC E KIFSDHISG AKSRPGFLDRAI EFARSQD I VVWRLDGRGNMADLI TLVNLNRRGVSFHSL EENMDKSSGQLLHLFAAF AEFERNLI LERS SAGRI AARAR  
RVFAYCRVSTLE QTTNORREI EAAGFAVRPQ LI EEEHISGSVAASDRPGPI RLLDRMNGDVI LI VTKLDRGNAMDIRKTVEQLTETGI RVHCLALGDLTSGKMMQVISAFAEFERDILLERTHSGI VRA  
RIFAYCRI STLD QTTNORREI ESAGFKI KPI QI EEEHISGSAAATSERPGFNLLARLKKGGD LI VTKLDRGNAMDIRKTVEQLTETGI RVHCLALGDLTSGKMMQVISAFAEFERDILLERTHSGI VRA  
DRQFNSLDAQYEASSAYIKSQAHAVKTRYDDGGFSGGSTDRPALQSLLEDI RARKI DV I VVYKVDNTRSLADPAKLVELPDAHRVSVSVTQQFNNTTGRLLTNVLLSFAQFEREVTSEIRDKVAASKK  
LRCAI YTRKSS EEDQDFNSLDAQREACEAYIASQRHELAHYDDGGISGGTLE RPALORLLADI DAGRI DL I VVYKVDNTRSLADPAKLVELPDAHRVSVSVTQQFNNTTGRLLTNVLLSFAQFEREVTSEIRDKVAASKK  
VRCGI YTRVSTDDNDQEFNSLDAQYEASSAYIKSQAHAVKTRYDDGGFSGGSTDRPALONLLEDI RTRKI DV I VVYKVDNTRSLADPAKLVELPDAHRVSVSVTQQFNNTTGRLLTNVLLSFAQFEREVTSEIRDKVAASKK  
KRCVAVTRKSS EEEEMFNSLDAQREACEAYIASQRHELAHYDDGGISGGTLE RPALORLLADI EAGRI DV I VVYKVDNTRSLADPAKLVELPDAHRVSVSVTQQFNNTTGRLLTNVLLSFAQFEREVTSEIRDKVAASKK  
QKRVGI YVVRVSTLSTEGYSIDGOI NOI REYCDNFNVVVDYADRGI SSKS MN RPALORLLADKANEQI DS VMYKTNLARNSTDLKIVEDLHQNVFFSLSERMEVNTGKMLQI LASF EFERNNI VEVV MGOTRR  
TKRVGI YVVRVSTLSTEGYSIDGOI NOI REYCDNFNVVVDYADRGI SSKS MN RPALORLLADKANEQI DS VMYKTNLARNSTDLKIVEDLHQNVFFSLSERMEVNTGKMLQI LASF EFERNNI VEVV MGOTRR  
MRI AI YRRI STTEQSD FSLAQEAKCLAYIEHQWTHI KTYTDEGISGAK ESRPALDQLRYDAQNKRFDVI L VHLBLSARGMRI QENI LHEFMNLKVRLLI ALKDFGDSANSMLMAQFMGI I NOQYDNL RWHI QKGLQKAE  
KI KVVLYTRVSTSI QIEGYSLEAOKSRMKAFALINDVEI VGEYEDAGSKS GKS I ERFQNRMMEDI KSGKDGVSFVLFKLS EARNADVLSITLQIMODYGVNLI CVEDGIDSSKDKLMSVLSAVAIEERENIRI QTMEGCI QKARE

ALRAALYLRVSTARAEDHVSIPDQRKQGETYCASRGYVLVDVFEAGASATNDRPPEFQRM EAGTS KPAPFDVVVHFSFRDHFLELEFYVRKRLARNGVRLVSTOE MGDHVMRQIMALPDEYQSKENAKHVLRAKKNARQ  
PLRAAVYLVRVSTGRAEAGEVSI PSORDL TTRHCLSSGWTVVDEYVPEPGASATDDRPFVQAMLERACADADHPYDVI VVHFSFRDHFLELEFYVRKRLARNGVRLVSTOE MGDHVMRQIMALPDEYQSKENAKHVLRAKKNARQ  
NMKGII YVVRVSDVVK GTSLENODEL CRAYCONKGI EYVEI FREGASAKTAQRAEFLRAI EYCRKNGKGVDAFVYVKVDRARNTEDFH YVRKMLI BYGVTLHSTVEP I GNNKFI ETVLAGSAEFDNAVTRQCVDGMSAR  
MKVALYARVSEADV ELSIAAQLRALRDYAAKNEQOIVYEFIDEASGRTASRPEFKMI ALAKSNTSPFEALVWVYSFRARNVDSI TYKTLQKGGI KVI SI NEP LDDTGKLMGI ESI DEFPYSANL GQDI KRGMKNA  
MKI GYARVSTGL QNLNQEDRLNQYGC E KIFSDHISG AKSRPGFLDRAI EFARSQD I VVWRLDGRGNMADLI TLVNLNRRGVSFHSL EENMDKSSGQLLHLFAAF AEFERNLI LERS SAGRI AARAR  
RVFAYCRVSTLE QTTNORREI EAAGFAVRPQ LI EEEHISGSVAASDRPGPI RLLDRMNGDVI LI VTKLDRGNAMDIRKTVEQLTETGI RVHCLALGDLTSGKMMQVISAFAEFERDILLERTHSGI VRA  
RIFAYCRI STLD QTTNORREI ESAGFKI KPI QI EEEHISGSAAATSERPGFNLLARLKKGGD LI VTKLDRGNAMDIRKTVEQLTETGI RVHCLALGDLTSGKMMQVISAFAEFERDILLERTHSGI VRA  
DRQFNSLDAQYEASSAYIKSQAHAVKTRYDDGGFSGGSTDRPALQSLLEDI RARKI DV I VVYKVDNTRSLADPAKLVELPDAHRVSVSVTQQFNNTTGRLLTNVLLSFAQFEREVTSEIRDKVAASKK  
LRCAI YTRKSS EEDQDFNSLDAQREACEAYIASQRHELAHYDDGGISGGTLE RPALORLLADI DAGRI DL I VVYKVDNTRSLADPAKLVELPDAHRVSVSVTQQFNNTTGRLLTNVLLSFAQFEREVTSEIRDKVAASKK  
VRCGI YTRVSTDDNDQEFNSLDAQYEASSAYIKSQAHAVKTRYDDGGFSGGSTDRPALONLLEDI RTRKI DV I VVYKVDNTRSLADPAKLVELPDAHRVSVSVTQQFNNTTGRLLTNVLLSFAQFEREVTSEIRDKVAASKK  
KRCVAVTRKSS EEEEMFNSLDAQREACEAYIASQRHELAHYDDGGISGGTLE RPALORLLADI EAGRI DV I VVYKVDNTRSLADPAKLVELPDAHRVSVSVTQQFNNTTGRLLTNVLLSFAQFEREVTSEIRDKVAASKK  
QKRVGI YVVRVSTLSTEGYSIDGOI NOI REYCDNFNVVVDYADRGI SSKS MN RPALORLLADKANEQI DS VMYKTNLARNSTDLKIVEDLHQNVFFSLSERMEVNTGKMLQI LASF EFERNNI VEVV MGOTRR  
TKRVGI YVVRVSTLSTEGYSIDGOI NOI REYCDNFNVVVDYADRGI SSKS MN RPALORLLADKANEQI DS VMYKTNLARNSTDLKIVEDLHQNVFFSLSERMEVNTGKMLQI LASF EFERNNI VEVV MGOTRR  
MRI AI YRRI STTEQSD FSLAQEAKCLAYIEHQWTHI KTYTDEGISGAK ESRPALDQLRYDAQNKRFDVI L VHLBLSARGMRI QENI LHEFMNLKVRLLI ALKDFGDSANSMLMAQFMGI I NOQYDNL RWHI QKGLQKAE  
KI KVVLYTRVSTSI QIEGYSLEAOKSRMKAFALINDVEI VGEYEDAGSKS GKS I ERFQNRMMEDI KSGKDGVSFVLFKLS EARNADVLSITLQIMODYGVNLI CVEDGIDSSKDKLMSVLSAVAIEERENIRI QTMEGCI QKARE

ALRAALYLRVSTARAEDHVSIPDQRKQGETYCASRGYVLVDVFEAGASATNDRPPEFQRM EAGTS KPAPFDVVVHFSFRDHFLELEFYVRKRLARNGVRLVSTOE MGDHVMRQIMALPDEYQSKENAKHVLRAKKNARQ  
PLRAAVYLVRVSTGRAEAGEVSI PSORDL TTRHCLSSGWTVVDEYVPEPGASATDDRPFVQAMLERACADADHPYDVI VVHFSFRDHFLELEFYVRKRLARNGVRLVSTOE MGDHVMRQIMALPDEYQSKENAKHVLRAKKNARQ  
NMKGII YVVRVSDVVK GTSLENODEL CRAYCONKGI EYVEI FREGASAKTAQRAEFLRAI EYCRKNGKGVDAFVYVKVDRARNTEDFH YVRKMLI BYGVTLHSTVEP I GNNKFI ETVLAGSAEFDNAVTRQCVDGMSAR  
MKVALYARVSEADV ELSIAAQLRALRDYAAKNEQOIVYEFIDEASGRTASRPEFKMI ALAKSNTSPFEALVWVYSFRARNVDSI TYKTLQKGGI KVI SI NEP LDDTGKLMGI ESI DEFPYSANL GQDI KRGMKNA  
MKI GYARVSTGL QNLNQEDRLNQYGC E KIFSDHISG AKSRPGFLDRAI EFARSQD I VVWRLDGRGNMADLI TLVNLNRRGVSFHSL EENMDKSSGQLLHLFAAF AEFERNLI LERS SAGRI AARAR  
RVFAYCRVSTLE QTTNORREI EAAGFAVRPQ LI EEEHISGSVAASDRPGPI RLLDRMNGDVI LI VTKLDRGNAMDIRKTVEQLTETGI RVHCLALGDLTSGKMMQVISAFAEFERDILLERTHSGI VRA  
RIFAYCRI STLD QTTNORREI ESAGFKI KPI QI EEEHISGSAAATSERPGFNLLARLKKGGD LI VTKLDRGNAMDIRKTVEQLTETGI RVHCLALGDLTSGKMMQVISAFAEFERDILLERTHSGI VRA  
DRQFNSLDAQYEASSAYIKSQAHAVKTRYDDGGFSGGSTDRPALQSLLEDI RARKI DV I VVYKVDNTRSLADPAKLVELPDAHRVSVSVTQQFNNTTGRLLTNVLLSFAQFEREVTSEIRDKVAASKK  
LRCAI YTRKSS EEDQDFNSLDAQREACEAYIASQRHELAHYDDGGISGGTLE RPALORLLADI DAGRI DL I VVYKVDNTRSLADPAKLVELPDAHRVSVSVTQQFNNTTGRLLTNVLLSFAQFEREVTSEIRDKVAASKK  
VRCGI YTRVSTDDNDQEFNSLDAQYEASSAYIKSQAHAVKTRYDDGGFSGGSTDRPALONLLEDI RTRKI DV I VVYKVDNTRSLADPAKLVELPDAHRVSVSVTQQFNNTTGRLLTNVLLSFAQFEREVTSEIRDKVAASKK  
KRCVAVTRKSS EEEEMFNSLDAQREACEAYIASQRHELAHYDDGGISGGTLE RPALORLLADI EAGRI DV I VVYKVDNTRSLADPAKLVELPDAHRVSVSVTQQFNNTTGRLLTNVLLSFAQFEREVTSEIRDKVAASKK  
QKRVGI YVVRVSTLSTEGYSIDGOI NOI REYCDNFNVVVDYADRGI SSKS MN RPALORLLADKANEQI DS VMYKTNLARNSTDLKIVEDLHQNVFFSLSERMEVNTGKMLQI LASF EFERNNI VEVV MGOTRR  
TKRVGI YVVRVSTLSTEGYSIDGOI NOI REYCDNFNVVVDYADRGI SSKS MN RPALORLLADKANEQI DS VMYKTNLARNSTDLKIVEDLHQNVFFSLSERMEVNTGKMLQI LASF EFERNNI VEVV MGOTRR  
MRI AI YRRI STTEQSD FSLAQEAKCLAYIEHQWTHI KTYTDEGISGAK ESRPALDQLRYDAQNKRFDVI L VHLBLSARGMRI QENI LHEFMNLKVRLLI ALKDFGDSANSMLMAQFMGI I NOQYDNL RWHI QKGLQKAE  
KI KVVLYTRVSTSI QIEGYSLEAOKSRMKAFALINDVEI VGEYEDAGSKS GKS I ERFQNRMMEDI KSGKDGVSFVLFKLS EARNADVLSITLQIMODYGVNLI CVEDGIDSSKDKLMSVLSAVAIEERENIRI QTMEGCI QKARE

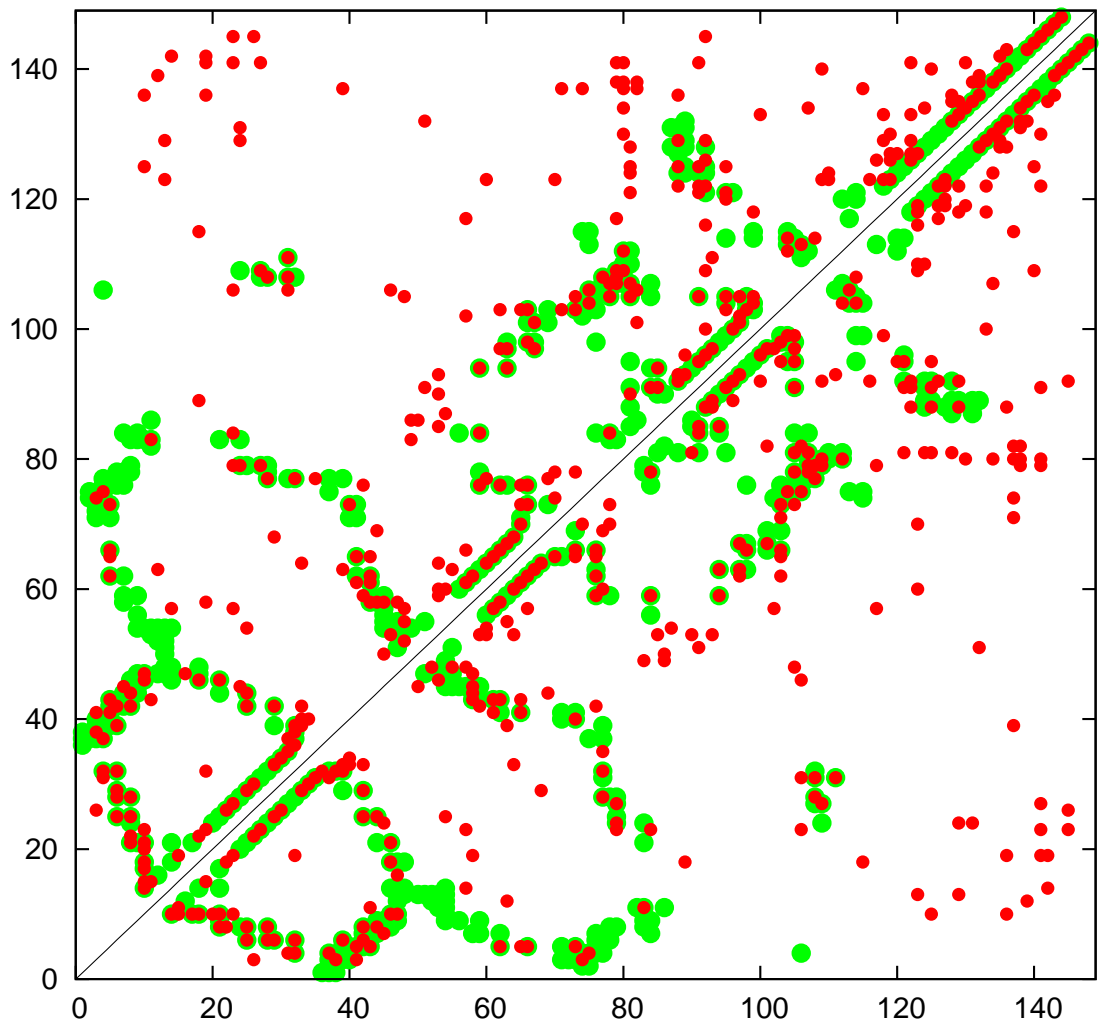

wtaylor@mull1:~/fewpred/pred3guvA\$ head folds.sort

| Build Rank                         | Fold       | 1 | Fold | 1   | 1669.002 | 34.45 | 48.45 | CcbBAadDEehHGgFf | CbAdEhGf | +B+0.-A+0.+B-1.-a+0.+B+1.-a+1.+B+2.-A+1. | 1668.22 |
|------------------------------------|------------|---|------|-----|----------|-------|-------|------------------|----------|------------------------------------------|---------|
| build3guvA/folds/fold-4-1-1:REMARK | Build Rank | 1 | Fold | 1   | 1669.002 | 34.45 | 48.45 | CcbBAadDEehHGgFf | CbAdEhGf | +B+0.-A+0.+B-1.-a+0.+B+1.-a+1.+B+2.-A+1. | 1668.13 |
| build3guvA/folds/fold-4-0-1:REMARK | Build Rank | 1 | Fold | 1   | 1649.208 | 39.22 | 42.05 | CcbBAadDEehHGgFf | CbAdEhGf | +B+0.-A+0.+B-1.-a+0.+B+1.-a+1.+B+2.-A+1. | 1648.87 |
| build3guvA/folds/fold-0-0-1:REMARK | Build Rank | 1 | Fold | 1   | 1649.208 | 39.22 | 42.05 | CcbBAadDEehHGgFf | CbAdEhGf | +B+0.-A+0.+B-1.-a+0.+B+1.-a+1.+B+2.-A+1. | 1648.37 |
| build3guvA/folds/fold-0-4-1:REMARK | Build Rank | 1 | Fold | 1   | 1634.165 | 38.89 | 42.02 | CcbBAadDEehHGgFf | CbAdEhGf | +B+0.-A+0.+B-1.-a+0.+B+1.-a+1.+B+2.-A+1. | 1633.77 |
| build3guvA/folds/fold-0-5-1:REMARK | Build Rank | 1 | Fold | 1   | 1634.165 | 38.89 | 42.02 | CcbBAadDEehHGgFf | CbAdEhGf | +B+0.-A+0.+B-1.-a+0.+B+1.-a+1.+B+2.-A+1. | 1633.2  |
| build3guvA/folds/fold-0-5-2:REMARK | Build Rank | 2 | Fold | 298 | 1618.097 | 38.89 | 41.61 | EehHGgFfCcbBAadD | EhGfCbAd | +B+0.-A+0.+B-1.-a+0.+B+1.-a+1.+B+2.-A+1. | 1617.53 |
| build3guvA/folds/fold-0-4-2:REMARK | Build Rank | 2 | Fold | 298 | 1618.097 | 38.89 | 41.61 | EehHGgFfCcbBAadD | EhGfCbAd | +B+0.-A+0.+B-1.-a+0.+B+1.-a+1.+B+2.-A+1. | 1616.77 |
| build3guvA/folds/fold-5-1-1:REMARK | Build Rank | 1 | Fold | 1   | 1612.850 | 34.75 | 46.41 | CcbBAadDEehHGgFf | CbAdEhGf | +B+0.-A+0.+B-1.-a+0.+B+1.-a+1.+B+2.-A+1. | 1612.08 |
| build3guvA/folds/fold-5-0-1:REMARK | Build Rank | 1 | Fold | 1   | 1612.850 | 34.75 | 46.41 | CcbBAadDEehHGgFf | CbAdEhGf | +B+0.-A+0.+B-1.-a+0.+B+1.-a+1.+B+2.-A+1. | 1612.03 |

wtaylor@mull1:~/fewpred/pred3guvA\$ head folds.best

| Build Rank | Fold       | 1 | Fold | 1   | 1669.002 | 34.45 | 48.45 | CcbBAadDEehHGgFf | CbAdEhGf | +B+0.-A+0.+B-1.-a+0.+B+1.-a+1.+B+2.-A+1. | 8298.47 |
|------------|------------|---|------|-----|----------|-------|-------|------------------|----------|------------------------------------------|---------|
| fold-4-1-1 | Build Rank | 1 | Fold | 1   | 1669.002 | 34.45 | 48.45 | CcbBAadDEehHGgFf | CbAdEhGf | +B+0.-A+0.+B-1.-a+0.+B+1.-a+1.+B+2.-A+1. | 7118.46 |
| fold-4-0-1 | Build Rank | 1 | Fold | 1   | 1669.002 | 34.45 | 48.45 | CcbBAadDEehHGgFf | CbAdEhGf | +B+0.-A+0.+B-1.-a+0.+B+1.-a+1.+B+2.-A+1. | 5440.91 |
| fold-0-1-1 | Build Rank | 1 | Fold | 1   | 1649.208 | 39.22 | 42.05 | CcbBAadDEehHGgFf | CbAdEhGf | +B+0.-A+0.+B-1.-a+0.+B+1.-a+1.+B+2.-A+1. | 5123.67 |
| fold-0-5-1 | Build Rank | 1 | Fold | 1   | 1634.165 | 38.89 | 42.02 | CcbBAadDEehHGgFf | CbAdEhGf | +B+0.-A+0.+B-1.-a+0.+B+1.-a+1.+B+2.-A+1. | 6635.97 |
| fold-5-1-1 | Build Rank | 1 | Fold | 1   | 1612.850 | 34.75 | 46.41 | CcbBAadDEehHGgFf | CbAdEhGf | +B+0.-A+0.+B-1.-a+0.+B+1.-a+1.+B+2.-A+1. | 6516.16 |
| fold-5-0-1 | Build Rank | 1 | Fold | 1   | 1612.850 | 34.75 | 46.41 | CcbBAadDEehHGgFf | CbAdEhGf | +B+0.-A+0.+B-1.-a+0.+B+1.-a+1.+B+2.-A+1. | 3172.21 |
| fold-0-2-1 | Build Rank | 1 | Fold | 182 | 1579.885 | 42.41 | 37.26 | cCBbaADdeEHhgGfF | cBaDeHgF | +B+0.-A+0.+B-1.-a+0.+B+1.-a+1.+B+2.-A+1. | 4102.83 |
| fold-0-3-1 | Build Rank | 1 | Fold | 182 | 1579.885 | 42.41 | 37.26 | cCBbaADdeEHhgGfF | cBaDeHgF | +B+0.-A+0.+B-1.-a+0.+B+1.-a+1.+B+2.-A+1. | 4052.71 |
| fold-4-5-1 | Build Rank | 1 | Fold | 130 | 1526.779 | 33.16 | 46.04 | CcbBAadDEehHGgFf | CbAdEhGf | +B+0.-A+0.+B-1.-a+0.+B+1.-a+1.+B+2.-A+1. | 8989.51 |
| fold-4-4-1 | Build Rank | 1 | Fold | 130 | 1526.779 | 33.16 | 46.04 | CcbBAadDEehHGgFf | CbAdEhGf | +B+0.-A+0.+B-1.-a+0.+B+1.-a+1.+B+2.-A+1. |         |

wtaylor@mull1:~/fewpred/pred3guvA\$ sort -nr -k9 folds.best | head

| Build Rank  | Fold       | 661 | Fold | 125  | 1145.056 | 20.22 | 56.64 | GghHIiffEebCcaAdD  | GhIfEbCaD | +B+0.-A+0.+B-1.-a+0.+B+1.-a+1.+B+2.+B+3.-A+1. | 3771.82 |
|-------------|------------|-----|------|------|----------|-------|-------|--------------------|-----------|-----------------------------------------------|---------|
| fold-12-1-7 | Build Rank | 16  | Fold | 125  | 1145.072 | 20.22 | 56.64 | CcbBAadDEehHGgIiff | CbAdEhGif | +B+0.-A+0.+B-1.-a+0.+B+1.-a+1.+B+2.+B+3.-A+1. | 4255.23 |
| fold-12-0-7 | Build Rank | 16  | Fold | 661  | 1145.056 | 20.22 | 56.64 | GghHIiffEebCcaAdD  | GhIfEbCaD | +B+0.-A+0.+B-1.-a+0.+B+1.-a+1.+B+2.+B+3.-A+1. | 4074.39 |
| fold-12-0-6 | Build Rank | 13  | Fold | 125  | 1145.072 | 20.22 | 56.64 | CcbBAadDEehHGgIiff | CbAdEhGif | +B+0.-A+0.+B-1.-a+0.+B+1.-a+1.+B+2.+B+3.-A+1. | 5004.49 |
| fold-7-1-14 | Build Rank | 27  | Fold | 1158 | 990.032  | 18.38 | 53.85 | GghHIiffEebCcaAdD  | GhIfEbCaD | +B+0.-A+0.+B-1.-a+0.+B+1.-a+1.+B+2.+B+3.-A+1. | 3617.54 |
| fold-7-0-14 | Build Rank | 27  | Fold | 1158 | 990.032  | 18.38 | 53.85 | GghHIiffEebCcaAdD  | GhIfEbCaD | +B+0.-A+0.+B-1.-a+0.+B+1.-a+1.+B+2.+B+3.-A+1. | 3046.71 |
| fold-7-1-6  | Build Rank | 12  | Fold | 1157 | 1112.760 | 20.69 | 53.78 | GghHIiffEebCcaAdd  | GhIfEbCaD | +B+0.-A+0.+B-1.-a+0.+B+1.-a+1.+B+2.-B+3.+A+1. | 3393.4  |
| fold-7-0-6  | Build Rank | 12  | Fold | 1157 | 1112.760 | 20.69 | 53.78 | GghHIiffEebCcaAdd  | GhIfEbCaD | +B+0.-A+0.+B-1.-a+0.+B+1.-a+1.+B+2.-B+3.+A+1. | 3487.3  |
| fold-45-3-5 | Build Rank | 5   | Fold | 167  | 795.299  | 14.87 | 53.49 | CcbBAadDEegGfFhhiI | CbAdEgFhi | +B+0.-A+0.+B-1.-a+0.+B+1.-a+1.+B+2.+B+3.-a+2. | 1495.9  |
| fold-45-2-5 | Build Rank | 5   | Fold | 167  | 795.299  | 14.87 | 53.49 | CcbBAadDEegGfFhhiI | CbAdEgFhi | +B+0.-A+0.+B-1.-a+0.+B+1.-a+1.+B+2.+B+3.-a+2. | 2731.42 |

2gj8A (161) = +B+0.-A+0.+B-1.-A-1.+B-2.-a+0.+B+1.-a+1.+B+2.-B+4.+B+3.-A+1

**The MnmE G-domain from Escherichia coli.** The top models under the combined score were a good approximations to this ras-like protein except that the irregular amino terminal edge of the domain had been predicted in a more regular (Rossmann-like) way. The reranked best list however, reproduced the ras-type topology on this edge with the one slight deviation of linking an exposed loop as a short extra strand on the edge of the sheet.

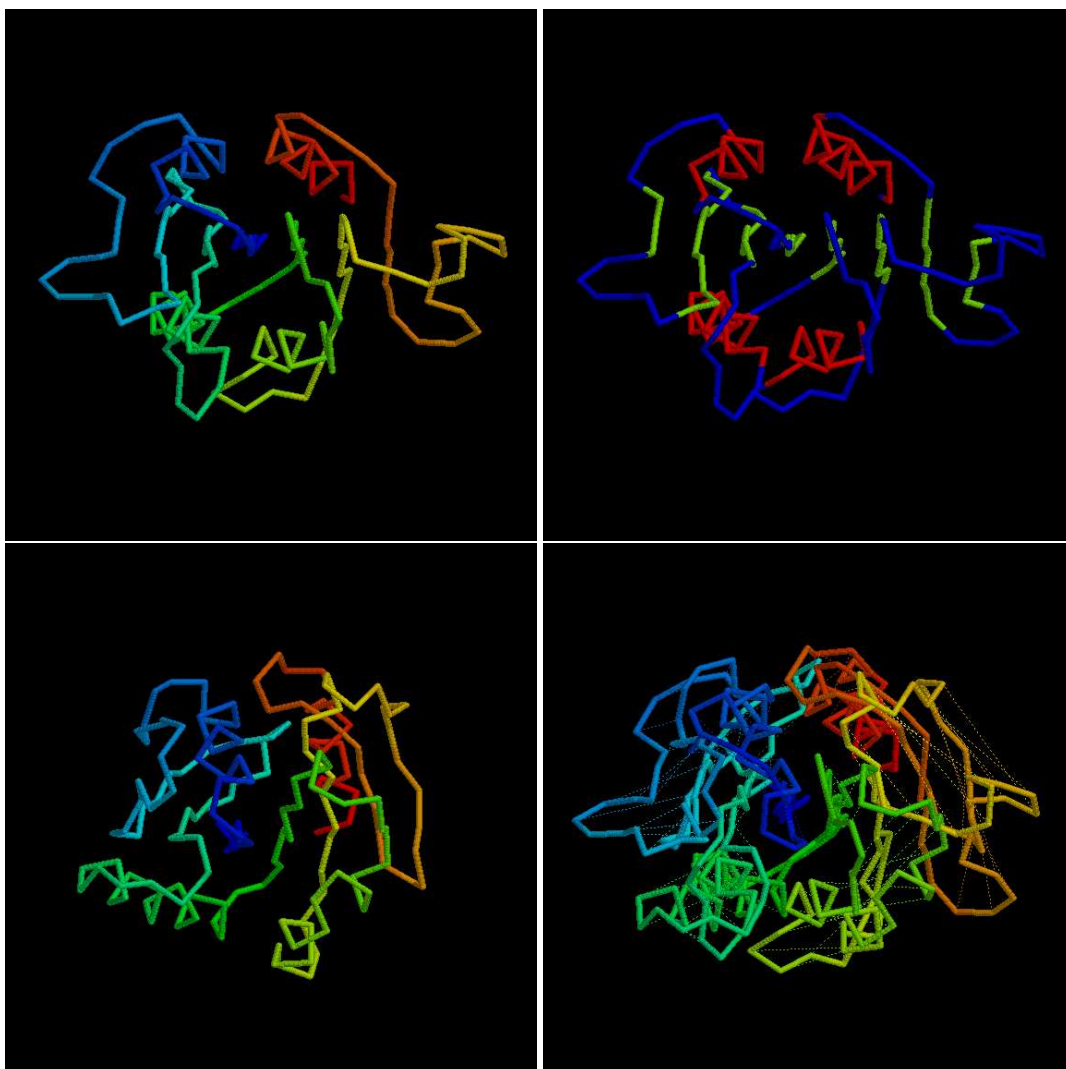

GLSTVI VGRPNVGRKSSLLNSL VHENKAI VTDI PGTRDVI EEYVNV RGVPLRLLD TAGI RETED VVERI GVERSQVLR KEADLI LLVNVNS DELTQ K VVE DMDVI VI VNKTDLPQOI DMERVE AGHRLVTTSL EDQGVDELEESI  
GLATVI I GRPNVGRKSSLLNAL AHENRAI VTDI PGTRDVI EEYVNV RGVPLRLLD TAGI RETED VVERI GVERSQVLR KEADLI LLVNVNS DELTQ AMI E GMDAI VI VNKTDLPRII DMERVE AGRPVVGTSL HEQGI DELEKAI AD  
GLKVAI VGRPNVGRKSSLLNAL WRS DRAI VTDI PGTRDVI VESQLV VGGI PI QVLD TAGI RETDN VEQI GVORSQQAALS ADLI LLVI DAS QGWA DOQLQKORRQQAPOS VLVVNLKADLLS ETTEVKDP API PTVLLS LSRQGI EQLEIAI AD  
GSKI VFI GKPNVGRKSSIFNI LSGNNNAI VTSI EGTTRDI LHEHI YLDNI PLHI YDTAGLRKTDKFI EKI GI LRALKEI KTS DHI LLVI VDSNI DKSNI K FNSNI NKNI TI RNKI DLSKEI PEI KI K KNNI I SLSAYTGEVDLI LYKLD  
GI NLAIVGPPNAGKSSLLNRLSLKEASI VTSFAGTRDVI REKI QI EGLLI HI YDTAGLR TI DEI EKEGI KRFLAEI AKANL L WVVDHNTTRHE KEQELFLKNI FLDNRI LII RNKI DLSQENARI EKL NFNVI KLSAKTGEFGLLYNYLKN  
GI PVAI VGPVNVGRKSSLLNAL NEERAI VSDI AGTRDVI EDEI SI VGI GFRFI DTAGI RETVDVI EGLGI KKTFEKI AQAVVLYLI NSEKFK VEI QKI RNRFPDKP LVLVANKI DHLS ETEQESI KNKS AVLLI SAKTGTGVEALKEQLIQ  
GI KVVI AGQPNVGRKSSLLNAL AGAELAI VTPVAGTRDVKVSLI QI EGVPLHVVD TAGLREALDEVEKI GI QRAWTEI ES ADAVLFLHDLARHDATD DARLSQALALRPNKNTAI I DVWNKSDMAGP ELRQVNGGVLSI KTAGALQALRQEL  
GLTYVI AGQPNVGRKSSLLNAL TKQPSAI VTDI AGTRDVLKETI HI DGMP LHI I DTAGLHNSNI I EQEGI RRAHTEI NN ADVLLVYLDYAKDKLADF SI LPFAVKNKPI I CI RNKI DLLKAKAEI KEVKHOTEVSL AKNGDGI DLRQALSEA  
GLTTVI AGRPNVGRKSSLLNAL AGRDIAI VTEI PGTRDRLRESLQV GGLPLHI YDTAGLRDSEDDI EREGI RRARDAL ANADI LLVCDARHTEAGD ALP ALDPETI PLI RI FNKI DLTGAPASL TVERETT VI HLSARTGEGVDLRLQEI  
GMTVVI AGRPNVGRKSSLLNAL AGREAII VTDI AGTRDVLREHI HI DGMP LHVVD TAGLRDSDHVEKI GVERAL KAI GEADRVLLVYDSTAPEASDPFALWPEFLDORPDAKVTLI RNKADLSGEHVGMEQDDGHVTI TLSAEDDMGLDLRLRHLKACM  
GMKVVI AGRPNVGRKSSLLNAL AGRDAI VTDI AGTRDVLREHI HI DGMP LHI I DTAGLRBATDEVERI GI NRAWHEI EQADRLLMLDS TDADSADLNKRVLEFLQKLPESLPVTI I RNKTDLSGENTGLSENGYI TI RLSAQTQGGVDLRLRHLKQTM  
GMKVVI AGRPNVGRKSSLLNAL AGREAII VTDI AGTRDVLREHI HI DGMP LHI I DTAGLRBATDEVERI GI TRAWNEI EQADRLLMLDS DPDSRQPEKVSSEFLAKLPSHI PVTI I RNKTDLSGENEGVTQENGFTVI RLSAQTROGI DLRHLRHLKQSM  
GMKVVI AGRPNVGRKSSLLNAL AGREAII VTAI AGTRDVLREHI HI DGMP LHI I DTAGLRNAGDEVERI GI ERAWBEI EQADHLLVMDDGAATPLSDPMLWPAFI ARLP SGMPVTVVNRKADLTGESVAI SDI SGYLLI TLSAQS GVGMDLRLRHLRHLKQSM  
GMKVVI AGRPNVGRKSSLLNAL AGREAII VTDI AGTRDVLREHI HI DGMP LHI I DTAGLRASDEVERI GI ERAWBEI EQADRVLFMVGGTITNDTPDKI WDFPI ERLPAS MGLTVI RNKVELTGEAAGI CHVNNP TLVLSAL TEGVDSL RHLRHLKQSM  
GMKVVI AGRPNVGRKSSLLNAL AGREAII VTDI AGTRDVLREHI HI DGMP LHI I DTAGLRASDEVERI GI ERAWBEI EQADRVLFMVGGTITNDTPDAVEI WPEFI ARLP AKPI I TVVRNKADI TGETLGMSEVNGHALI RLSARTGEGVDLRLRHLRHLKQSM

GLSTVI VGRPNVGRKSSLLNSL VHENKAI VTDI PGTRDVI EEYVNV RGVPLRLLD TAGI RETED VVERI GVERSQVLR KEADLI LLVNVNS DELTQ K VVE DMDVI VI VNKTDLPQOI DMERVE AGHRLVTTSL EDQGVDELEESI  
GLATVI I GRPNVGRKSSLLNAL AHENRAI VTDI PGTRDVI EEYVNV RGVPLRLLD TAGI RETED VVERI GVERSQVLR KEADLI LLVNVNS DELTQ AMI E GMDAI VI VNKTDLPRII DMERVE AGRPVVGTSL HEQGI DELEKAI AD  
GLKVAI VGRPNVGRKSSLLNAL WRS DRAI VTDI PGTRDVI VESQLV VGGI PI QVLD TAGI RETDN VEQI GVORSQQAALS ADLI LLVI DAS QGWA DOQLQKORRQQAPOS VLVVNLKADLLS ETTEVKDP API PTVLLS LSRQGI EQLEIAI AD  
GSKI VFI GKPNVGRKSSIFNI LSGNNNAI VTSI EGTTRDI LHEHI YLDNI PLHI YDTAGLRKTDKFI EKI GI LRALKEI KTS DHI LLVI VDSNI DKSNI K FNSNI NKNI TI RNKI DLSKEI PEI KI K KNNI I SLSAYTGEVDLI LYKLD  
GI NLAIVGPPNAGKSSLLNRLSLKEASI VTSFAGTRDVI REKI QI EGLLI HI YDTAGLR TI DEI EKEGI KRFLAEI AKANL L WVVDHNTTRHE KEQELFLKNI FLDNRI LII RNKI DLSQENARI EKL NFNVI KLSAKTGEFGLLYNYLKN  
GI PVAI VGPVNVGRKSSLLNAL NEERAI VSDI AGTRDVI EDEI SI VGI GFRFI DTAGI RETVDVI EGLGI KKTFEKI AQAVVLYLI NSEKFK VEI QKI RNRFPDKP LVLVANKI DHLS ETEQESI KNKS AVLLI SAKTGTGVEALKEQLIQ  
GI KVVI AGQPNVGRKSSLLNAL AGAELAI VTPVAGTRDVKVSLI QI EGVPLHVVD TAGLREALDEVEKI GI QRAWTEI ES ADAVLFLHDLARHDATD DARLSQALALRPNKNTAI I DVWNKSDMAGP ELRQVNGGVLSI KTAGALQALRQEL  
GLTYVI AGQPNVGRKSSLLNAL TKQPSAI VTDI AGTRDVLKETI HI DGMP LHI I DTAGLHNSNI I EQEGI RRAHTEI NN ADVLLVYLDYAKDKLADF SI LPFAVKNKPI I CI RNKI DLLKAKAEI KEVKHOTEVSL AKNGDGI DLRQALSEA  
GLTTVI AGRPNVGRKSSLLNAL AGRDIAI VTEI PGTRDRLRESLQV GGLPLHI YDTAGLRDSEDDI EREGI RRARDAL ANADI LLVCDARHTEAGD ALP ALDPETI PLI RI FNKI DLTGAPASL TVERETT VI HLSARTGEGVDLRLQEI  
GMTVVI AGRPNVGRKSSLLNAL AGREAII VTDI AGTRDVLREHI HI DGMP LHVVD TAGLRDSDHVEKI GVERAL KAI GEADRVLLVYDSTAPEASDPFALWPEFLDORPDAKVTLI RNKADLSGEHVGMEQDDGHVTI TLSAEDDMGLDLRLRHLKACM  
GMKVVI AGRPNVGRKSSLLNAL AGRDAI VTDI AGTRDVLREHI HI DGMP LHI I DTAGLRBATDEVERI GI NRAWHEI EQADRLLMLDS TDADSADLNKRVLEFLQKLPESLPVTI I RNKTDLSGENTGLSENGYI TI RLSAQTQGGVDLRLRHLKQTM  
GMKVVI AGRPNVGRKSSLLNAL AGREAII VTAI AGTRDVLREHI HI DGMP LHI I DTAGLRNAGDEVERI GI ERAWBEI EQADHLLVMDDGAATPLSDPMLWPAFI ARLP SGMPVTVVNRKADLTGESVAI SDI SGYLLI TLSAQS GVGMDLRLRHLRHLKQSM  
GMKVVI AGRPNVGRKSSLLNAL AGREAII VTDI AGTRDVLREHI HI DGMP LHI I DTAGLRASDEVERI GI ERAWBEI EQADRVLFMVGGTITNDTPDKI WDFPI ERLPAS MGLTVI RNKVELTGEAAGI CHVNNP TLVLSAL TEGVDSL RHLRHLKQSM  
GMKVVI AGRPNVGRKSSLLNAL AGREAII VTDI AGTRDVLREHI HI DGMP LHI I DTAGLRASDEVERI GI ERAWBEI EQADRVLFMVGGTITNDTPDAVEI WPEFI ARLP AKPI I TVVRNKADI TGETLGMSEVNGHALI RLSARTGEGVDLRLRHLRHLKQSM

GLSTVI VGRPNVGRKSSLLNSL VHENKAI VTDI PGTRDVI EEYVNV RGVPLRLLD TAGI RETED VVERI GVERSQVLR KEADLI LLVNVNS DELTQ K VVE DMDVI VI VNKTDLPQOI DMERVE AGHRLVTTSL EDQGVDELEESI  
GLATVI I GRPNVGRKSSLLNAL AHENRAI VTDI PGTRDVI EEYVNV RGVPLRLLD TAGI RETED VVERI GVERSQVLR KEADLI LLVNVNS DELTQ AMI E GMDAI VI VNKTDLPRII DMERVE AGRPVVGTSL HEQGI DELEKAI AD  
GLKVAI VGRPNVGRKSSLLNAL WRS DRAI VTDI PGTRDVI VESQLV VGGI PI QVLD TAGI RETDN VEQI GVORSQQAALS ADLI LLVI DAS QGWA DOQLQKORRQQAPOS VLVVNLKADLLS ETTEVKDP API PTVLLS LSRQGI EQLEIAI AD  
GSKI VFI GKPNVGRKSSIFNI LSGNNNAI VTSI EGTTRDI LHEHI YLDNI PLHI YDTAGLRKTDKFI EKI GI LRALKEI KTS DHI LLVI VDSNI DKSNI K FNSNI NKNI TI RNKI DLSKEI PEI KI K KNNI I SLSAYTGEVDLI LYKLD  
GI NLAIVGPPNAGKSSLLNRLSLKEASI VTSFAGTRDVI REKI QI EGLLI HI YDTAGLR TI DEI EKEGI KRFLAEI AKANL L WVVDHNTTRHE KEQELFLKNI FLDNRI LII RNKI DLSQENARI EKL NFNVI KLSAKTGEFGLLYNYLKN  
GI PVAI VGPVNVGRKSSLLNAL NEERAI VSDI AGTRDVI EDEI SI VGI GFRFI DTAGI RETVDVI EGLGI KKTFEKI AQAVVLYLI NSEKFK VEI QKI RNRFPDKP LVLVANKI DHLS ETEQESI KNKS AVLLI SAKTGTGVEALKEQLIQ  
GI KVVI AGQPNVGRKSSLLNAL AGAELAI VTPVAGTRDVKVSLI QI EGVPLHVVD TAGLREALDEVEKI GI QRAWTEI ES ADAVLFLHDLARHDATD DARLSQALALRPNKNTAI I DVWNKSDMAGP ELRQVNGGVLSI KTAGALQALRQEL  
GLTYVI AGQPNVGRKSSLLNAL TKQPSAI VTDI AGTRDVLKETI HI DGMP LHI I DTAGLHNSNI I EQEGI RRAHTEI NN ADVLLVYLDYAKDKLADF SI LPFAVKNKPI I CI RNKI DLLKAKAEI KEVKHOTEVSL AKNGDGI DLRQALSEA  
GLTTVI AGRPNVGRKSSLLNAL AGRDIAI VTEI PGTRDRLRESLQV GGLPLHI YDTAGLRDSEDDI EREGI RRARDAL ANADI LLVCDARHTEAGD ALP ALDPETI PLI RI FNKI DLTGAPASL TVERETT VI HLSARTGEGVDLRLQEI  
GMTVVI AGRPNVGRKSSLLNAL AGREAII VTDI AGTRDVLREHI HI DGMP LHVVD TAGLRDSDHVEKI GVERAL KAI GEADRVLLVYDSTAPEASDPFALWPEFLDORPDAKVTLI RNKADLSGEHVGMEQDDGHVTI TLSAEDDMGLDLRLRHLKACM  
GMKVVI AGRPNVGRKSSLLNAL AGRDAI VTDI AGTRDVLREHI HI DGMP LHI I DTAGLRBATDEVERI GI NRAWHEI EQADRLLMLDS TDADSADLNKRVLEFLQKLPESLPVTI I RNKTDLSGENTGLSENGYI TI RLSAQTQGGVDLRLRHLKQTM  
GMKVVI AGRPNVGRKSSLLNAL AGREAII VTAI AGTRDVLREHI HI DGMP LHI I DTAGLRNAGDEVERI GI ERAWBEI EQADHLLVMDDGAATPLSDPMLWPAFI ARLP SGMPVTVVNRKADLTGESVAI SDI SGYLLI TLSAQS GVGMDLRLRHLRHLKQSM  
GMKVVI AGRPNVGRKSSLLNAL AGREAII VTDI AGTRDVLREHI HI DGMP LHI I DTAGLRASDEVERI GI ERAWBEI EQADRVLFMVGGTITNDTPDKI WDFPI ERLPAS MGLTVI RNKVELTGEAAGI CHVNNP TLVLSAL TEGVDSL RHLRHLKQSM  
GMKVVI AGRPNVGRKSSLLNAL AGREAII VTDI AGTRDVLREHI HI DGMP LHI I DTAGLRASDEVERI GI ERAWBEI EQADRVLFMVGGTITNDTPDAVEI WPEFI ARLP AKPI I TVVRNKADI TGETLGMSEVNGHALI RLSARTGEGVDLRLRHLRHLKQSM

GLSTVI VGRPNVGRKSSLLNSL VHENKAI VTDI PGTRDVI EEYVNV RGVPLRLLD TAGI RETED VVERI GVERSQVLR KEADLI LLVNVNS DELTQ K VVE DMDVI VI VNKTDLPQOI DMERVE AGHRLVTTSL EDQGVDELEESI  
GLATVI I GRPNVGRKSSLLNAL AHENRAI VTDI PGTRDVI EEYVNV RGVPLRLLD TAGI RETED VVERI GVERSQVLR KEADLI LLVNVNS DELTQ AMI E GMDAI VI VNKTDLPRII DMERVE AGRPVVGTSL HEQGI DELEKAI AD  
GLKVAI VGRPNVGRKSSLLNAL WRS DRAI VTDI PGTRDVI VESQLV VGGI PI QVLD TAGI RETDN VEQI GVORSQQAALS ADLI LLVI DAS QGWA DOQLQKORRQQAPOS VLVVNLKADLLS ETTEVKDP API PTVLLS LSRQGI EQLEIAI AD  
GSKI VFI GKPNVGRKSSIFNI LSGNNNAI VTSI EGTTRDI LHEHI YLDNI PLHI YDTAGLRKTDKFI EKI GI LRALKEI KTS DHI LLVI VDSNI DKSNI K FNSNI NKNI TI RNKI DLSKEI PEI KI K KNNI I SLSAYTGEVDLI LYKLD  
GI NLAIVGPPNAGKSSLLNRLSLKEASI VTSFAGTRDVI REKI QI EGLLI HI YDTAGLR TI DEI EKEGI KRFLAEI AKANL L WVVDHNTTRHE KEQELFLKNI FLDNRI LII RNKI DLSQENARI EKL NFNVI KLSAKTGEFGLLYNYLKN  
GI PVAI VGPVNVGRKSSLLNAL NEERAI VSDI AGTRDVI EDEI SI VGI GFRFI DTAGI RETVDVI EGLGI KKTFEKI AQAVVLYLI NSEKFK VEI QKI RNRFPDKP LVLVANKI DHLS ETEQESI KNKS AVLLI SAKTGTGVEALKEQLIQ  
GI KVVI AGQPNVGRKSSLLNAL AGAELAI VTPVAGTRDVKVSLI QI EGVPLHVVD TAGLREALDEVEKI GI QRAWTEI ES ADAVLFLHDLARHDATD DARLSQALALRPNKNTAI I DVWNKSDMAGP ELRQVNGGVLSI KTAGALQALRQEL  
GLTYVI AGQPNVGRKSSLLNAL TKQPSAI VTDI AGTRDVLKETI HI DGMP LHI I DTAGLHNSNI I EQEGI RRAHTEI NN ADVLLVYLDYAKDKLADF SI LPFAVKNKPI I CI RNKI DLLKAKAEI KEVKHOTEVSL AKNGDGI DLRQALSEA  
GLTTVI AGRPNVGRKSSLLNAL AGRDIAI VTEI PGTRDRLRESLQV GGLPLHI YDTAGLRDSEDDI EREGI RRARDAL ANADI LLVCDARHTEAGD ALP ALDPETI PLI RI FNKI DLTGAPASL TVERETT VI HLSARTGEGVDLRLQEI  
GMTVVI AGRPNVGRKSSLLNAL AGREAII VTDI AGTRDVLREHI HI DGMP LHVVD TAGLRDSDHVEKI GVERAL KAI GEADRVLLVYDSTAPEASDPFALWPEFLDORPDAKVTLI RNKADLSGEHVGMEQDDGHVTI TLSAEDDMGLDLRLRHLKACM  
GMKVVI AGRPNVGRKSSLLNAL AGRDAI VTDI AGTRDVLREHI HI DGMP LHI I DTAGLRBATDEVERI GI NRAWHEI EQADRLLMLDS TDADSADLNKRVLEFLQKLPESLPVTI I RNKTDLSGENTGLSENGYI TI RLSAQTQGGVDLRLRHLKQTM  
GMKVVI AGRPNVGRKSSLLNAL AGREAII VTAI AGTRDVLREHI HI DGMP LHI I DTAGLRNAGDEVERI GI ERAWBEI EQADHLLVMDDGAATPLSDPMLWPAFI ARLP SGMPVTVVNRKADLTGESVAI SDI SGYLLI TLSAQS GVGMDLRLRHLRHLKQSM  
GMKVVI AGRPNVGRKSSLLNAL AGREAII VTDI AGTRDVLREHI HI DGMP LHI I DTAGLRASDEVERI GI ERAWBEI EQADRVLFMVGGTITNDTPDKI WDFPI ERLPAS MGLTVI RNKVELTGEAAGI CHVNNP TLVLSAL TEGVDSL RHLRHLKQSM  
GMKVVI AGRPNVGRKSSLLNAL AGREAII VTDI AGTRDVLREHI HI DGMP LHI I DTAGLRASDEVERI GI ERAWBEI EQADRVLFMVGGTITNDTPDAVEI WPEFI ARLP AKPI I TVVRNKADI TGETLGMSEVNGHALI RLSARTGEGVDLRLRHLRHLKQSM



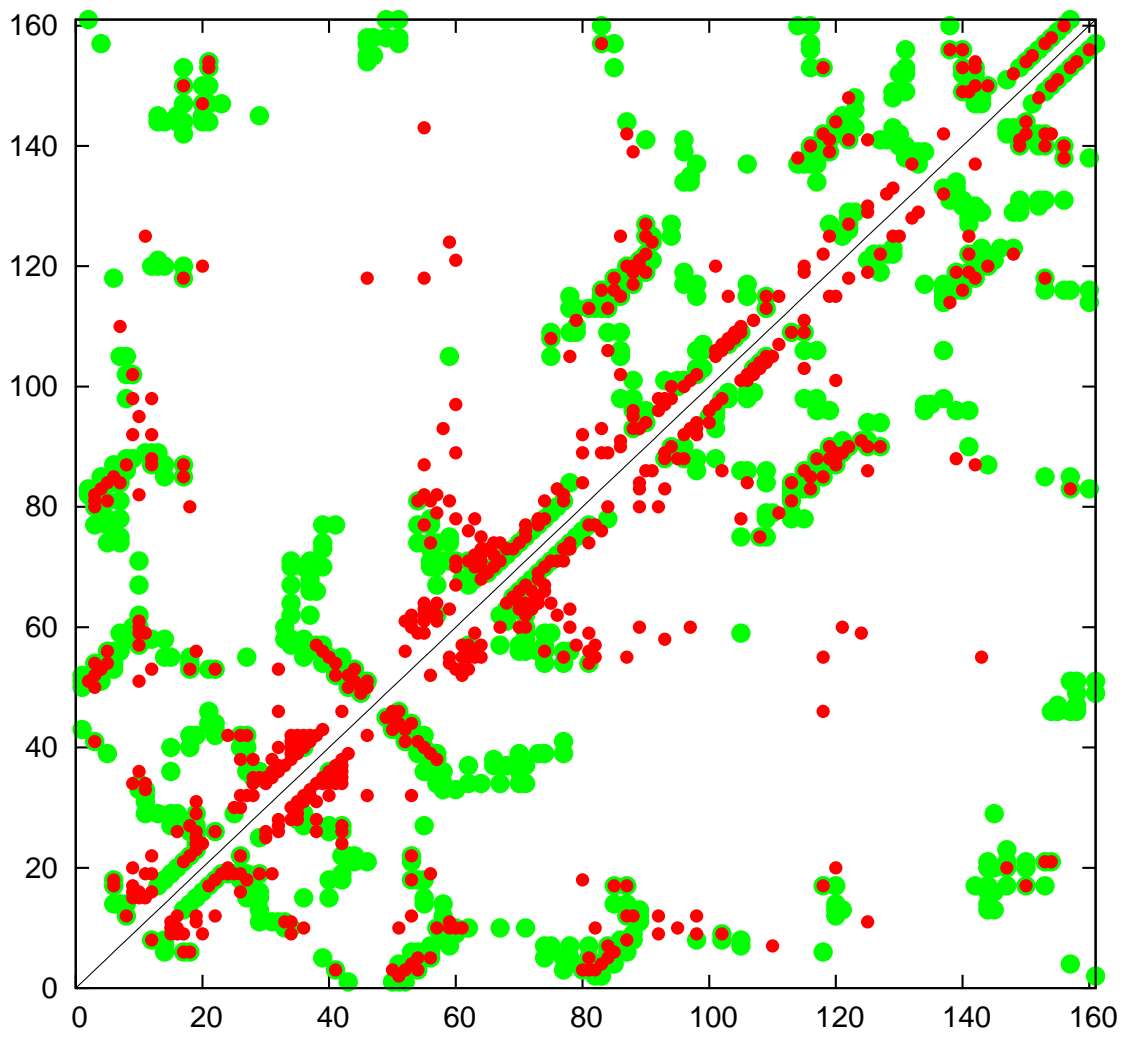

wtaylor@mull1:~/fewpred/pred2gj8A\$ head folds.sort

|                                      |       |      |   |      |     |          |       |       |                          |               |                                                              |         |
|--------------------------------------|-------|------|---|------|-----|----------|-------|-------|--------------------------|---------------|--------------------------------------------------------------|---------|
| build2gj8A/folds/fold-30-22-1:REMARK | Build | Rank | 1 | Fold | 833 | 2648.630 | 51.80 | 51.13 | gGHiILlKkKJJeEFfcCAabBdd | gHiLkJeFcAbd  | +B+0.-A+0.+B-1.-A-1.+B-2.-a+0.+B+1.-a+1.+B+2.-B+4.+B+3.-A+1. | 2648.22 |
| build2gj8A/folds/fold-31-22-1:REMARK | Build | Rank | 1 | Fold | 839 | 2624.941 | 50.71 | 51.77 | gGHiILlKkKJJeEFfcCAabBdd | gHiLkJeFcAbd  | +B+0.-A+0.+B-1.-A-1.+B-2.-a+0.+B+1.-a+1.+B+2.-B+4.+B+3.-A+1. | 2624.08 |
| build2gj8A/folds/fold-31-23-1:REMARK | Build | Rank | 1 | Fold | 839 | 2624.941 | 50.71 | 51.77 | gGHiILlKkKJJeEFfcCAabBdd | gHiLkJeFcAbd  | +B+0.-A+0.+B-1.-A-1.+B-2.-a+0.+B+1.-a+1.+B+2.-B+4.+B+3.-A+1. | 2624.03 |
| build2gj8A/folds/fold-44-3-1:REMARK  | Build | Rank | 1 | Fold | 763 | 2590.722 | 51.16 | 50.64 | eEFfcCBbaAddgGHiILlKkKJj | eFcBaDgHiLkKj | +B+0.-A+0.+B-1.-A-1.+B-2.-a+0.+B+1.-a+1.+B+2.-a+2.+B+3.-A+1. | 2590.18 |
| build2gj8A/folds/fold-44-2-1:REMARK  | Build | Rank | 1 | Fold | 763 | 2590.722 | 51.16 | 50.64 | eEFfcCBbaAddgGHiILlKkKJj | eFcBaDgHiLkKj | +B+0.-A+0.+B-1.-A-1.+B-2.-a+0.+B+1.-a+1.+B+2.-a+2.+B+3.-A+1. | 2590.01 |
| build2gj8A/folds/fold-32-23-1:REMARK | Build | Rank | 1 | Fold | 796 | 2585.012 | 50.01 | 51.69 | gGHiILlKkKJJeEFfcCAabBdd | gHiLkJeFcAbd  | +B+0.-A+0.+B-1.-A-1.+B-2.-a+0.+B+1.-a+1.+B+2.-B+4.+B+3.-A+1. | 2584.48 |
| build2gj8A/folds/fold-32-22-1:REMARK | Build | Rank | 1 | Fold | 796 | 2585.012 | 50.01 | 51.69 | gGHiILlKkKJJeEFfcCAabBdd | gHiLkJeFcAbd  | +B+0.-A+0.+B-1.-A-1.+B-2.-a+0.+B+1.-a+1.+B+2.-B+4.+B+3.-A+1. | 2584.22 |
| build2gj8A/folds/fold-36-23-1:REMARK | Build | Rank | 1 | Fold | 833 | 2576.206 | 51.41 | 50.11 | gGHiILlKkKJJeEFfcCAabBdd | gHiLkJeFcAbd  | +B+0.-A+0.+B-1.-A-1.+B-2.-a+0.+B+1.-a+1.+B+2.-B+4.+B+3.-A+1. | 2575.99 |
| build2gj8A/folds/fold-36-22-1:REMARK | Build | Rank | 1 | Fold | 833 | 2576.206 | 51.41 | 50.11 | gGHiILlKkKJJeEFfcCAabBdd | gHiLkJeFcAbd  | +B+0.-A+0.+B-1.-A-1.+B-2.-a+0.+B+1.-a+1.+B+2.-B+4.+B+3.-A+1. | 2575.71 |
| build2gj8A/folds/fold-28-22-1:REMARK | Build | Rank | 1 | Fold | 636 | 2552.804 | 52.11 | 48.99 | gGHiILlKkKJJeEFfcCAabBdd | gHiLkJeFcAbd  | +B+0.-A+0.+B-1.-A-1.+B-2.-a+0.+B+1.-a+1.+B+2.-B+4.+B+3.-A+1. | 2552.77 |

wtaylor@mull1:~/fewpred/pred2gj8A\$ head folds.best

|              |       |      |   |      |     |          |       |       |                          |               |                                                              |         |
|--------------|-------|------|---|------|-----|----------|-------|-------|--------------------------|---------------|--------------------------------------------------------------|---------|
| fold-30-22-1 | Build | Rank | 1 | Fold | 833 | 2648.630 | 51.80 | 51.13 | gGHiILlKkKJJeEFfcCAabBdd | gHiLkJeFcAbd  | +B+0.-A+0.+B-1.-A-1.+B-2.-a+0.+B+1.-a+1.+B+2.-B+4.+B+3.-A+1. | 8770.46 |
| fold-31-22-1 | Build | Rank | 1 | Fold | 839 | 2624.941 | 50.71 | 51.77 | gGHiILlKkKJJeEFfcCAabBdd | gHiLkJeFcAbd  | +B+0.-A+0.+B-1.-A-1.+B-2.-a+0.+B+1.-a+1.+B+2.-B+4.+B+3.-A+1. | 13244.4 |
| fold-31-23-1 | Build | Rank | 1 | Fold | 839 | 2624.941 | 50.71 | 51.77 | gGHiILlKkKJJeEFfcCAabBdd | gHiLkJeFcAbd  | +B+0.-A+0.+B-1.-A-1.+B-2.-a+0.+B+1.-a+1.+B+2.-B+4.+B+3.-A+1. | 11494.8 |
| fold-44-3-1  | Build | Rank | 1 | Fold | 763 | 2590.722 | 51.16 | 50.64 | eEFfcCBbaAddgGHiILlKkKJj | eFcBaDgHiLkKj | +B+0.-A+0.+B-1.-A-1.+B-2.-a+0.+B+1.-a+1.+B+2.-a+2.+B+3.-A+1. | 12808.6 |
| fold-44-2-1  | Build | Rank | 1 | Fold | 763 | 2590.722 | 51.16 | 50.64 | eEFfcCBbaAddgGHiILlKkKJj | eFcBaDgHiLkKj | +B+0.-A+0.+B-1.-A-1.+B-2.-a+0.+B+1.-a+1.+B+2.-a+2.+B+3.-A+1. | 12682.6 |
| fold-32-23-1 | Build | Rank | 1 | Fold | 796 | 2585.012 | 50.01 | 51.69 | gGHiILlKkKJJeEFfcCAabBdd | gHiLkJeFcAbd  | +B+0.-A+0.+B-1.-A-1.+B-2.-a+0.+B+1.-a+1.+B+2.-B+4.+B+3.-A+1. | 13715.2 |
| fold-32-22-1 | Build | Rank | 1 | Fold | 796 | 2585.012 | 50.01 | 51.69 | gGHiILlKkKJJeEFfcCAabBdd | gHiLkJeFcAbd  | +B+0.-A+0.+B-1.-A-1.+B-2.-a+0.+B+1.-a+1.+B+2.-B+4.+B+3.-A+1. | 8855.32 |
| fold-36-23-1 | Build | Rank | 1 | Fold | 833 | 2576.206 | 51.41 | 50.11 | gGHiILlKkKJJeEFfcCAabBdd | gHiLkJeFcAbd  | +B+0.-A+0.+B-1.-A-1.+B-2.-a+0.+B+1.-a+1.+B+2.-B+4.+B+3.-A+1. | 8351.6  |
| fold-36-22-1 | Build | Rank | 1 | Fold | 833 | 2576.206 | 51.41 | 50.11 | gGHiILlKkKJJeEFfcCAabBdd | gHiLkJeFcAbd  | +B+0.-A+0.+B-1.-A-1.+B-2.-a+0.+B+1.-a+1.+B+2.-B+4.+B+3.-A+1. | 8319.07 |
| fold-28-22-1 | Build | Rank | 1 | Fold | 636 | 2552.804 | 52.11 | 48.99 | gGHiILlKkKJJeEFfcCAabBdd | gHiLkJeFcAbd  | +B+0.-A+0.+B-1.-A-1.+B-2.-a+0.+B+1.-a+1.+B+2.-B+4.+B+3.-A+1. | 10144.1 |

wtaylor@mull1:~/fewpred/pred2gj8A\$ sort -nr -k9 folds.best | head

|              |       |      |   |      |      |          |       |       |                          |              |                                                              |         |
|--------------|-------|------|---|------|------|----------|-------|-------|--------------------------|--------------|--------------------------------------------------------------|---------|
| fold-9-1-2   | Build | Rank | 4 | Fold | 774  | 2274.048 | 34.50 | 65.92 | GgjJLlKkIihHEedDCcaABbFf | GjLkIhEdCaBf | +B+0.-A+0.+B-3.-B-2.+B-1.-a+0.+B+1.-a+1.+B+2.-B+4.+B+3.-A+1. | 9550.56 |
| fold-9-0-2   | Build | Rank | 4 | Fold | 774  | 2274.048 | 34.50 | 65.92 | GgjJLlKkIihHEedDCcaABbFf | GjLkIhEdCaBf | +B+0.-A+0.+B-3.-B-2.+B-1.-a+0.+B+1.-a+1.+B+2.-B+4.+B+3.-A+1. | 11506.9 |
| fold-11-21-3 | Build | Rank | 3 | Fold | 7299 | 2246.004 | 34.23 | 65.62 | GgjJLlKkIihHEedDCcaABbFf | GjLkIhEdCaBf | +B+0.-A+0.+B-3.-B-2.+B-1.-a+0.+B+1.-a+1.+B+2.-B+4.+B+3.-A+1. | 8351.02 |
| fold-11-20-3 | Build | Rank | 3 | Fold | 7299 | 2246.004 | 34.23 | 65.62 | GgjJLlKkIihHEedDCcaABbFf | GjLkIhEdCaBf | +B+0.-A+0.+B-3.-B-2.+B-1.-a+0.+B+1.-a+1.+B+2.-B+4.+B+3.-A+1. | 7015.96 |
| fold-2-21-3  | Build | Rank | 3 | Fold | 8653 | 2245.654 | 34.23 | 65.61 | GgjJLlKkIihHEedDCcaABbFf | GjLkIhEdCaBf | +B+0.-A+0.+B-3.-B-2.+B-1.-a+0.+B+1.-a+1.+B+2.-B+4.+B+3.-A+1. | 8288.47 |
| fold-2-20-3  | Build | Rank | 3 | Fold | 8653 | 2245.654 | 34.23 | 65.61 | GgjJLlKkIihHEedDCcaABbFf | GjLkIhEdCaBf | +B+0.-A+0.+B-3.-B-2.+B-1.-a+0.+B+1.-a+1.+B+2.-B+4.+B+3.-A+1. | 11043.1 |
| fold-11-1-2  | Build | Rank | 4 | Fold | 322  | 2259.926 | 34.46 | 65.59 | GgjJLlKkIihHEedDCcaABbFf | GjLkIhEdCaBf | +B+0.-A+0.+B-3.-B-2.+B-1.-a+0.+B+1.-a+1.+B+2.-B+4.+B+3.-A+1. | 9133.88 |
| fold-11-0-2  | Build | Rank | 4 | Fold | 322  | 2259.926 | 34.46 | 65.59 | GgjJLlKkIihHEedDCcaABbFf | GjLkIhEdCaBf | +B+0.-A+0.+B-3.-B-2.+B-1.-a+0.+B+1.-a+1.+B+2.-B+4.+B+3.-A+1. | 9867.85 |
| fold-2-1-2   | Build | Rank | 4 | Fold | 336  | 2257.542 | 34.46 | 65.52 | GgjJLlKkIihHEedDCcaABbFf | GjLkIhEdCaBf | +B+0.-A+0.+B-3.-B-2.+B-1.-a+0.+B+1.-a+1.+B+2.-B+4.+B+3.-A+1. | 9615.78 |
| fold-2-0-2   | Build | Rank | 4 | Fold | 336  | 2257.542 | 34.46 | 65.52 | GgjJLlKkIihHEedDCcaABbFf | GjLkIhEdCaBf | +B+0.-A+0.+B-3.-B-2.+B-1.-a+0.+B+1.-a+1.+B+2.-B+4.+B+3.-A+1. | 10923   |

2amjA (180) = +B+0.-A+0.+B-1.-a+0.+B+1.-a+1.+B+2.-a+2.+B+3.-A+1

**A modulator of drug activity B from Escherichia coli.** The same model was ranked top of both the full and best lists and had the correct fold. The top folds in the reranked best list, however, all included an extra edge strand resulting in a rearrangement on the C-terminal edge of the domain with the correct fold being displaced to rank 60.

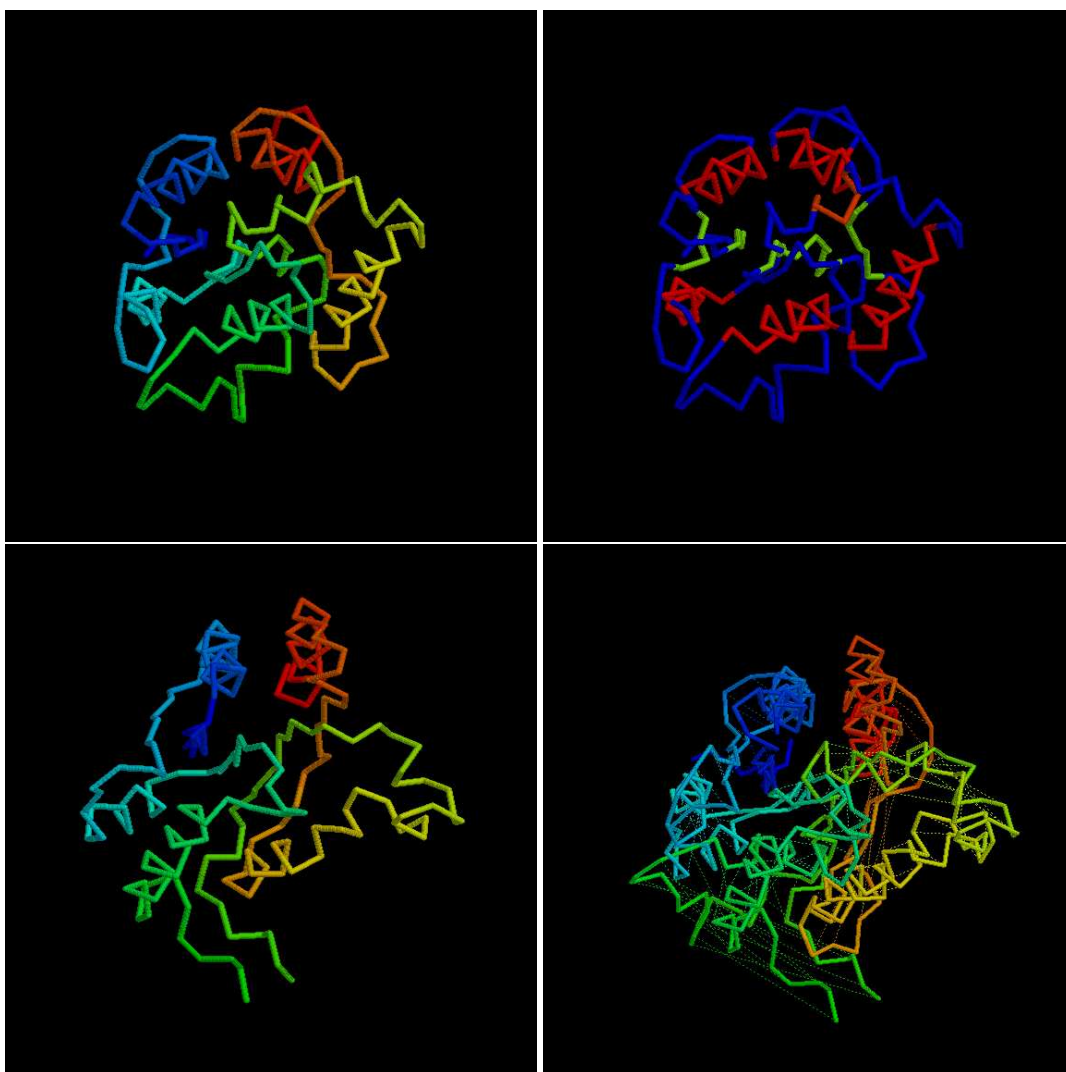



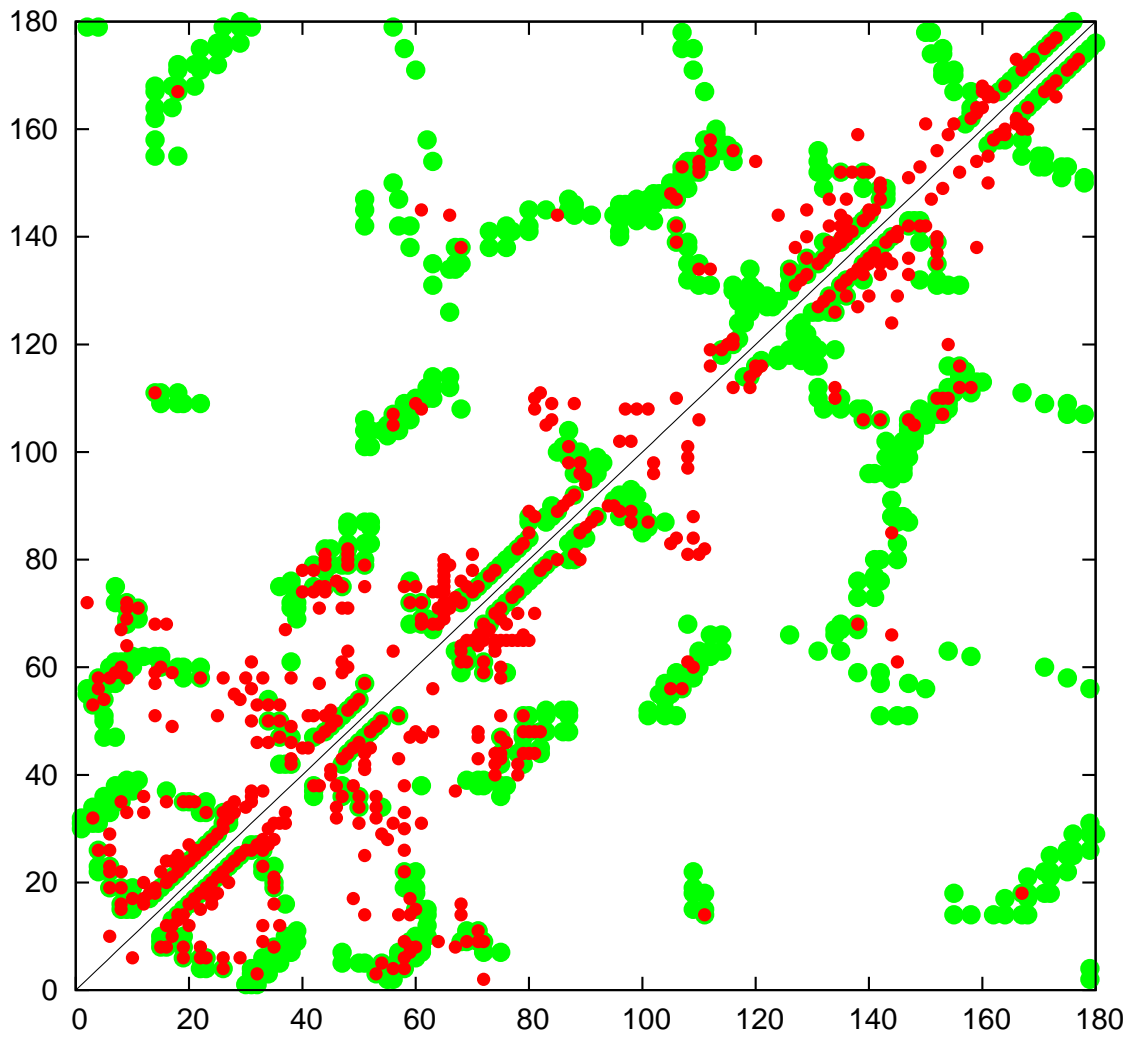

wtaylor@mull1:~/fewpred/pred2amjA\$ head folds.full

|                                     |       |      |   |      |      |          |       |       |                      |             |                                                    |         |
|-------------------------------------|-------|------|---|------|------|----------|-------|-------|----------------------|-------------|----------------------------------------------------|---------|
| build2amjA/folds/fold-12-4-1:REMARK | Build | Rank | 1 | Fold | 3353 | 1211.596 | 26.53 | 45.67 | cCDdaABbeEFfgGJjiIHh | cDaBeFgJih  | +B+0.-A+0.+B-1.-a+0.+B+1.-a+1.+B+2.-a+2.+B+3.-A+1. | 1210.81 |
| build2amjA/folds/fold-12-5-1:REMARK | Build | Rank | 1 | Fold | 3353 | 1211.596 | 26.53 | 45.67 | cCDdaABbeEFfgGJjiIHh | cDaBeFgJih  | +B+0.-A+0.+B-1.-a+0.+B+1.-a+1.+B+2.-a+2.+B+3.-A+1. | 1210.72 |
| build2amjA/folds/fold-12-5-2:REMARK | Build | Rank | 2 | Fold | 529  | 1211.193 | 32.24 | 37.57 | eEDdaABbcCFfiIHhgGJj | eDaBcFiHhgJ | +B+0.-A+0.+B-2.-a+0.+B-1.-a+1.+B+2.-A+1.+B+1.-a+2. | 1210.11 |
| build2amjA/folds/fold-12-4-2:REMARK | Build | Rank | 2 | Fold | 529  | 1211.193 | 32.24 | 37.57 | eEDdaABbcCFfiIHhgGJj | eDaBcFiHhgJ | +B+0.-A+0.+B-2.-a+0.+B-1.-a+1.+B+2.-A+1.+B+1.-a+2. | 1209.9  |
| build2amjA/folds/fold-12-4-3:REMARK | Build | Rank | 3 | Fold | 1203 | 1207.525 | 26.53 | 45.51 | GghHiiJjEefFcCbBAadD | GhIjEfCbAd  | +B+0.-A+0.+B-1.-a+0.+B+1.-a+1.+B+2.-a+2.+B+3.-A+1. | 1206.21 |
| build2amjA/folds/fold-12-5-3:REMARK | Build | Rank | 3 | Fold | 1203 | 1207.525 | 26.53 | 45.51 | GghHiiJjEefFcCbBAadD | GhIjEfCbAd  | +B+0.-A+0.+B-1.-a+0.+B+1.-a+1.+B+2.-a+2.+B+3.-A+1. | 1205.84 |
| build2amjA/folds/fold-12-4-4:REMARK | Build | Rank | 4 | Fold | 3363 | 1205.505 | 31.15 | 38.70 | cCDdaABbeEFfiIHhgGJj | cDaBeFiHhgJ | +B+0.-A+0.+B-1.-a+0.+B+1.-a+1.+B+3.-A+1.+B+2.-a+2. | 1204.02 |
| build2amjA/folds/fold-12-5-4:REMARK | Build | Rank | 4 | Fold | 3363 | 1205.505 | 31.15 | 38.70 | cCDdaABbeEFfiIHhgGJj | cDaBeFiHhgJ | +B+0.-A+0.+B-1.-a+0.+B+1.-a+1.+B+3.-A+1.+B+2.-a+2. | 1203.61 |
| build2amjA/folds/fold-12-4-5:REMARK | Build | Rank | 5 | Fold | 328  | 1205.298 | 32.24 | 37.39 | EehHiiJjGgfFAadDccbb | EhIjGfAdCb  | +B+0.-A+0.+B-2.-a+0.+B-1.-a+1.+B+2.-A+1.+B+1.-a+2. | 1203.52 |
| build2amjA/folds/fold-12-5-5:REMARK | Build | Rank | 5 | Fold | 328  | 1205.298 | 32.24 | 37.39 | EehHiiJjGgfFAadDccbb | EhIjGfAdCb  | +B+0.-A+0.+B-2.-a+0.+B-1.-a+1.+B+2.-A+1.+B+1.-a+2. | 1203.21 |

wtaylor@mull1:~/fewpred/pred2amjA\$ head folds.best

|              |       |      |    |      |      |          |       |       |                      |            |                                                    |         |
|--------------|-------|------|----|------|------|----------|-------|-------|----------------------|------------|----------------------------------------------------|---------|
| fold-12-4-1  | Build | Rank | 1  | Fold | 3353 | 1211.596 | 26.53 | 45.67 | cCDdaABbeEFfgGJjiIHh | cDaBeFgJih | +B+0.-A+0.+B-1.-a+0.+B+1.-a+1.+B+2.-a+2.+B+3.-A+1. | 4574.76 |
| fold-12-5-1  | Build | Rank | 1  | Fold | 3353 | 1211.596 | 26.53 | 45.67 | cCDdaABbeEFfgGJjiIHh | cDaBeFgJih | +B+0.-A+0.+B-1.-a+0.+B+1.-a+1.+B+2.-a+2.+B+3.-A+1. | 4903.27 |
| fold-12-4-3  | Build | Rank | 3  | Fold | 1203 | 1207.525 | 26.53 | 45.51 | GghHiiJjEefFcCbBAadD | GhIjEfCbAd | +B+0.-A+0.+B-1.-a+0.+B+1.-a+1.+B+2.-a+2.+B+3.-A+1. | 4393.73 |
| fold-12-5-3  | Build | Rank | 3  | Fold | 1203 | 1207.525 | 26.53 | 45.51 | GghHiiJjEefFcCbBAadD | GhIjEfCbAd | +B+0.-A+0.+B-1.-a+0.+B+1.-a+1.+B+2.-a+2.+B+3.-A+1. | 4443.93 |
| fold-12-4-9  | Build | Rank | 9  | Fold | 3354 | 1150.657 | 25.20 | 45.67 | cCDdaABbeEFfgGJjiIHh | cDaBeFgJih | +B+0.-A+0.+B-1.-a+0.+B+1.-a+1.+B+2.-a+2.+B+3.+A+1. | 3271.71 |
| fold-12-5-9  | Build | Rank | 9  | Fold | 3354 | 1150.657 | 25.20 | 45.67 | cCDdaABbeEFfgGJjiIHh | cDaBeFgJih | +B+0.-A+0.+B-1.-a+0.+B+1.-a+1.+B+2.-a+2.+B+3.+A+1. | 5239.77 |
| fold-12-5-10 | Build | Rank | 10 | Fold | 1204 | 1146.785 | 25.20 | 45.51 | GghHiiJjEefFcCbBAadD | GhIjEfCbAd | +B+0.-A+0.+B-1.-a+0.+B+1.-a+1.+B+2.-a+2.+B+3.+A+1. | 5206.45 |
| fold-12-4-12 | Build | Rank | 12 | Fold | 731  | 1120.151 | 30.65 | 36.55 | eEjjiIHhgDdaABbcCFf  | eJiHgDaBcF | +B+0.-A+0.+B-2.-a+0.+B-1.-a+1.+B+2.-A+2.+B+1.-A+1. | 3719.28 |
| fold-12-0-3  | Build | Rank | 3  | Fold | 3212 | 1102.119 | 26.45 | 41.67 | gGHiiIjjeEFfcCBbaADd | gHiJeFcBaD | +B+0.-A+0.+B-1.-a+0.+B+1.-a+1.+B+2.-a+2.+B+3.-A+1. | 4107.96 |
| fold-12-1-3  | Build | Rank | 3  | Fold | 3212 | 1102.119 | 26.45 | 41.67 | gGHiiIjjeEFfcCBbaADd | gHiJeFcBaD | +B+0.-A+0.+B-1.-a+0.+B+1.-a+1.+B+2.-a+2.+B+3.-A+1. | 3695.68 |

wtaylor@mull1:~/fewpred/pred2amjA\$ sort -nr -k9 folds.best | head

|              |       |      |    |      |      |         |       |       |                        |             |                                                         |         |
|--------------|-------|------|----|------|------|---------|-------|-------|------------------------|-------------|---------------------------------------------------------|---------|
| fold-0-23-2  | Build | Rank | 2  | Fold | 4180 | 853.203 | 17.21 | 49.58 | hHiiJjKkffGgeEAaBbcCdd | hIjKfGeABcd | +B+0.-A+0.+B-1.-a+0.+B+1.-a+1.+B+2.-B+4.-A+1.+B+3.-a+2. | 2316.54 |
| fold-0-22-2  | Build | Rank | 2  | Fold | 4180 | 853.203 | 17.21 | 49.58 | hHiiJjKkffGgeEAaBbcCdd | hIjKfGeABcd | +B+0.-A+0.+B-1.-a+0.+B+1.-a+1.+B+2.-B+4.-A+1.+B+3.-a+2. | 1998.52 |
| fold-0-22-19 | Build | Rank | 19 | Fold | 4181 | 774.795 | 15.63 | 49.58 | hHiiJjKkffGgeEAaBbcCdd | hIjKfGeABcd | +B+0.-A+0.+B-1.-a+0.+B+1.-a+1.+B+2.-B+4.-A+1.+B+3.+a+2. | 2580.23 |
| fold-0-11-3  | Build | Rank | 3  | Fold | 1032 | 851.767 | 17.36 | 49.07 | CcbBAadDEegGFfjJiIHhkK | CbAdEgFjIhK | +B+0.-A+0.+B-1.-a+0.+B+1.-a+1.+B+2.-B+4.-A+1.+B+3.-a+2. | 3059.01 |
| fold-0-11-17 | Build | Rank | 17 | Fold | 1033 | 776.677 | 15.83 | 49.07 | CcbBAadDEegGFfjJiIHhkK | CbAdEgFjIhK | +B+0.-A+0.+B-1.-a+0.+B+1.-a+1.+B+2.-B+4.-A+1.+B+3.+a+2. | 2641.51 |
| fold-0-11-10 | Build | Rank | 10 | Fold | 1036 | 810.713 | 16.52 | 49.07 | CcbBAadDEegGFfjJiIHhkK | CbAdEgFjIhK | +B+0.-A+0.+B-1.-a+0.+B+1.-a+1.+B+2.-B+4.-a+2.+B+3.-A+1. | 3624.17 |
| fold-0-10-3  | Build | Rank | 3  | Fold | 1032 | 851.767 | 17.36 | 49.07 | CcbBAadDEegGFfjJiIHhkK | CbAdEgFjIhK | +B+0.-A+0.+B-1.-a+0.+B+1.-a+1.+B+2.-B+4.-A+1.+B+3.-a+2. | 2597.66 |
| fold-0-10-17 | Build | Rank | 17 | Fold | 1033 | 776.677 | 15.83 | 49.07 | CcbBAadDEegGFfjJiIHhkK | CbAdEgFjIhK | +B+0.-A+0.+B-1.-a+0.+B+1.-a+1.+B+2.-B+4.-A+1.+B+3.+a+2. | 2337.25 |
| fold-0-10-10 | Build | Rank | 10 | Fold | 1036 | 810.713 | 16.52 | 49.07 | CcbBAadDEegGFfjJiIHhkK | CbAdEgFjIhK | +B+0.-A+0.+B-1.-a+0.+B+1.-a+1.+B+2.-B+4.-a+2.+B+3.-A+1. | 3976.79 |
| fold-0-23-10 | Build | Rank | 10 | Fold | 4185 | 787.909 | 16.21 | 48.60 | hHiiJjKkffGgeEAadDcCbB | hIjKfGeAdCb | +B+0.-A+0.+B-1.-a+0.+B+1.-a+1.+B+2.-B+4.-a+2.+B+3.-A+1. | 2407.44 |

1vjnA (194)

**A putative Zn-dependent hydrolase of the metallo-beta-lactamase superfamily from *thermotoga maritima*.** Unlike the proteins considered above, 1vjnA has two  $\beta$ -sheets, forming a three-layer  $\beta\beta\alpha$  architecture (0-6+7-3), with a  $3_{10}$  helix on the empty face bringing it close to a 4-layer architecture. The PLATO server considered all three and four layer Forms with the dominant selections being the 4-layer  $\alpha\beta\beta\alpha$  architecture, resulting from the prediction of the  $3_{10}$  helix and some other loops as  $\alpha$ -helices. The combinations of almost 20 secondary structure elements over this size of Form are ‘astronomic’ and the correct fold was not found.

1opiA (202) = -A+0.+B+0.-B-1.+B-2.+a+0.-B+1.-A+2.+B+4.-a+1.-B+2.+B+3.-A+1

**L-fuculose-1-phosphate aldolase from *Bacteroides thetaiotaomicron*.** The same fold was top of both the full and best list and was a good approximation to the native fold with the exception of a swap between the first and third (edge)  $\beta$ -strands. Although this seems reasonable on the basis of their relative hydrophobicity, the predicted contacts linked the first strand to deeper SSEs and in the reranked topology the top fold corresponded to the native.

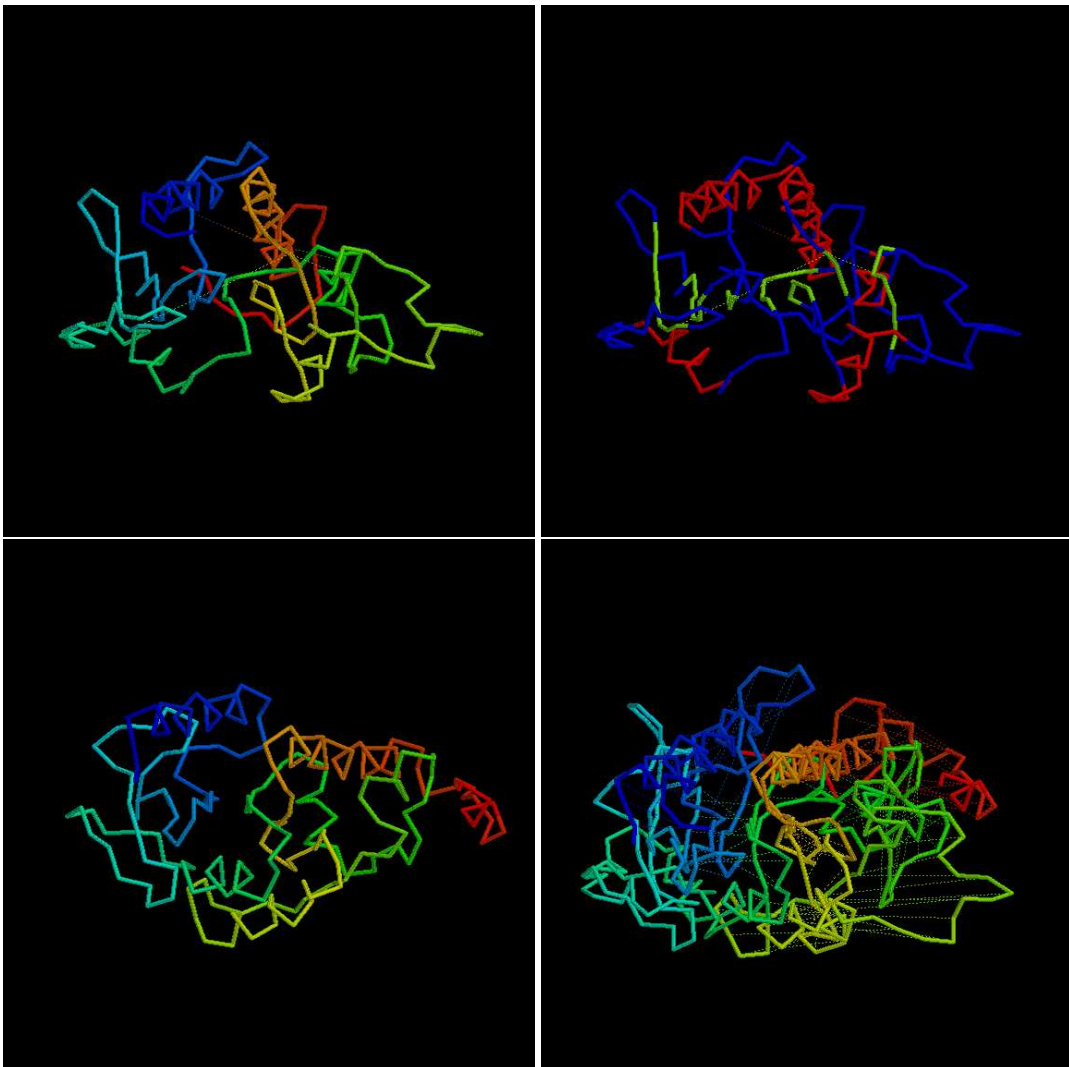





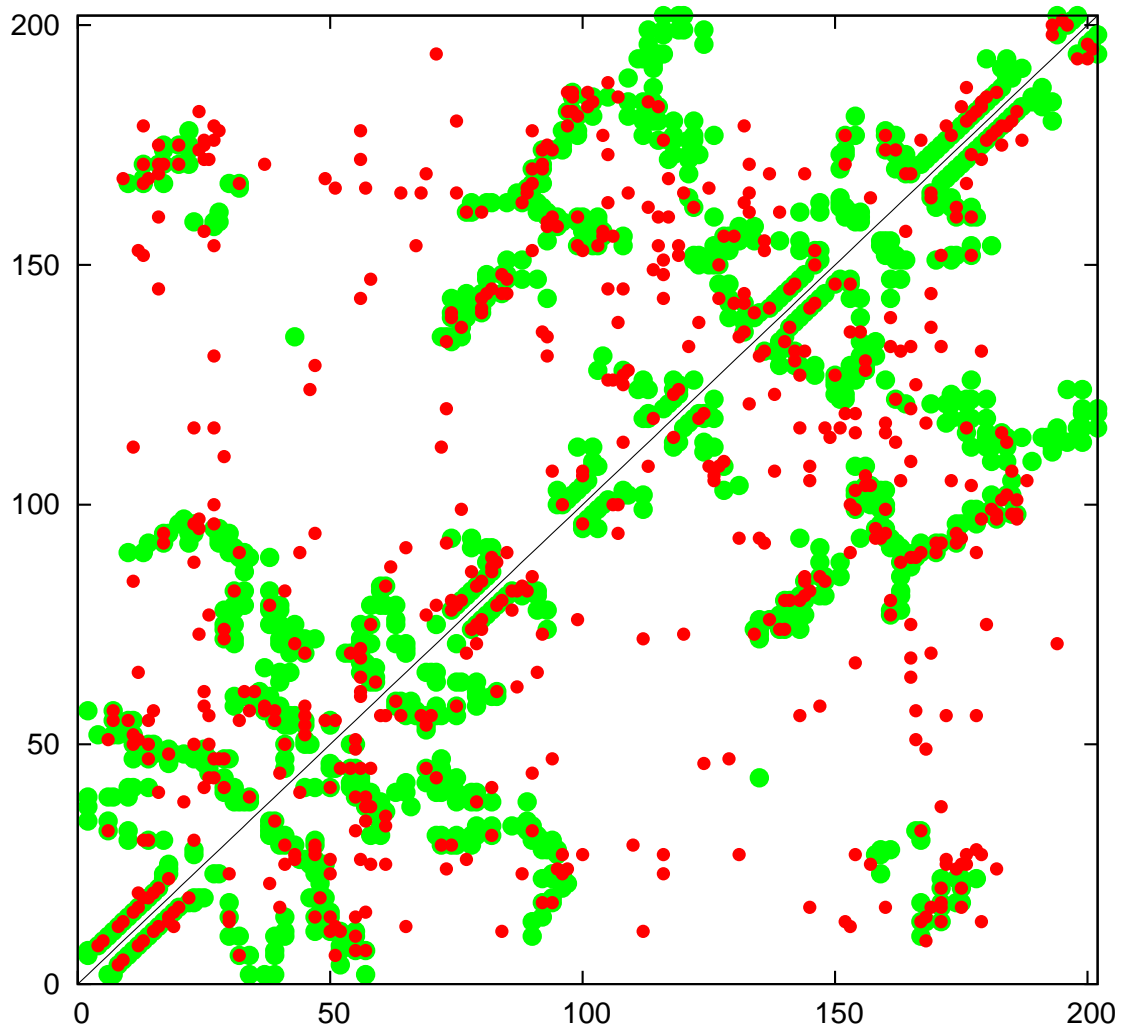

wtaylor@mull1:~/newpred/pred2opiA\$ head folds.sort

|                                    |       |      |   |      |      |          |       |       |                          |              |                                                              |         |
|------------------------------------|-------|------|---|------|------|----------|-------|-------|--------------------------|--------------|--------------------------------------------------------------|---------|
| build2opiA/folds/fold-7-1-1:REMARK | Build | Rank | 1 | Fold | 2088 | 1211.513 | 31.16 | 38.89 | CcaABbdDeEFfKkLliIJjhHGg | CaBdeFkLiJhG | -A+0.+B+0.-B+1.+B+2.+a+0.-B+3.+A+2.-B+6.+a+1.-B+5.+B+4.-A+1. | 1211.24 |
| build2opiA/folds/fold-7-0-1:REMARK | Build | Rank | 1 | Fold | 2088 | 1211.513 | 31.16 | 38.89 | CcaABbdDeEFfKkLliIJjhHGg | CaBdeFkLiJhG | -A+0.+B+0.-B+1.+B+2.+a+0.-B+3.+A+2.-B+6.+a+1.-B+5.+B+4.-A+1. | 1210.7  |
| build2opiA/folds/fold-7-1-2:REMARK | Build | Rank | 2 | Fold | 2091 | 1183.490 | 31.39 | 37.70 | CcaABbdDeEFfKkLliIHhjJGg | CaBdeFkLiHjG | -A+0.+B+0.-B+1.+B+2.+a+0.-B+3.+A+2.-B+6.+a+1.-B+4.+B+5.-A+1. | 1182.96 |
| build2opiA/folds/fold-7-0-2:REMARK | Build | Rank | 2 | Fold | 2091 | 1183.490 | 31.39 | 37.70 | CcaABbdDeEFfKkLliIHhjJGg | CaBdeFkLiHjG | -A+0.+B+0.-B+1.+B+2.+a+0.-B+3.+A+2.-B+6.+a+1.-B+4.+B+5.-A+1. | 1182.78 |
| build2opiA/folds/fold-3-0-1:REMARK | Build | Rank | 1 | Fold | 2735 | 1136.571 | 31.20 | 36.42 | jJiIkKlLHhgGdaABbcCEefF  | jKlHgDaBcEf  | -A+0.+B+0.-B+1.-a+0.+a-1.-B-1.+a-2.-B-4.+A-2.-B-3.+B-2.-A-1. | 1136.04 |
| build2opiA/folds/fold-3-1-1:REMARK | Build | Rank | 1 | Fold | 2735 | 1136.571 | 31.20 | 36.42 | jJiIkKlLHhgGdaABbcCEefF  | jKlHgDaBcEf  | -A+0.+B+0.-B+1.-a+0.+a-1.-B-1.+a-2.-B-4.+A-2.-B-3.+B-2.-A-1. | 1135.65 |
| build2opiA/folds/fold-7-8-1:REMARK | Build | Rank | 2 | Fold | 3369 | 1129.653 | 28.23 | 40.02 | KkLlJjhHiIFfbBAadDCceEGg | KlJhiFbAdCeG | -A+0.+B+0.-B-1.+B-2.+a+0.-B-3.+a-1.-B-6.+A-2.-B-5.+B-4.-A-1. | 1129.23 |
| build2opiA/folds/fold-7-9-1:REMARK | Build | Rank | 2 | Fold | 3369 | 1129.653 | 28.23 | 40.02 | KkLlJjhHiIFfbBAadDCceEGg | KlJhiFbAdCeG | -A+0.+B+0.-B-1.+B-2.+a+0.-B-3.+a-1.-B-6.+A-2.-B-5.+B-4.-A-1. | 1128.33 |
| build2opiA/folds/fold-7-9-2:REMARK | Build | Rank | 3 | Fold | 5093 | 1085.273 | 25.84 | 41.99 | KkhHLLjJiIFfbBAadDCceEGg | KhLjiFbAdCeG | -A+0.+B+0.-B+2.+B+1.+a+0.-B-1.+a-1.-B-4.+A-2.-B-3.+B-2.-A-1. | 1084.29 |
| build2opiA/folds/fold-7-8-2:REMARK | Build | Rank | 3 | Fold | 5093 | 1085.273 | 25.84 | 41.99 | KkhHLLjJiIFfbBAadDCceEGg | KhLjiFbAdCeG | -A+0.+B+0.-B+2.+B+1.+a+0.-B-1.+a-1.-B-4.+A-2.-B-3.+B-2.-A-1. | 1083.74 |

wtaylor@mull1:~/newpred/pred2opiA\$ head folds.best

|              |       |      |   |      |      |          |       |       |                           |               |                                                                   |         |
|--------------|-------|------|---|------|------|----------|-------|-------|---------------------------|---------------|-------------------------------------------------------------------|---------|
| fold-7-1-1   | Build | Rank | 1 | Fold | 2088 | 1211.513 | 31.16 | 38.89 | CcaABbdDeEFfKkLliIJjhHGg  | CaBdeFkLiJhG  | -A+0.+B+0.-B+1.+B+2.+a+0.-B+3.+A+2.-B+6.+a+1.-B+5.+B+4.-A+1.      | 2881.99 |
| fold-7-0-1   | Build | Rank | 1 | Fold | 2088 | 1211.513 | 31.16 | 38.89 | CcaABbdDeEFfKkLliIJjhHGg  | CaBdeFkLiJhG  | -A+0.+B+0.-B+1.+B+2.+a+0.-B+3.+A+2.-B+6.+a+1.-B+5.+B+4.-A+1.      | 2467.89 |
| fold-7-1-2   | Build | Rank | 2 | Fold | 2091 | 1183.490 | 31.39 | 37.70 | CcaABbdDeEFfKkLliIHhjJGg  | CaBdeFkLiHjG  | -A+0.+B+0.-B+1.+B+2.+a+0.-B+3.+A+2.-B+6.+a+1.-B+4.+B+5.-A+1.      | 3553.46 |
| fold-7-0-2   | Build | Rank | 2 | Fold | 2091 | 1183.490 | 31.39 | 37.70 | CcaABbdDeEFfKkLliIHhjJGg  | CaBdeFkLiHjG  | -A+0.+B+0.-B+1.+B+2.+a+0.-B+3.+A+2.-B+6.+a+1.-B+4.+B+5.-A+1.      | 2625.47 |
| fold-7-8-1   | Build | Rank | 2 | Fold | 3369 | 1129.653 | 28.23 | 40.02 | KkLlJjhHiIFfbBAadDCceEGg  | KlJhiFbAdCeG  | -A+0.+B+0.-B-1.+B-2.+a+0.-B-3.+a-1.-B-6.+A-2.-B-5.+B-4.-A-1.      | 3032.97 |
| fold-7-9-1   | Build | Rank | 2 | Fold | 3369 | 1129.653 | 28.23 | 40.02 | KkLlJjhHiIFfbBAadDCceEGg  | KlJhiFbAdCeG  | -A+0.+B+0.-B-1.+B-2.+a+0.-B-3.+a-1.-B-6.+A-2.-B-5.+B-4.-A-1.      | 4708.56 |
| fold-7-9-2   | Build | Rank | 3 | Fold | 5093 | 1085.273 | 25.84 | 41.99 | KkhHLLjJiIFfbBAadDCceEGg  | KhLjiFbAdCeG  | -A+0.+B+0.-B+2.+B+1.+a+0.-B-1.+a-1.-B-4.+A-2.-B-3.+B-2.-A-1.      | 3736.25 |
| fold-7-8-2   | Build | Rank | 3 | Fold | 5093 | 1085.273 | 25.84 | 41.99 | KkhHLLjJiIFfbBAadDCceEGg  | KhLjiFbAdCeG  | -A+0.+B+0.-B+2.+B+1.+a+0.-B-1.+a-1.-B-4.+A-2.-B-3.+B-2.-A-1.      | 4846.5  |
| fold-39-20-2 | Build | Rank | 2 | Fold | 7539 | 1081.934 | 28.72 | 37.67 | dAabBCcFfeEGgmMjjiIKkhHLL | dAbCFeGmjiKhL | -A+0.+B+0.-B+1.+B+2.+a+0.-B+3.+B+4.-B+7.+a+1.-B+5.+B+6.-A+1.+A+2. | 3530.43 |
| fold-39-20-3 | Build | Rank | 3 | Fold | 16   | 1078.719 | 25.37 | 42.52 | dCcaABbFfeEGgmMjjiIKkhHLL | dCaBFeGmjiKhL | -A+0.+B+0.-B-2.+B-1.+a+0.-B+1.+B+2.-B+5.+a+1.-B+3.+B+4.-A+1.-A+2. | 2490.77 |

wtaylor@mull1:~/newpred/pred2opiA\$ sort -nr -k9 folds.best | head

|             |       |      |    |      |      |         |       |       |                           |               |                                                              |         |
|-------------|-------|------|----|------|------|---------|-------|-------|---------------------------|---------------|--------------------------------------------------------------|---------|
| fold-7-8-10 | Build | Rank | 14 | Fold | 2649 | 918.080 | 18.40 | 49.91 | DdeECcaABbFfKkLliIHhjJGg  | DeCabFkLiHjG  | -A+0.+B+0.-B-1.+B-2.+a+0.-B+1.-A+2.+B+4.-a+1.-B+2.+B+3.-A+1. | 2342.34 |
| fold-7-8-14 | Build | Rank | 18 | Fold | 2646 | 906.669 | 18.82 | 48.19 | DdeECcaABbFfKkLliIJjhHGg  | DeCabFkLiJhG  | -A+0.+B+0.-B-1.+B-2.+a+0.-B+1.-A+2.+B+4.-a+1.-B+3.+B+2.-A+1. | 2551.55 |
| fold-7-9-25 | Build | Rank | 32 | Fold | 2652 | 752.583 | 15.77 | 47.72 | DdeECcaABbFfKkHhIiLLjJGg  | DeCabFkHilJg  | -A+0.+B+0.-B-1.+B-2.+a+0.-B+1.-A+2.+B+2.+a+1.-B+4.+B+3.-A+1. | 2426.79 |
| fold-7-8-25 | Build | Rank | 32 | Fold | 2652 | 752.583 | 15.77 | 47.72 | DdeECcaABbFfKkHhIiLLjJGg  | DeCabFkHilJg  | -A+0.+B+0.-B-1.+B-2.+a+0.-B+1.-A+2.+B+2.+a+1.-B+4.+B+3.-A+1. | 2630.92 |
| fold-7-9-33 | Build | Rank | 43 | Fold | 2658 | 736.725 | 15.86 | 46.44 | DdeECcaABbFfKkKjjiLLlhHGg | DeCabFkjiLhg  | -A+0.+B+0.-B-1.+B-2.+a+0.-B+1.-A+2.+B+3.+a+1.-B+4.+B+2.-A+1. | 2148.3  |
| fold-7-8-33 | Build | Rank | 43 | Fold | 2658 | 736.725 | 15.86 | 46.44 | DdeECcaABbFfKkKjjiLLlhHGg | DeCabFkjiLhg  | -A+0.+B+0.-B-1.+B-2.+a+0.-B+1.-A+2.+B+3.+a+1.-B+4.+B+2.-A+1. | 1763.38 |
| fold-7-9-13 | Build | Rank | 17 | Fold | 2679 | 908.129 | 20.39 | 44.54 | DdeECcaABbFfiIILKkjjHhHGg | DeCabFiKjHhG  | -A+0.+B+0.-B-1.+B-2.+a+0.-B+1.+a+1.+B+4.-A+2.-B+3.+B+2.-A+1. | 3455.72 |
| fold-7-8-13 | Build | Rank | 17 | Fold | 2679 | 908.129 | 20.39 | 44.54 | DdeECcaABbFfiIILKkjjHhHGg | DeCabFiKjHhG  | -A+0.+B+0.-B-1.+B-2.+a+0.-B+1.+a+1.+B+4.-A+2.-B+3.+B+2.-A+1. | 3037.65 |
| fold-7-9-47 | Build | Rank | 60 | Fold | 2685 | 698.849 | 15.70 | 44.50 | DdeECcaABbFfiIjJkKlLhHGg  | DeCabFijKlHhG | -A+0.+B+0.-B-1.+B-2.+a+0.-B+1.+a+1.+B+3.-A+2.-B+4.+B+2.-A+1. | 2469.99 |
| fold-7-9-5  | Build | Rank | 6  | Fold | 2670 | 989.248 | 22.55 | 43.86 | DdeECcaABbFfKkLliIHhjJGg  | DeCabFkLiHjG  | -A+0.+B+0.-B-1.+B-2.+a+0.-B+1.+A+2.-B+4.+a+1.-B+2.+B+3.-A+1. | 3016.37 |
